# Supplementary material for: MARV: a tool for genome-wide multi-phenotype analysis of rare variants
Source: BMC Bioinformatics. 2017 Feb 16;18:110. doi: 10.1186/s12859-017-1530-2 (PMC5311849; doi:10.1186/s12859-017-1530-2)
Supplement: Additional file 4: — marv_chr16-22.result. Original results files outputted from MARV from the case study using NFBC1966 data. (RESULT 14097 kb) [file 12859_2017_1530_MOESM4_ESM.result]

Gene	RareCount	N	RareVariantSum	TotalMAF	AverageMAF	PhenotypeCount	Mask	LogLikelihood	nullLogLikelihood	LikelihoodRatio	P.value	BIC	BICnull	Model	sortedModel
uc010utx.1	1	4721	21	0.00230415	0.00230415	3	111	10433.4	10432.7	1.27239	0.735699	-20832.9	-20857	tg_qn+lnfi+whr_qn	lnfi+tg_qn+whr_qn
uc010utx.1	1	4721	21	0.00230415	0.00230415	2	110	10433.3	10432.7	1.24691	0.536088	-20841.3	-20857	tg_qn+lnfi	lnfi+tg_qn
uc010utx.1	1	4721	21	0.00230415	0.00230415	2	101	10433.3	10432.7	1.16328	0.558982	-20841.2	-20857	tg_qn+whr_qn	tg_qn+whr_qn
uc010utx.1	1	4721	21	0.00230415	0.00230415	1	100	10433.3	10432.7	1.14961	0.283631	-20849.7	-20857	tg_qn	tg_qn
uc010utx.1	1	4721	21	0.00230415	0.00230415	2	11	10432.8	10432.7	0.095629	0.953311	-20840.1	-20857	lnfi+whr_qn	lnfi+whr_qn
uc010utx.1	1	4721	21	0.00230415	0.00230415	1	10	10432.7	10432.7	0.0100228	0.920254	-20848.5	-20857	lnfi	lnfi
uc010utx.1	1	4721	21	0.00230415	0.00230415	1	1	10432.8	10432.7	0.0940244	0.759122	-20848.6	-20857	whr_qn	whr_qn
uc010bqm.2	1	4721	21	0.00230415	0.00230415	3	111	10433.4	10432.7	1.27239	0.735699	-20832.9	-20857	tg_qn+lnfi+whr_qn	lnfi+tg_qn+whr_qn
uc010bqm.2	1	4721	21	0.00230415	0.00230415	2	110	10433.3	10432.7	1.24691	0.536088	-20841.3	-20857	tg_qn+lnfi	lnfi+tg_qn
uc010bqm.2	1	4721	21	0.00230415	0.00230415	2	101	10433.3	10432.7	1.16328	0.558982	-20841.2	-20857	tg_qn+whr_qn	tg_qn+whr_qn
uc010bqm.2	1	4721	21	0.00230415	0.00230415	1	100	10433.3	10432.7	1.14961	0.283631	-20849.7	-20857	tg_qn	tg_qn
uc010bqm.2	1	4721	21	0.00230415	0.00230415	2	11	10432.8	10432.7	0.095629	0.953311	-20840.1	-20857	lnfi+whr_qn	lnfi+whr_qn
uc010bqm.2	1	4721	21	0.00230415	0.00230415	1	10	10432.7	10432.7	0.0100228	0.920254	-20848.5	-20857	lnfi	lnfi
uc010bqm.2	1	4721	21	0.00230415	0.00230415	1	1	10432.8	10432.7	0.0940244	0.759122	-20848.6	-20857	whr_qn	whr_qn
uc002cfg.1	1	4721	1	0.000107735	0.000107735	3	111	17609.7	17609.3	0.882869	0.82956	-35185.6	-35210.1	tg_qn+lnfi+whr_qn	lnfi+tg_qn+whr_qn
uc002cfg.1	1	4721	1	0.000107735	0.000107735	2	110	17609.4	17609.3	0.106105	0.94833	-35193.3	-35210.1	tg_qn+lnfi	lnfi+tg_qn
uc002cfg.1	1	4721	1	0.000107735	0.000107735	2	101	17609.7	17609.3	0.865459	0.648736	-35194.1	-35210.1	tg_qn+whr_qn	tg_qn+whr_qn
uc002cfg.1	1	4721	1	0.000107735	0.000107735	1	100	17609.4	17609.3	0.10632	0.744373	-35201.8	-35210.1	tg_qn	tg_qn
uc002cfg.1	1	4721	1	0.000107735	0.000107735	2	11	17609.7	17609.3	0.84239	0.656262	-35194.1	-35210.1	lnfi+whr_qn	lnfi+whr_qn
uc002cfg.1	1	4721	1	0.000107735	0.000107735	1	10	17609.3	17609.3	0.010247	0.91937	-35201.7	-35210.1	lnfi	lnfi
uc002cfg.1	1	4721	1	0.000107735	0.000107735	1	1	17609.7	17609.3	0.838132	0.359932	-35202.5	-35210.1	whr_qn	whr_qn
uc002cfi.1	12	4721	50	0.00543036	0.00045253	3	111	19853.9	19852.6	2.59147	0.458987	-39674	-39696.8	tg_qn+lnfi+whr_qn	lnfi+tg_qn+whr_qn
uc002cfi.1	12	4721	50	0.00543036	0.00045253	2	110	19853	19852.6	0.818	0.664314	-39680.7	-39696.8	tg_qn+lnfi	lnfi+tg_qn
uc002cfi.1	12	4721	50	0.00543036	0.00045253	2	101	19853.8	19852.6	2.40903	0.299838	-39682.3	-39696.8	tg_qn+whr_qn	tg_qn+whr_qn
uc002cfi.1	12	4721	50	0.00543036	0.00045253	1	100	19853	19852.6	0.753581	0.385345	-39689.1	-39696.8	tg_qn	tg_qn
uc002cfi.1	12	4721	50	0.00543036	0.00045253	2	11	19853.7	19852.6	2.05173	0.358487	-39681.9	-39696.8	lnfi+whr_qn	lnfi+whr_qn
uc002cfi.1	12	4721	50	0.00543036	0.00045253	1	10	19852.6	19852.6	0.00833405	0.927261	-39688.3	-39696.8	lnfi	lnfi
uc002cfi.1	12	4721	50	0.00543036	0.00045253	1	1	19853.6	19852.6	2.01636	0.155612	-39690.3	-39696.8	whr_qn	whr_qn
uc002cfj.3	12	4721	602	0.0672128	0.00560107	3	111	14307.6	14306.9	1.39094	0.707659	-28581.4	-28605.4	tg_qn+lnfi+whr_qn	lnfi+tg_qn+whr_qn
uc002cfj.3	12	4721	602	0.0672128	0.00560107	2	110	14307.4	14306.9	0.826365	0.661541	-28589.3	-28605.4	tg_qn+lnfi	lnfi+tg_qn
uc002cfj.3	12	4721	602	0.0672128	0.00560107	2	101	14307.4	14306.9	0.999768	0.606601	-28589.5	-28605.4	tg_qn+whr_qn	tg_qn+whr_qn
uc002cfj.3	12	4721	602	0.0672128	0.00560107	1	100	14307.2	14306.9	0.546131	0.459903	-28597.5	-28605.4	tg_qn	tg_qn
uc002cfj.3	12	4721	602	0.0672128	0.00560107	2	11	14307.3	14306.9	0.77528	0.678656	-28589.3	-28605.4	lnfi+whr_qn	lnfi+whr_qn
uc002cfj.3	12	4721	602	0.0672128	0.00560107	1	10	14307	14306.9	0.0527059	0.81842	-28597	-28605.4	lnfi	lnfi
uc002cfj.3	12	4721	602	0.0672128	0.00560107	1	1	14307.3	14306.9	0.626935	0.428482	-28597.6	-28605.4	whr_qn	whr_qn
uc002cfk.3	7	4721	528	0.059221	0.00846014	3	111	12131.8	12130.9	1.77926	0.619458	-24229.8	-24253.4	tg_qn+lnfi+whr_qn	lnfi+tg_qn+whr_qn
uc002cfk.3	7	4721	528	0.059221	0.00846014	2	110	12131.4	12130.9	1.00747	0.604269	-24237.5	-24253.4	tg_qn+lnfi	lnfi+tg_qn
uc002cfk.3	7	4721	528	0.059221	0.00846014	2	101	12131.7	12130.9	1.50982	0.470052	-24238	-24253.4	tg_qn+whr_qn	tg_qn+whr_qn
uc002cfk.3	7	4721	528	0.059221	0.00846014	1	100	12131.3	12130.9	0.841603	0.358939	-24245.8	-24253.4	tg_qn	tg_qn
uc002cfk.3	7	4721	528	0.059221	0.00846014	2	11	12131.4	12130.9	0.989957	0.609584	-24237.4	-24253.4	lnfi+whr_qn	lnfi+whr_qn
uc002cfk.3	7	4721	528	0.059221	0.00846014	1	10	12130.9	12130.9	0.0090906	0.924041	-24244.9	-24253.4	lnfi	lnfi
uc002cfk.3	7	4721	528	0.059221	0.00846014	1	1	12131.4	12130.9	0.931628	0.33444	-24245.8	-24253.4	whr_qn	whr_qn
uc002cfl.3	40	4721	4311	0.474916	0.0118729	3	111	10569	10568.8	0.500949	0.918683	-21104.3	-21129.1	tg_qn+lnfi+whr_qn	lnfi+tg_qn+whr_qn
uc002cfl.3	40	4721	4311	0.474916	0.0118729	2	110	10569	10568.8	0.410901	0.814281	-21112.6	-21129.1	tg_qn+lnfi	lnfi+tg_qn
uc002cfl.3	40	4721	4311	0.474916	0.0118729	2	101	10568.9	10568.8	0.241006	0.886474	-21112.5	-21129.1	tg_qn+whr_qn	tg_qn+whr_qn
uc002cfl.3	40	4721	4311	0.474916	0.0118729	1	100	10568.9	10568.8	0.177877	0.673204	-21120.9	-21129.1	tg_qn	tg_qn
uc002cfl.3	40	4721	4311	0.474916	0.0118729	2	11	10569	10568.8	0.419052	0.810969	-21112.6	-21129.1	lnfi+whr_qn	lnfi+whr_qn
uc002cfl.3	40	4721	4311	0.474916	0.0118729	1	10	10569	10568.8	0.340812	0.559361	-21121	-21129.1	lnfi	lnfi
uc002cfl.3	40	4721	4311	0.474916	0.0118729	1	1	10568.8	10568.8	0.0411123	0.839321	-21120.7	-21129.1	whr_qn	whr_qn
uc010uty.1	31	4721	4086	0.45064	0.0145368	3	111	9393.98	9393.64	0.684035	0.876952	-18754.1	-18778.8	tg_qn+lnfi+whr_qn	lnfi+tg_qn+whr_qn
uc010uty.1	31	4721	4086	0.45064	0.0145368	2	110	9393.92	9393.64	0.550736	0.759293	-18762.5	-18778.8	tg_qn+lnfi	lnfi+tg_qn
uc010uty.1	31	4721	4086	0.45064	0.0145368	2	101	9393.82	9393.64	0.362571	0.834197	-18762.3	-18778.8	tg_qn+whr_qn	tg_qn+whr_qn
uc010uty.1	31	4721	4086	0.45064	0.0145368	1	100	9393.77	9393.64	0.265925	0.606079	-18770.6	-18778.8	tg_qn	tg_qn
uc010uty.1	31	4721	4086	0.45064	0.0145368	2	11	9393.92	9393.64	0.553113	0.758391	-18762.5	-18778.8	lnfi+whr_qn	lnfi+whr_qn
uc010uty.1	31	4721	4086	0.45064	0.0145368	1	10	9393.86	9393.64	0.439493	0.507367	-18770.8	-18778.8	lnfi	lnfi
uc010uty.1	31	4721	4086	0.45064	0.0145368	1	1	9393.67	9393.64	0.0618289	0.803628	-18770.4	-18778.8	whr_qn	whr_qn
uc010bqo.1	32	4721	4584	0.508509	0.0158909	3	111	8460.67	8460.2	0.946615	0.814166	-16887.5	-16911.9	tg_qn+lnfi+whr_qn	lnfi+tg_qn+whr_qn
uc010bqo.1	32	4721	4584	0.508509	0.0158909	2	110	8460.51	8460.2	0.629981	0.729796	-16895.6	-16911.9	tg_qn+lnfi	lnfi+tg_qn
uc010bqo.1	32	4721	4584	0.508509	0.0158909	2	101	8460.54	8460.2	0.684431	0.710195	-16895.7	-16911.9	tg_qn+whr_qn	tg_qn+whr_qn
uc010bqo.1	32	4721	4584	0.508509	0.0158909	1	100	8460.41	8460.2	0.422506	0.515689	-16903.9	-16911.9	tg_qn	tg_qn
uc010bqo.1	32	4721	4584	0.508509	0.0158909	2	11	8460.53	8460.2	0.65963	0.719057	-16895.7	-16911.9	lnfi+whr_qn	lnfi+whr_qn
uc010bqo.1	32	4721	4584	0.508509	0.0158909	1	10	8460.39	8460.2	0.396392	0.528959	-16903.9	-16911.9	lnfi	lnfi
uc010bqo.1	32	4721	4584	0.508509	0.0158909	1	1	8460.28	8460.2	0.168695	0.681274	-16903.6	-16911.9	whr_qn	whr_qn
uc010utz.1	43	4721	6648	0.737871	0.0171598	3	111	8137.05	8136.63	0.846512	0.838313	-16240.3	-16264.8	tg_qn+lnfi+whr_qn	lnfi+tg_qn+whr_qn
uc010utz.1	43	4721	6648	0.737871	0.0171598	2	110	8136.94	8136.63	0.633099	0.728659	-16248.5	-16264.8	tg_qn+lnfi	lnfi+tg_qn
uc010utz.1	43	4721	6648	0.737871	0.0171598	2	101	8136.88	8136.63	0.516823	0.772277	-16248.4	-16264.8	tg_qn+whr_qn	tg_qn+whr_qn
uc010utz.1	43	4721	6648	0.737871	0.0171598	1	100	8136.8	8136.63	0.353841	0.551947	-16256.7	-16264.8	tg_qn	tg_qn
uc010utz.1	43	4721	6648	0.737871	0.0171598	2	11	8136.95	8136.63	0.647865	0.723299	-16248.5	-16264.8	lnfi+whr_qn	lnfi+whr_qn
uc010utz.1	43	4721	6648	0.737871	0.0171598	1	10	8136.86	8136.63	0.467619	0.494085	-16256.8	-16264.8	lnfi	lnfi
uc010utz.1	43	4721	6648	0.737871	0.0171598	1	1	8136.68	8136.63	0.103503	0.747666	-16256.4	-16264.8	whr_qn	whr_qn
uc010bqp.2	24	4721	2291	0.267404	0.0111418	3	111	9120.18	9117.85	4.6759	0.197127	-18206.5	-18227.2	tg_qn+lnfi+whr_qn	lnfi+tg_qn+whr_qn
uc010bqp.2	24	4721	2291	0.267404	0.0111418	2	110	9118.72	9117.85	1.75589	0.415636	-18212.1	-18227.2	tg_qn+lnfi	lnfi+tg_qn
uc010bqp.2	24	4721	2291	0.267404	0.0111418	2	101	9119.81	9117.85	3.92755	0.140328	-18214.2	-18227.2	tg_qn+whr_qn	tg_qn+whr_qn
uc010bqp.2	24	4721	2291	0.267404	0.0111418	1	100	9118.51	9117.85	1.33613	0.247717	-18220.1	-18227.2	tg_qn	tg_qn
uc010bqp.2	24	4721	2291	0.267404	0.0111418	2	11	9119.64	9117.85	3.58829	0.16627	-18213.9	-18227.2	lnfi+whr_qn	lnfi+whr_qn
uc010bqp.2	24	4721	2291	0.267404	0.0111418	1	10	9118.37	9117.85	1.04108	0.30757	-18219.8	-18227.2	lnfi	lnfi
uc010bqp.2	24	4721	2291	0.267404	0.0111418	1	1	9118.8	9117.85	1.90527	0.167489	-18220.7	-18227.2	whr_qn	whr_qn
uc002cfm.2	38	4721	3167	0.370563	0.00975167	3	111	9725.5	9723.05	4.89975	0.179287	-19417.2	-19437.6	tg_qn+lnfi+whr_qn	lnfi+tg_qn+whr_qn
uc002cfm.2	38	4721	3167	0.370563	0.00975167	2	110	9723.99	9723.05	1.86893	0.392796	-19422.6	-19437.6	tg_qn+lnfi	lnfi+tg_qn
uc002cfm.2	38	4721	3167	0.370563	0.00975167	2	101	9725.15	9723.05	4.19495	0.122766	-19424.9	-19437.6	tg_qn+whr_qn	tg_qn+whr_qn
uc002cfm.2	38	4721	3167	0.370563	0.00975167	1	100	9723.8	9723.05	1.48692	0.222695	-19430.7	-19437.6	tg_qn	tg_qn
uc002cfm.2	38	4721	3167	0.370563	0.00975167	2	11	9724.88	9723.05	3.6528	0.160992	-19424.4	-19437.6	lnfi+whr_qn	lnfi+whr_qn
uc002cfm.2	38	4721	3167	0.370563	0.00975167	1	10	9723.57	9723.05	1.02842	0.31053	-19430.2	-19437.6	lnfi	lnfi
uc002cfm.2	38	4721	3167	0.370563	0.00975167	1	1	9724.04	9723.05	1.97412	0.160012	-19431.2	-19437.6	whr_qn	whr_qn
uc002cfn.2	32	4721	2310	0.269482	0.00842132	3	111	10466.3	10463.9	4.82525	0.18505	-20898.8	-20919.4	tg_qn+lnfi+whr_qn	lnfi+tg_qn+whr_qn
uc002cfn.2	32	4721	2310	0.269482	0.00842132	2	110	10464.8	10463.9	1.81533	0.403466	-20904.3	-20919.4	tg_qn+lnfi	lnfi+tg_qn
uc002cfn.2	32	4721	2310	0.269482	0.00842132	2	101	10466	10463.9	4.11821	0.127568	-20906.6	-20919.4	tg_qn+whr_qn	tg_qn+whr_qn
uc002cfn.2	32	4721	2310	0.269482	0.00842132	1	100	10464.6	10463.9	1.43109	0.231586	-20912.4	-20919.4	tg_qn	tg_qn
uc002cfn.2	32	4721	2310	0.269482	0.00842132	2	11	10465.7	10463.9	3.62931	0.162894	-20906.1	-20919.4	lnfi+whr_qn	lnfi+whr_qn
uc002cfn.2	32	4721	2310	0.269482	0.00842132	1	10	10464.4	10463.9	1.01551	0.313586	-20911.9	-20919.4	lnfi	lnfi
uc002cfn.2	32	4721	2310	0.269482	0.00842132	1	1	10464.9	10463.9	1.96765	0.160698	-20912.9	-20919.4	whr_qn	whr_qn
uc002cfo.2	32	4721	2310	0.269482	0.00842132	3	111	10466.3	10463.9	4.82525	0.18505	-20898.8	-20919.4	tg_qn+lnfi+whr_qn	lnfi+tg_qn+whr_qn
uc002cfo.2	32	4721	2310	0.269482	0.00842132	2	110	10464.8	10463.9	1.81533	0.403466	-20904.3	-20919.4	tg_qn+lnfi	lnfi+tg_qn
uc002cfo.2	32	4721	2310	0.269482	0.00842132	2	101	10466	10463.9	4.11821	0.127568	-20906.6	-20919.4	tg_qn+whr_qn	tg_qn+whr_qn
uc002cfo.2	32	4721	2310	0.269482	0.00842132	1	100	10464.6	10463.9	1.43109	0.231586	-20912.4	-20919.4	tg_qn	tg_qn
uc002cfo.2	32	4721	2310	0.269482	0.00842132	2	11	10465.7	10463.9	3.62931	0.162894	-20906.1	-20919.4	lnfi+whr_qn	lnfi+whr_qn
uc002cfo.2	32	4721	2310	0.269482	0.00842132	1	10	10464.4	10463.9	1.01551	0.313586	-20911.9	-20919.4	lnfi	lnfi
uc002cfo.2	32	4721	2310	0.269482	0.00842132	1	1	10464.9	10463.9	1.96765	0.160698	-20912.9	-20919.4	whr_qn	whr_qn
uc010uuc.1	160	4721	5488	0.602871	0.00376794	3	111	14267.7	14265.7	4.08972	0.251937	-28501.7	-28522.9	tg_qn+lnfi+whr_qn	lnfi+tg_qn+whr_qn
uc010uuc.1	160	4721	5488	0.602871	0.00376794	2	110	14267.6	14265.7	3.8836	0.143445	-28509.9	-28522.9	tg_qn+lnfi	lnfi+tg_qn
uc010uuc.1	160	4721	5488	0.602871	0.00376794	2	101	14267.7	14265.7	3.91756	0.14103	-28509.9	-28522.9	tg_qn+whr_qn	tg_qn+whr_qn
uc010uuc.1	160	4721	5488	0.602871	0.00376794	1	100	14267.5	14265.7	3.66136	0.0556882	-28518.1	-28522.9	tg_qn	tg_qn
uc010uuc.1	160	4721	5488	0.602871	0.00376794	2	11	14265.8	14265.7	0.167704	0.919567	-28506.2	-28522.9	lnfi+whr_qn	lnfi+whr_qn
uc010uuc.1	160	4721	5488	0.602871	0.00376794	1	10	14265.8	14265.7	0.10573	0.745059	-28514.6	-28522.9	lnfi	lnfi
uc010uuc.1	160	4721	5488	0.602871	0.00376794	1	1	14265.7	14265.7	0.0436026	0.834595	-28514.5	-28522.9	whr_qn	whr_qn
uc010uua.1	209	4721	7453	0.823568	0.00394052	3	111	14051.7	14049.9	3.50674	0.319889	-28069.6	-28091.4	tg_qn+lnfi+whr_qn	lnfi+tg_qn+whr_qn
uc010uua.1	209	4721	7453	0.823568	0.00394052	2	110	14051.6	14049.9	3.24353	0.197549	-28077.7	-28091.4	tg_qn+lnfi	lnfi+tg_qn
uc010uua.1	209	4721	7453	0.823568	0.00394052	2	101	14051.7	14049.9	3.46087	0.177207	-28078	-28091.4	tg_qn+whr_qn	tg_qn+whr_qn
uc010uua.1	209	4721	7453	0.823568	0.00394052	1	100	14051.5	14049.9	3.17266	0.0748802	-28086.1	-28091.4	tg_qn	tg_qn
uc010uua.1	209	4721	7453	0.823568	0.00394052	2	11	14050.1	14049.9	0.321794	0.85138	-28074.8	-28091.4	lnfi+whr_qn	lnfi+whr_qn
uc010uua.1	209	4721	7453	0.823568	0.00394052	1	10	14050.1	14049.9	0.220558	0.638615	-28083.2	-28091.4	lnfi	lnfi
uc010uua.1	209	4721	7453	0.823568	0.00394052	1	1	14050	14049.9	0.0596549	0.807042	-28083	-28091.4	whr_qn	whr_qn
uc010uub.1	209	4721	7541	0.833906	0.00398998	3	111	14028.1	14026.4	3.40839	0.332839	-28022.4	-28044.4	tg_qn+lnfi+whr_qn	lnfi+tg_qn+whr_qn
uc010uub.1	209	4721	7541	0.833906	0.00398998	2	110	14028	14026.4	3.15335	0.206662	-28030.6	-28044.4	tg_qn+lnfi	lnfi+tg_qn
uc010uub.1	209	4721	7541	0.833906	0.00398998	2	101	14028.1	14026.4	3.36992	0.185452	-28030.8	-28044.4	tg_qn+whr_qn	tg_qn+whr_qn
uc010uub.1	209	4721	7541	0.833906	0.00398998	1	100	14028	14026.4	3.09409	0.0785772	-28039	-28044.4	tg_qn	tg_qn
uc010uub.1	209	4721	7541	0.833906	0.00398998	2	11	14026.6	14026.4	0.336198	0.84527	-28027.8	-28044.4	lnfi+whr_qn	lnfi+whr_qn
uc010uub.1	209	4721	7541	0.833906	0.00398998	1	10	14026.5	14026.4	0.237515	0.626007	-28036.1	-28044.4	lnfi	lnfi
uc010uub.1	209	4721	7541	0.833906	0.00398998	1	1	14026.4	14026.4	0.0566271	0.811909	-28036	-28044.4	whr_qn	whr_qn
uc002cfq.2	209	4721	7541	0.833906	0.00398998	3	111	14028.1	14026.4	3.40839	0.332839	-28022.4	-28044.4	tg_qn+lnfi+whr_qn	lnfi+tg_qn+whr_qn
uc002cfq.2	209	4721	7541	0.833906	0.00398998	2	110	14028	14026.4	3.15335	0.206662	-28030.6	-28044.4	tg_qn+lnfi	lnfi+tg_qn
uc002cfq.2	209	4721	7541	0.833906	0.00398998	2	101	14028.1	14026.4	3.36992	0.185452	-28030.8	-28044.4	tg_qn+whr_qn	tg_qn+whr_qn
uc002cfq.2	209	4721	7541	0.833906	0.00398998	1	100	14028	14026.4	3.09409	0.0785772	-28039	-28044.4	tg_qn	tg_qn
uc002cfq.2	209	4721	7541	0.833906	0.00398998	2	11	14026.6	14026.4	0.336198	0.84527	-28027.8	-28044.4	lnfi+whr_qn	lnfi+whr_qn
uc002cfq.2	209	4721	7541	0.833906	0.00398998	1	10	14026.5	14026.4	0.237515	0.626007	-28036.1	-28044.4	lnfi	lnfi
uc002cfq.2	209	4721	7541	0.833906	0.00398998	1	1	14026.4	14026.4	0.0566271	0.811909	-28036	-28044.4	whr_qn	whr_qn
uc002cfs.1	208	4721	7540	0.8338	0.00400865	3	111	14005.5	14003.8	3.42115	0.331134	-27977.1	-27999.1	tg_qn+lnfi+whr_qn	lnfi+tg_qn+whr_qn
uc002cfs.1	208	4721	7540	0.8338	0.00400865	2	110	14005.4	14003.8	3.16687	0.205269	-27985.4	-27999.1	tg_qn+lnfi	lnfi+tg_qn
uc002cfs.1	208	4721	7540	0.8338	0.00400865	2	101	14005.5	14003.8	3.38262	0.184278	-27985.6	-27999.1	tg_qn+whr_qn	tg_qn+whr_qn
uc002cfs.1	208	4721	7540	0.8338	0.00400865	1	100	14005.3	14003.8	3.1076	0.0779278	-27993.8	-27999.1	tg_qn	tg_qn
uc002cfs.1	208	4721	7540	0.8338	0.00400865	2	11	14004	14003.8	0.33702	0.844923	-27982.5	-27999.1	lnfi+whr_qn	lnfi+whr_qn
uc002cfs.1	208	4721	7540	0.8338	0.00400865	1	10	14003.9	14003.8	0.238973	0.624949	-27990.9	-27999.1	lnfi	lnfi
uc002cfs.1	208	4721	7540	0.8338	0.00400865	1	1	14003.8	14003.8	0.056129	0.812722	-27990.7	-27999.1	whr_qn	whr_qn
uc002cfp.1	211	4721	7559	0.835846	0.00396135	3	111	14063.2	14061.4	3.44586	0.327853	-28092.5	-28114.4	tg_qn+lnfi+whr_qn	lnfi+tg_qn+whr_qn
uc002cfp.1	211	4721	7559	0.835846	0.00396135	2	110	14063	14061.4	3.17642	0.204291	-28100.7	-28114.4	tg_qn+lnfi	lnfi+tg_qn
uc002cfp.1	211	4721	7559	0.835846	0.00396135	2	101	14063.1	14061.4	3.40962	0.181807	-28100.9	-28114.4	tg_qn+whr_qn	tg_qn+whr_qn
uc002cfp.1	211	4721	7559	0.835846	0.00396135	1	100	14063	14061.4	3.11986	0.0773433	-28109.1	-28114.4	tg_qn	tg_qn
uc002cfp.1	211	4721	7559	0.835846	0.00396135	2	11	14061.6	14061.4	0.352798	0.838283	-28097.9	-28114.4	lnfi+whr_qn	lnfi+whr_qn
uc002cfp.1	211	4721	7559	0.835846	0.00396135	1	10	14061.6	14061.4	0.246134	0.619811	-28106.2	-28114.4	lnfi	lnfi
uc002cfp.1	211	4721	7559	0.835846	0.00396135	1	1	14061.5	14061.4	0.0613037	0.804447	-28106	-28114.4	whr_qn	whr_qn
uc002cfr.2	210	4721	7556	0.835528	0.0039787	3	111	14041.1	14039.4	3.44459	0.32802	-28048.3	-28070.3	tg_qn+lnfi+whr_qn	lnfi+tg_qn+whr_qn
uc002cfr.2	210	4721	7556	0.835528	0.0039787	2	110	14040.9	14039.4	3.17868	0.20406	-28056.5	-28070.3	tg_qn+lnfi	lnfi+tg_qn
uc002cfr.2	210	4721	7556	0.835528	0.0039787	2	101	14041.1	14039.4	3.40845	0.181914	-28056.7	-28070.3	tg_qn+whr_qn	tg_qn+whr_qn
uc002cfr.2	210	4721	7556	0.835528	0.0039787	1	100	14040.9	14039.4	3.1225	0.0772181	-28064.9	-28070.3	tg_qn	tg_qn
uc002cfr.2	210	4721	7556	0.835528	0.0039787	2	11	14039.5	14039.4	0.352269	0.838505	-28053.7	-28070.3	lnfi+whr_qn	lnfi+whr_qn
uc002cfr.2	210	4721	7556	0.835528	0.0039787	1	10	14039.5	14039.4	0.247641	0.618741	-28062	-28070.3	lnfi	lnfi
uc002cfr.2	210	4721	7556	0.835528	0.0039787	1	1	14039.4	14039.4	0.0598517	0.80673	-28061.9	-28070.3	whr_qn	whr_qn
uc002cft.1	2	4721	327	0.0377396	0.0188698	3	111	7001.81	7001.12	1.38114	0.709961	-13969.8	-13993.8	tg_qn+lnfi+whr_qn	lnfi+tg_qn+whr_qn
uc002cft.1	2	4721	327	0.0377396	0.0188698	2	110	7001.62	7001.12	1.01029	0.603417	-13977.9	-13993.8	tg_qn+lnfi	lnfi+tg_qn
uc002cft.1	2	4721	327	0.0377396	0.0188698	2	101	7001.6	7001.12	0.974798	0.614222	-13977.8	-13993.8	tg_qn+whr_qn	tg_qn+whr_qn
uc002cft.1	2	4721	327	0.0377396	0.0188698	1	100	7001.37	7001.12	0.512318	0.474137	-13985.8	-13993.8	tg_qn	tg_qn
uc002cft.1	2	4721	327	0.0377396	0.0188698	2	11	7001.72	7001.12	1.20434	0.547623	-13978.1	-13993.8	lnfi+whr_qn	lnfi+whr_qn
uc002cft.1	2	4721	327	0.0377396	0.0188698	1	10	7001.51	7001.12	0.778272	0.37767	-13986.1	-13993.8	lnfi	lnfi
uc002cft.1	2	4721	327	0.0377396	0.0188698	1	1	7001.43	7001.12	0.618334	0.431667	-13985.9	-13993.8	whr_qn	whr_qn
uc002cfu.1	4	4721	134	0.0144934	0.00362336	3	111	12594.7	12592	5.39015	0.145358	-25155.5	-25175.5	tg_qn+lnfi+whr_qn	lnfi+tg_qn+whr_qn
uc002cfu.1	4	4721	134	0.0144934	0.00362336	2	110	12593.9	12592	3.78717	0.150531	-25162.4	-25175.5	tg_qn+lnfi	lnfi+tg_qn
uc002cfu.1	4	4721	134	0.0144934	0.00362336	2	101	12593.7	12592	3.50111	0.173678	-25162.1	-25175.5	tg_qn+whr_qn	tg_qn+whr_qn
uc002cfu.1	4	4721	134	0.0144934	0.00362336	1	100	12592.7	12592	1.36982	0.241843	-25168.4	-25175.5	tg_qn	tg_qn
uc002cfu.1	4	4721	134	0.0144934	0.00362336	2	11	12593.1	12592	2.1763	0.336839	-25160.8	-25175.5	lnfi+whr_qn	lnfi+whr_qn
uc002cfu.1	4	4721	134	0.0144934	0.00362336	1	10	12592.5	12592	1.05007	0.305491	-25168.1	-25175.5	lnfi	lnfi
uc002cfu.1	4	4721	134	0.0144934	0.00362336	1	1	12592.7	12592	1.51661	0.218133	-25168.6	-25175.5	whr_qn	whr_qn
uc002cfv.3	1	4721	6	0.000644607	0.000644607	3	111	13385.9	13382.4	7.04869	0.0703621	-26737.9	-26756.2	tg_qn+lnfi+whr_qn	lnfi+tg_qn+whr_qn
uc002cfv.3	1	4721	6	0.000644607	0.000644607	2	110	13385.4	13382.4	6.10917	0.0471424	-26745.4	-26756.2	tg_qn+lnfi	lnfi+tg_qn
uc002cfv.3	1	4721	6	0.000644607	0.000644607	2	101	13385.4	13382.4	6.02659	0.0491296	-26745.4	-26756.2	tg_qn+whr_qn	tg_qn+whr_qn
uc002cfv.3	1	4721	6	0.000644607	0.000644607	1	100	13385	13382.4	5.317	0.0211183	-26753.1	-26756.2	tg_qn	tg_qn
uc002cfv.3	1	4721	6	0.000644607	0.000644607	2	11	13384	13382.4	3.34581	0.187701	-26742.7	-26756.2	lnfi+whr_qn	lnfi+whr_qn
uc002cfv.3	1	4721	6	0.000644607	0.000644607	1	10	13383.7	13382.4	2.79142	0.0947703	-26750.6	-26756.2	lnfi	lnfi
uc002cfv.3	1	4721	6	0.000644607	0.000644607	1	1	13382.4	13382.4	0.176127	0.674723	-26748	-26756.2	whr_qn	whr_qn
uc002cfw.2	10	4721	619	0.0684919	0.00684919	3	111	11088.4	11087.4	1.96802	0.579071	-22142.9	-22166.3	tg_qn+lnfi+whr_qn	lnfi+tg_qn+whr_qn
uc002cfw.2	10	4721	619	0.0684919	0.00684919	2	110	11087.8	11087.4	0.75555	0.685385	-22150.2	-22166.3	tg_qn+lnfi	lnfi+tg_qn
uc002cfw.2	10	4721	619	0.0684919	0.00684919	2	101	11088.3	11087.4	1.80142	0.406282	-22151.2	-22166.3	tg_qn+whr_qn	tg_qn+whr_qn
uc002cfw.2	10	4721	619	0.0684919	0.00684919	1	100	11087.6	11087.4	0.456802	0.499123	-22158.3	-22166.3	tg_qn	tg_qn
uc002cfw.2	10	4721	619	0.0684919	0.00684919	2	11	11087.9	11087.4	1.09104	0.579541	-22150.5	-22166.3	lnfi+whr_qn	lnfi+whr_qn
uc002cfw.2	10	4721	619	0.0684919	0.00684919	1	10	11087.4	11087.4	0.0903385	0.763747	-22158	-22166.3	lnfi	lnfi
uc002cfw.2	10	4721	619	0.0684919	0.00684919	1	1	11087.9	11087.4	1.05728	0.303837	-22158.9	-22166.3	whr_qn	whr_qn
uc002cfx.1	1	4721	3	0.000344669	0.000344669	3	111	15017.6	15017	1.15139	0.764684	-30001.3	-30025.6	tg_qn+lnfi+whr_qn	lnfi+tg_qn+whr_qn
uc002cfx.1	1	4721	3	0.000344669	0.000344669	2	110	15017.4	15017	0.675669	0.713313	-30009.3	-30025.6	tg_qn+lnfi	lnfi+tg_qn
uc002cfx.1	1	4721	3	0.000344669	0.000344669	2	101	15017.5	15017	0.981383	0.612203	-30009.6	-30025.6	tg_qn+whr_qn	tg_qn+whr_qn
uc002cfx.1	1	4721	3	0.000344669	0.000344669	1	100	15017.2	15017	0.416168	0.518855	-30017.5	-30025.6	tg_qn	tg_qn
uc002cfx.1	1	4721	3	0.000344669	0.000344669	2	11	15017.2	15017	0.405214	0.816599	-30009.1	-30025.6	lnfi+whr_qn	lnfi+whr_qn
uc002cfx.1	1	4721	3	0.000344669	0.000344669	1	10	15017	15017	0.056528	0.81207	-30017.2	-30025.6	lnfi	lnfi
uc002cfx.1	1	4721	3	0.000344669	0.000344669	1	1	15017.2	15017	0.390508	0.532032	-30017.5	-30025.6	whr_qn	whr_qn
uc002cfy.1	1	4721	3	0.000344669	0.000344669	3	111	15017.6	15017	1.15139	0.764684	-30001.3	-30025.6	tg_qn+lnfi+whr_qn	lnfi+tg_qn+whr_qn
uc002cfy.1	1	4721	3	0.000344669	0.000344669	2	110	15017.4	15017	0.675669	0.713313	-30009.3	-30025.6	tg_qn+lnfi	lnfi+tg_qn
uc002cfy.1	1	4721	3	0.000344669	0.000344669	2	101	15017.5	15017	0.981383	0.612203	-30009.6	-30025.6	tg_qn+whr_qn	tg_qn+whr_qn
uc002cfy.1	1	4721	3	0.000344669	0.000344669	1	100	15017.2	15017	0.416168	0.518855	-30017.5	-30025.6	tg_qn	tg_qn
uc002cfy.1	1	4721	3	0.000344669	0.000344669	2	11	15017.2	15017	0.405214	0.816599	-30009.1	-30025.6	lnfi+whr_qn	lnfi+whr_qn
uc002cfy.1	1	4721	3	0.000344669	0.000344669	1	10	15017	15017	0.056528	0.81207	-30017.2	-30025.6	lnfi	lnfi
uc002cfy.1	1	4721	3	0.000344669	0.000344669	1	1	15017.2	15017	0.390508	0.532032	-30017.5	-30025.6	whr_qn	whr_qn
uc002cfz.2	4	4721	228	0.0247097	0.00617742	3	111	11350.7	11349.7	2.04367	0.563392	-22667.5	-22690.9	tg_qn+lnfi+whr_qn	lnfi+tg_qn+whr_qn
uc002cfz.2	4	4721	228	0.0247097	0.00617742	2	110	11350.3	11349.7	1.3634	0.505757	-22675.3	-22690.9	tg_qn+lnfi	lnfi+tg_qn
uc002cfz.2	4	4721	228	0.0247097	0.00617742	2	101	11350.7	11349.7	2.02533	0.363249	-22676	-22690.9	tg_qn+whr_qn	tg_qn+whr_qn
uc002cfz.2	4	4721	228	0.0247097	0.00617742	1	100	11350.3	11349.7	1.34055	0.246936	-22683.7	-22690.9	tg_qn	tg_qn
uc002cfz.2	4	4721	228	0.0247097	0.00617742	2	11	11350	11349.7	0.612889	0.736059	-22674.6	-22690.9	lnfi+whr_qn	lnfi+whr_qn
uc002cfz.2	4	4721	228	0.0247097	0.00617742	1	10	11349.7	11349.7	0.140046	0.708235	-22682.5	-22690.9	lnfi	lnfi
uc002cfz.2	4	4721	228	0.0247097	0.00617742	1	1	11349.8	11349.7	0.372109	0.541857	-22682.8	-22690.9	whr_qn	whr_qn
uc002cgb.1	56	4721	4841	0.53584	0.00956858	3	111	11801.8	11800.2	3.37753	0.336996	-23569.8	-23591.8	tg_qn+lnfi+whr_qn	lnfi+tg_qn+whr_qn
uc002cgb.1	56	4721	4841	0.53584	0.00956858	2	110	11801.8	11800.2	3.25318	0.196599	-23578.2	-23591.8	tg_qn+lnfi	lnfi+tg_qn
uc002cgb.1	56	4721	4841	0.53584	0.00956858	2	101	11801.1	11800.2	1.92573	0.381797	-23576.8	-23591.8	tg_qn+whr_qn	tg_qn+whr_qn
uc002cgb.1	56	4721	4841	0.53584	0.00956858	1	100	11801.1	11800.2	1.87478	0.170928	-23585.3	-23591.8	tg_qn	tg_qn
uc002cgb.1	56	4721	4841	0.53584	0.00956858	2	11	11800.5	11800.2	0.659924	0.718951	-23575.6	-23591.8	lnfi+whr_qn	lnfi+whr_qn
uc002cgb.1	56	4721	4841	0.53584	0.00956858	1	10	11800.3	11800.2	0.370683	0.542632	-23583.8	-23591.8	lnfi	lnfi
uc002cgb.1	56	4721	4841	0.53584	0.00956858	1	1	11800.2	11800.2	0.182757	0.669015	-23583.6	-23591.8	whr_qn	whr_qn
uc010bqq.1	1	4721	2	0.00021427	0.00021427	3	111	15975.8	15973.6	4.2985	0.230983	-31917.7	-31938.8	tg_qn+lnfi+whr_qn	lnfi+tg_qn+whr_qn
uc010bqq.1	1	4721	2	0.00021427	0.00021427	2	110	15974.5	15973.6	1.81616	0.403297	-31923.7	-31938.8	tg_qn+lnfi	lnfi+tg_qn
uc010bqq.1	1	4721	2	0.00021427	0.00021427	2	101	15975.4	15973.6	3.48335	0.175227	-31925.4	-31938.8	tg_qn+whr_qn	tg_qn+whr_qn
uc010bqq.1	1	4721	2	0.00021427	0.00021427	1	100	15973.9	15973.6	0.557065	0.455445	-31930.9	-31938.8	tg_qn	tg_qn
uc010bqq.1	1	4721	2	0.00021427	0.00021427	2	11	15975.8	15973.6	4.29023	0.117055	-31926.2	-31938.8	lnfi+whr_qn	lnfi+whr_qn
uc010bqq.1	1	4721	2	0.00021427	0.00021427	1	10	15974.5	15973.6	1.73548	0.187713	-31932.1	-31938.8	lnfi	lnfi
uc010bqq.1	1	4721	2	0.00021427	0.00021427	1	1	15975.3	15973.6	3.29753	0.0693842	-31933.6	-31938.8	whr_qn	whr_qn
uc002cga.1	108	4721	10182	1.12156	0.0103848	3	111	12426.6	12425.9	1.55632	0.669334	-24819.4	-24843.2	tg_qn+lnfi+whr_qn	lnfi+tg_qn+whr_qn
uc002cga.1	108	4721	10182	1.12156	0.0103848	2	110	12426.4	12425.9	1.19259	0.550848	-24827.5	-24843.2	tg_qn+lnfi	lnfi+tg_qn
uc002cga.1	108	4721	10182	1.12156	0.0103848	2	101	12426.2	12425.9	0.76372	0.682591	-24827.1	-24843.2	tg_qn+whr_qn	tg_qn+whr_qn
uc002cga.1	108	4721	10182	1.12156	0.0103848	1	100	12426.1	12425.9	0.520077	0.470809	-24835.3	-24843.2	tg_qn	tg_qn
uc002cga.1	108	4721	10182	1.12156	0.0103848	2	11	12426.2	12425.9	0.766912	0.681502	-24827.1	-24843.2	lnfi+whr_qn	lnfi+whr_qn
uc002cga.1	108	4721	10182	1.12156	0.0103848	1	10	12426	12425.9	0.261469	0.609113	-24835	-24843.2	lnfi	lnfi
uc002cga.1	108	4721	10182	1.12156	0.0103848	1	1	12426	12425.9	0.370391	0.542791	-24835.2	-24843.2	whr_qn	whr_qn
uc002cgc.1	108	4721	10182	1.12156	0.0103848	3	111	12426.6	12425.9	1.55632	0.669334	-24819.4	-24843.2	tg_qn+lnfi+whr_qn	lnfi+tg_qn+whr_qn
uc002cgc.1	108	4721	10182	1.12156	0.0103848	2	110	12426.4	12425.9	1.19259	0.550848	-24827.5	-24843.2	tg_qn+lnfi	lnfi+tg_qn
uc002cgc.1	108	4721	10182	1.12156	0.0103848	2	101	12426.2	12425.9	0.76372	0.682591	-24827.1	-24843.2	tg_qn+whr_qn	tg_qn+whr_qn
uc002cgc.1	108	4721	10182	1.12156	0.0103848	1	100	12426.1	12425.9	0.520077	0.470809	-24835.3	-24843.2	tg_qn	tg_qn
uc002cgc.1	108	4721	10182	1.12156	0.0103848	2	11	12426.2	12425.9	0.766912	0.681502	-24827.1	-24843.2	lnfi+whr_qn	lnfi+whr_qn
uc002cgc.1	108	4721	10182	1.12156	0.0103848	1	10	12426	12425.9	0.261469	0.609113	-24835	-24843.2	lnfi	lnfi
uc002cgc.1	108	4721	10182	1.12156	0.0103848	1	1	12426	12425.9	0.370391	0.542791	-24835.2	-24843.2	whr_qn	whr_qn
uc002cgd.1	108	4721	10182	1.12156	0.0103848	3	111	12426.6	12425.9	1.55632	0.669334	-24819.4	-24843.2	tg_qn+lnfi+whr_qn	lnfi+tg_qn+whr_qn
uc002cgd.1	108	4721	10182	1.12156	0.0103848	2	110	12426.4	12425.9	1.19259	0.550848	-24827.5	-24843.2	tg_qn+lnfi	lnfi+tg_qn
uc002cgd.1	108	4721	10182	1.12156	0.0103848	2	101	12426.2	12425.9	0.76372	0.682591	-24827.1	-24843.2	tg_qn+whr_qn	tg_qn+whr_qn
uc002cgd.1	108	4721	10182	1.12156	0.0103848	1	100	12426.1	12425.9	0.520077	0.470809	-24835.3	-24843.2	tg_qn	tg_qn
uc002cgd.1	108	4721	10182	1.12156	0.0103848	2	11	12426.2	12425.9	0.766912	0.681502	-24827.1	-24843.2	lnfi+whr_qn	lnfi+whr_qn
uc002cgd.1	108	4721	10182	1.12156	0.0103848	1	10	12426	12425.9	0.261469	0.609113	-24835	-24843.2	lnfi	lnfi
uc002cgd.1	108	4721	10182	1.12156	0.0103848	1	1	12426	12425.9	0.370391	0.542791	-24835.2	-24843.2	whr_qn	whr_qn
uc002cge.1	108	4721	10182	1.12156	0.0103848	3	111	12426.6	12425.9	1.55632	0.669334	-24819.4	-24843.2	tg_qn+lnfi+whr_qn	lnfi+tg_qn+whr_qn
uc002cge.1	108	4721	10182	1.12156	0.0103848	2	110	12426.4	12425.9	1.19259	0.550848	-24827.5	-24843.2	tg_qn+lnfi	lnfi+tg_qn
uc002cge.1	108	4721	10182	1.12156	0.0103848	2	101	12426.2	12425.9	0.76372	0.682591	-24827.1	-24843.2	tg_qn+whr_qn	tg_qn+whr_qn
uc002cge.1	108	4721	10182	1.12156	0.0103848	1	100	12426.1	12425.9	0.520077	0.470809	-24835.3	-24843.2	tg_qn	tg_qn
uc002cge.1	108	4721	10182	1.12156	0.0103848	2	11	12426.2	12425.9	0.766912	0.681502	-24827.1	-24843.2	lnfi+whr_qn	lnfi+whr_qn
uc002cge.1	108	4721	10182	1.12156	0.0103848	1	10	12426	12425.9	0.261469	0.609113	-24835	-24843.2	lnfi	lnfi
uc002cge.1	108	4721	10182	1.12156	0.0103848	1	1	12426	12425.9	0.370391	0.542791	-24835.2	-24843.2	whr_qn	whr_qn
uc010bqr.2	115	4721	3702	0.407359	0.00354225	3	111	16138.1	16137.9	0.418847	0.936322	-32242.4	-32267.4	tg_qn+lnfi+whr_qn	lnfi+tg_qn+whr_qn
uc010bqr.2	115	4721	3702	0.407359	0.00354225	2	110	16138.1	16137.9	0.330592	0.847643	-32250.8	-32267.4	tg_qn+lnfi	lnfi+tg_qn
uc010bqr.2	115	4721	3702	0.407359	0.00354225	2	101	16138	16137.9	0.0702168	0.965501	-32250.5	-32267.4	tg_qn+whr_qn	tg_qn+whr_qn
uc010bqr.2	115	4721	3702	0.407359	0.00354225	1	100	16137.9	16137.9	0.0179505	0.893419	-32258.9	-32267.4	tg_qn	tg_qn
uc010bqr.2	115	4721	3702	0.407359	0.00354225	2	11	16138.1	16137.9	0.399874	0.818782	-32250.9	-32267.4	lnfi+whr_qn	lnfi+whr_qn
uc010bqr.2	115	4721	3702	0.407359	0.00354225	1	10	16138.1	16137.9	0.304056	0.581351	-32259.2	-32267.4	lnfi	lnfi
uc010bqr.2	115	4721	3702	0.407359	0.00354225	1	1	16137.9	16137.9	0.045704	0.830715	-32259	-32267.4	whr_qn	whr_qn
uc002cgf.2	122	4721	3919	0.431606	0.00353775	3	111	16356.3	16356.2	0.238555	0.971137	-32678.7	-32703.9	tg_qn+lnfi+whr_qn	lnfi+tg_qn+whr_qn
uc002cgf.2	122	4721	3919	0.431606	0.00353775	2	110	16356.2	16356.2	0.14145	0.931718	-32687.1	-32703.9	tg_qn+lnfi	lnfi+tg_qn
uc002cgf.2	122	4721	3919	0.431606	0.00353775	2	101	16356.2	16356.2	0.0849197	0.958429	-32687	-32703.9	tg_qn+whr_qn	tg_qn+whr_qn
uc002cgf.2	122	4721	3919	0.431606	0.00353775	1	100	16356.2	16356.2	0.0133665	0.907959	-32695.4	-32703.9	tg_qn	tg_qn
uc002cgf.2	122	4721	3919	0.431606	0.00353775	2	11	16356.3	16356.2	0.225068	0.893567	-32687.2	-32703.9	lnfi+whr_qn	lnfi+whr_qn
uc002cgf.2	122	4721	3919	0.431606	0.00353775	1	10	16356.2	16356.2	0.122951	0.725856	-32695.5	-32703.9	lnfi	lnfi
uc002cgf.2	122	4721	3919	0.431606	0.00353775	1	1	16356.2	16356.2	0.0663533	0.796722	-32695.5	-32703.9	whr_qn	whr_qn
uc002cgh.2	61	4721	1979	0.220456	0.00361403	3	111	16129.7	16129.5	0.400341	0.940172	-32225.5	-32250.4	tg_qn+lnfi+whr_qn	lnfi+tg_qn+whr_qn
uc002cgh.2	61	4721	1979	0.220456	0.00361403	2	110	16129.6	16129.5	0.239674	0.887065	-32233.8	-32250.4	tg_qn+lnfi	lnfi+tg_qn
uc002cgh.2	61	4721	1979	0.220456	0.00361403	2	101	16129.6	16129.5	0.386497	0.824277	-32233.9	-32250.4	tg_qn+whr_qn	tg_qn+whr_qn
uc002cgh.2	61	4721	1979	0.220456	0.00361403	1	100	16129.6	16129.5	0.214142	0.64354	-32242.2	-32250.4	tg_qn	tg_qn
uc002cgh.2	61	4721	1979	0.220456	0.00361403	2	11	16129.5	16129.5	0.127692	0.938149	-32233.6	-32250.4	lnfi+whr_qn	lnfi+whr_qn
uc002cgh.2	61	4721	1979	0.220456	0.00361403	1	10	16129.5	16129.5	0.00928094	0.923252	-32242	-32250.4	lnfi	lnfi
uc002cgh.2	61	4721	1979	0.220456	0.00361403	1	1	16129.5	16129.5	0.11005	0.740087	-32242.1	-32250.4	whr_qn	whr_qn
uc002cgg.2	138	4721	4113	0.452739	0.00328071	3	111	16537.3	16537.1	0.281339	0.963499	-33040.7	-33065.8	tg_qn+lnfi+whr_qn	lnfi+tg_qn+whr_qn
uc002cgg.2	138	4721	4113	0.452739	0.00328071	2	110	16537.2	16537.1	0.154997	0.925428	-33049.1	-33065.8	tg_qn+lnfi	lnfi+tg_qn
uc002cgg.2	138	4721	4113	0.452739	0.00328071	2	101	16537.2	16537.1	0.111158	0.945937	-33049	-33065.8	tg_qn+whr_qn	tg_qn+whr_qn
uc002cgg.2	138	4721	4113	0.452739	0.00328071	1	100	16537.2	16537.1	0.0160643	0.899142	-33057.4	-33065.8	tg_qn	tg_qn
uc002cgg.2	138	4721	4113	0.452739	0.00328071	2	11	16537.3	16537.1	0.268694	0.874287	-33049.2	-33065.8	lnfi+whr_qn	lnfi+whr_qn
uc002cgg.2	138	4721	4113	0.452739	0.00328071	1	10	16537.2	16537.1	0.137982	0.710295	-33057.5	-33065.8	lnfi	lnfi
uc002cgg.2	138	4721	4113	0.452739	0.00328071	1	1	16537.2	16537.1	0.0865087	0.768664	-33057.5	-33065.8	whr_qn	whr_qn
uc010uud.1	142	4721	4207	0.463034	0.0032608	3	111	16469.6	16469.4	0.290791	0.961751	-32905.3	-32930.4	tg_qn+lnfi+whr_qn	lnfi+tg_qn+whr_qn
uc010uud.1	142	4721	4207	0.463034	0.0032608	2	110	16469.5	16469.4	0.196628	0.906364	-32913.7	-32930.4	tg_qn+lnfi	lnfi+tg_qn
uc010uud.1	142	4721	4207	0.463034	0.0032608	2	101	16469.5	16469.4	0.0904443	0.955785	-32913.6	-32930.4	tg_qn+whr_qn	tg_qn+whr_qn
uc010uud.1	142	4721	4207	0.463034	0.0032608	1	100	16469.4	16469.4	0.0249076	0.874598	-32922	-32930.4	tg_qn	tg_qn
uc010uud.1	142	4721	4207	0.463034	0.0032608	2	11	16469.6	16469.4	0.279324	0.869652	-32913.7	-32930.4	lnfi+whr_qn	lnfi+whr_qn
uc010uud.1	142	4721	4207	0.463034	0.0032608	1	10	16469.5	16469.4	0.183401	0.668466	-32922.1	-32930.4	lnfi	lnfi
uc010uud.1	142	4721	4207	0.463034	0.0032608	1	1	16469.5	16469.4	0.0552688	0.814136	-32922	-32930.4	whr_qn	whr_qn
uc002cgi.1	35	4721	1014	0.110559	0.00315883	3	111	14937.2	14937	0.321262	0.955981	-29840.5	-29865.6	tg_qn+lnfi+whr_qn	lnfi+tg_qn+whr_qn
uc002cgi.1	35	4721	1014	0.110559	0.00315883	2	110	14937.2	14937	0.28897	0.865468	-29849	-29865.6	tg_qn+lnfi	lnfi+tg_qn
uc002cgi.1	35	4721	1014	0.110559	0.00315883	2	101	14937.2	14937	0.271463	0.873077	-29848.9	-29865.6	tg_qn+whr_qn	tg_qn+whr_qn
uc002cgi.1	35	4721	1014	0.110559	0.00315883	1	100	14937.1	14937	0.238893	0.625007	-29857.4	-29865.6	tg_qn	tg_qn
uc002cgi.1	35	4721	1014	0.110559	0.00315883	2	11	14937.1	14937	0.150971	0.927293	-29848.8	-29865.6	lnfi+whr_qn	lnfi+whr_qn
uc002cgi.1	35	4721	1014	0.110559	0.00315883	1	10	14937.1	14937	0.116451	0.732916	-29857.3	-29865.6	lnfi	lnfi
uc002cgi.1	35	4721	1014	0.110559	0.00315883	1	1	14937	14937	0.0419662	0.837684	-29857.2	-29865.6	whr_qn	whr_qn
uc002cgj.1	35	4721	1014	0.110559	0.00315883	3	111	14937.2	14937	0.321262	0.955981	-29840.5	-29865.6	tg_qn+lnfi+whr_qn	lnfi+tg_qn+whr_qn
uc002cgj.1	35	4721	1014	0.110559	0.00315883	2	110	14937.2	14937	0.28897	0.865468	-29849	-29865.6	tg_qn+lnfi	lnfi+tg_qn
uc002cgj.1	35	4721	1014	0.110559	0.00315883	2	101	14937.2	14937	0.271463	0.873077	-29848.9	-29865.6	tg_qn+whr_qn	tg_qn+whr_qn
uc002cgj.1	35	4721	1014	0.110559	0.00315883	1	100	14937.1	14937	0.238893	0.625007	-29857.4	-29865.6	tg_qn	tg_qn
uc002cgj.1	35	4721	1014	0.110559	0.00315883	2	11	14937.1	14937	0.150971	0.927293	-29848.8	-29865.6	lnfi+whr_qn	lnfi+whr_qn
uc002cgj.1	35	4721	1014	0.110559	0.00315883	1	10	14937.1	14937	0.116451	0.732916	-29857.3	-29865.6	lnfi	lnfi
uc002cgj.1	35	4721	1014	0.110559	0.00315883	1	1	14937	14937	0.0419662	0.837684	-29857.2	-29865.6	whr_qn	whr_qn
uc010bqs.1	35	4721	1014	0.110559	0.00315883	3	111	14937.2	14937	0.321262	0.955981	-29840.5	-29865.6	tg_qn+lnfi+whr_qn	lnfi+tg_qn+whr_qn
uc010bqs.1	35	4721	1014	0.110559	0.00315883	2	110	14937.2	14937	0.28897	0.865468	-29849	-29865.6	tg_qn+lnfi	lnfi+tg_qn
uc010bqs.1	35	4721	1014	0.110559	0.00315883	2	101	14937.2	14937	0.271463	0.873077	-29848.9	-29865.6	tg_qn+whr_qn	tg_qn+whr_qn
uc010bqs.1	35	4721	1014	0.110559	0.00315883	1	100	14937.1	14937	0.238893	0.625007	-29857.4	-29865.6	tg_qn	tg_qn
uc010bqs.1	35	4721	1014	0.110559	0.00315883	2	11	14937.1	14937	0.150971	0.927293	-29848.8	-29865.6	lnfi+whr_qn	lnfi+whr_qn
uc010bqs.1	35	4721	1014	0.110559	0.00315883	1	10	14937.1	14937	0.116451	0.732916	-29857.3	-29865.6	lnfi	lnfi
uc010bqs.1	35	4721	1014	0.110559	0.00315883	1	1	14937	14937	0.0419662	0.837684	-29857.2	-29865.6	whr_qn	whr_qn
uc002cgk.1	35	4721	1014	0.110559	0.00315883	3	111	14937.2	14937	0.321262	0.955981	-29840.5	-29865.6	tg_qn+lnfi+whr_qn	lnfi+tg_qn+whr_qn
uc002cgk.1	35	4721	1014	0.110559	0.00315883	2	110	14937.2	14937	0.28897	0.865468	-29849	-29865.6	tg_qn+lnfi	lnfi+tg_qn
uc002cgk.1	35	4721	1014	0.110559	0.00315883	2	101	14937.2	14937	0.271463	0.873077	-29848.9	-29865.6	tg_qn+whr_qn	tg_qn+whr_qn
uc002cgk.1	35	4721	1014	0.110559	0.00315883	1	100	14937.1	14937	0.238893	0.625007	-29857.4	-29865.6	tg_qn	tg_qn
uc002cgk.1	35	4721	1014	0.110559	0.00315883	2	11	14937.1	14937	0.150971	0.927293	-29848.8	-29865.6	lnfi+whr_qn	lnfi+whr_qn
uc002cgk.1	35	4721	1014	0.110559	0.00315883	1	10	14937.1	14937	0.116451	0.732916	-29857.3	-29865.6	lnfi	lnfi
uc002cgk.1	35	4721	1014	0.110559	0.00315883	1	1	14937	14937	0.0419662	0.837684	-29857.2	-29865.6	whr_qn	whr_qn
uc010uue.1	16	4721	300	0.0333844	0.00208652	3	111	16180	16178.1	3.76803	0.287627	-32326.2	-32347.8	tg_qn+lnfi+whr_qn	lnfi+tg_qn+whr_qn
uc010uue.1	16	4721	300	0.0333844	0.00208652	2	110	16179.2	16178.1	2.1541	0.340598	-32333	-32347.8	tg_qn+lnfi	lnfi+tg_qn
uc010uue.1	16	4721	300	0.0333844	0.00208652	2	101	16179.8	16178.1	3.27689	0.194282	-32334.2	-32347.8	tg_qn+whr_qn	tg_qn+whr_qn
uc010uue.1	16	4721	300	0.0333844	0.00208652	1	100	16178.8	16178.1	1.3933	0.237848	-32340.7	-32347.8	tg_qn	tg_qn
uc010uue.1	16	4721	300	0.0333844	0.00208652	2	11	16178.8	16178.1	1.35948	0.506749	-32332.2	-32347.8	lnfi+whr_qn	lnfi+whr_qn
uc010uue.1	16	4721	300	0.0333844	0.00208652	1	10	16178.2	16178.1	0.160017	0.689141	-32339.5	-32347.8	lnfi	lnfi
uc010uue.1	16	4721	300	0.0333844	0.00208652	1	1	16178.8	16178.1	1.31006	0.252383	-32340.6	-32347.8	whr_qn	whr_qn
uc002cgm.1	7	4721	705	0.0816938	0.0116705	3	111	9575.77	9575.36	0.80323	0.848694	-19117.7	-19142.3	tg_qn+lnfi+whr_qn	lnfi+tg_qn+whr_qn
uc002cgm.1	7	4721	705	0.0816938	0.0116705	2	110	9575.46	9575.36	0.193952	0.907578	-19125.5	-19142.3	tg_qn+lnfi	lnfi+tg_qn
uc002cgm.1	7	4721	705	0.0816938	0.0116705	2	101	9575.77	9575.36	0.804487	0.668818	-19126.2	-19142.3	tg_qn+whr_qn	tg_qn+whr_qn
uc002cgm.1	7	4721	705	0.0816938	0.0116705	1	100	9575.46	9575.36	0.199689	0.654972	-19134	-19142.3	tg_qn	tg_qn
uc002cgm.1	7	4721	705	0.0816938	0.0116705	2	11	9575.71	9575.36	0.699608	0.704826	-19126	-19142.3	lnfi+whr_qn	lnfi+whr_qn
uc002cgm.1	7	4721	705	0.0816938	0.0116705	1	10	9575.38	9575.36	0.0263659	0.87101	-19133.8	-19142.3	lnfi	lnfi
uc002cgm.1	7	4721	705	0.0816938	0.0116705	1	1	9575.72	9575.36	0.705299	0.401009	-19134.5	-19142.3	whr_qn	whr_qn
uc002cgn.1	34	4721	2154	0.241319	0.0070976	3	111	13625.7	13624.6	2.10819	0.550259	-27217.5	-27240.8	tg_qn+lnfi+whr_qn	lnfi+tg_qn+whr_qn
uc002cgn.1	34	4721	2154	0.241319	0.0070976	2	110	13625.4	13624.6	1.66243	0.43552	-27225.5	-27240.8	tg_qn+lnfi	lnfi+tg_qn
uc002cgn.1	34	4721	2154	0.241319	0.0070976	2	101	13625.6	13624.6	1.98678	0.37032	-27225.8	-27240.8	tg_qn+whr_qn	tg_qn+whr_qn
uc002cgn.1	34	4721	2154	0.241319	0.0070976	1	100	13625.4	13624.6	1.47518	0.22453	-27233.8	-27240.8	tg_qn	tg_qn
uc002cgn.1	34	4721	2154	0.241319	0.0070976	2	11	13624.8	13624.6	0.285972	0.866766	-27224.1	-27240.8	lnfi+whr_qn	lnfi+whr_qn
uc002cgn.1	34	4721	2154	0.241319	0.0070976	1	10	13624.6	13624.6	0.0204447	0.886302	-27232.3	-27240.8	lnfi	lnfi
uc002cgn.1	34	4721	2154	0.241319	0.0070976	1	1	13624.7	13624.6	0.245718	0.620106	-27232.6	-27240.8	whr_qn	whr_qn
uc002cgo.1	30	4721	1765	0.195824	0.00652747	3	111	13443.3	13441.8	3.01471	0.389362	-26852.7	-26875	tg_qn+lnfi+whr_qn	lnfi+tg_qn+whr_qn
uc002cgo.1	30	4721	1765	0.195824	0.00652747	2	110	13442.4	13441.8	1.32809	0.514765	-26859.5	-26875	tg_qn+lnfi	lnfi+tg_qn
uc002cgo.1	30	4721	1765	0.195824	0.00652747	2	101	13443.2	13441.8	2.93363	0.230659	-26861.1	-26875	tg_qn+whr_qn	tg_qn+whr_qn
uc002cgo.1	30	4721	1765	0.195824	0.00652747	1	100	13442.3	13441.8	1.12571	0.288693	-26867.7	-26875	tg_qn	tg_qn
uc002cgo.1	30	4721	1765	0.195824	0.00652747	2	11	13442.4	13441.8	1.34535	0.510342	-26859.5	-26875	lnfi+whr_qn	lnfi+whr_qn
uc002cgo.1	30	4721	1765	0.195824	0.00652747	1	10	13441.8	13441.8	0.0135147	0.907452	-26866.6	-26875	lnfi	lnfi
uc002cgo.1	30	4721	1765	0.195824	0.00652747	1	1	13442.4	13441.8	1.29337	0.255427	-26867.9	-26875	whr_qn	whr_qn
uc010bqt.1	30	4721	1765	0.195824	0.00652747	3	111	13443.3	13441.8	3.01471	0.389362	-26852.7	-26875	tg_qn+lnfi+whr_qn	lnfi+tg_qn+whr_qn
uc010bqt.1	30	4721	1765	0.195824	0.00652747	2	110	13442.4	13441.8	1.32809	0.514765	-26859.5	-26875	tg_qn+lnfi	lnfi+tg_qn
uc010bqt.1	30	4721	1765	0.195824	0.00652747	2	101	13443.2	13441.8	2.93363	0.230659	-26861.1	-26875	tg_qn+whr_qn	tg_qn+whr_qn
uc010bqt.1	30	4721	1765	0.195824	0.00652747	1	100	13442.3	13441.8	1.12571	0.288693	-26867.7	-26875	tg_qn	tg_qn
uc010bqt.1	30	4721	1765	0.195824	0.00652747	2	11	13442.4	13441.8	1.34535	0.510342	-26859.5	-26875	lnfi+whr_qn	lnfi+whr_qn
uc010bqt.1	30	4721	1765	0.195824	0.00652747	1	10	13441.8	13441.8	0.0135147	0.907452	-26866.6	-26875	lnfi	lnfi
uc010bqt.1	30	4721	1765	0.195824	0.00652747	1	1	13442.4	13441.8	1.29337	0.255427	-26867.9	-26875	whr_qn	whr_qn
uc002cgp.1	226	4721	9689	1.06027	0.00469146	3	111	16413	16412.5	0.996079	0.802201	-32792.1	-32816.5	tg_qn+lnfi+whr_qn	lnfi+tg_qn+whr_qn
uc002cgp.1	226	4721	9689	1.06027	0.00469146	2	110	16412.7	16412.5	0.415542	0.812393	-32800	-32816.5	tg_qn+lnfi	lnfi+tg_qn
uc002cgp.1	226	4721	9689	1.06027	0.00469146	2	101	16413	16412.5	0.950156	0.621837	-32800.5	-32816.5	tg_qn+whr_qn	tg_qn+whr_qn
uc002cgp.1	226	4721	9689	1.06027	0.00469146	1	100	16412.6	16412.5	0.321873	0.570484	-32808.4	-32816.5	tg_qn	tg_qn
uc002cgp.1	226	4721	9689	1.06027	0.00469146	2	11	16412.7	16412.5	0.484876	0.784712	-32800.1	-32816.5	lnfi+whr_qn	lnfi+whr_qn
uc002cgp.1	226	4721	9689	1.06027	0.00469146	1	10	16412.5	16412.5	0.0174374	0.894944	-32808.1	-32816.5	lnfi	lnfi
uc002cgp.1	226	4721	9689	1.06027	0.00469146	1	1	16412.7	16412.5	0.466935	0.494401	-32808.5	-32816.5	whr_qn	whr_qn
uc002cgq.1	226	4721	9689	1.06027	0.00469146	3	111	16413	16412.5	0.996079	0.802201	-32792.1	-32816.5	tg_qn+lnfi+whr_qn	lnfi+tg_qn+whr_qn
uc002cgq.1	226	4721	9689	1.06027	0.00469146	2	110	16412.7	16412.5	0.415542	0.812393	-32800	-32816.5	tg_qn+lnfi	lnfi+tg_qn
uc002cgq.1	226	4721	9689	1.06027	0.00469146	2	101	16413	16412.5	0.950156	0.621837	-32800.5	-32816.5	tg_qn+whr_qn	tg_qn+whr_qn
uc002cgq.1	226	4721	9689	1.06027	0.00469146	1	100	16412.6	16412.5	0.321873	0.570484	-32808.4	-32816.5	tg_qn	tg_qn
uc002cgq.1	226	4721	9689	1.06027	0.00469146	2	11	16412.7	16412.5	0.484876	0.784712	-32800.1	-32816.5	lnfi+whr_qn	lnfi+whr_qn
uc002cgq.1	226	4721	9689	1.06027	0.00469146	1	10	16412.5	16412.5	0.0174374	0.894944	-32808.1	-32816.5	lnfi	lnfi
uc002cgq.1	226	4721	9689	1.06027	0.00469146	1	1	16412.7	16412.5	0.466935	0.494401	-32808.5	-32816.5	whr_qn	whr_qn
uc010bqu.1	16	4721	663	0.072202	0.00451263	3	111	13725	13724.9	0.23211	0.972246	-27416.2	-27441.4	tg_qn+lnfi+whr_qn	lnfi+tg_qn+whr_qn
uc010bqu.1	16	4721	663	0.072202	0.00451263	2	110	13725	13724.9	0.193773	0.907659	-27424.6	-27441.4	tg_qn+lnfi	lnfi+tg_qn
uc010bqu.1	16	4721	663	0.072202	0.00451263	2	101	13725	13724.9	0.137207	0.933697	-27424.6	-27441.4	tg_qn+whr_qn	tg_qn+whr_qn
uc010bqu.1	16	4721	663	0.072202	0.00451263	1	100	13725	13724.9	0.0828289	0.7735	-27433	-27441.4	tg_qn	tg_qn
uc010bqu.1	16	4721	663	0.072202	0.00451263	2	11	13724.9	13724.9	0.0659634	0.967556	-27424.5	-27441.4	lnfi+whr_qn	lnfi+whr_qn
uc010bqu.1	16	4721	663	0.072202	0.00451263	1	10	13724.9	13724.9	0.0423807	0.836896	-27433	-27441.4	lnfi	lnfi
uc010bqu.1	16	4721	663	0.072202	0.00451263	1	1	13724.9	13724.9	0.0325417	0.856844	-27432.9	-27441.4	whr_qn	whr_qn
uc002cgr.1	16	4721	663	0.072202	0.00451263	3	111	13725	13724.9	0.23211	0.972246	-27416.2	-27441.4	tg_qn+lnfi+whr_qn	lnfi+tg_qn+whr_qn
uc002cgr.1	16	4721	663	0.072202	0.00451263	2	110	13725	13724.9	0.193773	0.907659	-27424.6	-27441.4	tg_qn+lnfi	lnfi+tg_qn
uc002cgr.1	16	4721	663	0.072202	0.00451263	2	101	13725	13724.9	0.137207	0.933697	-27424.6	-27441.4	tg_qn+whr_qn	tg_qn+whr_qn
uc002cgr.1	16	4721	663	0.072202	0.00451263	1	100	13725	13724.9	0.0828289	0.7735	-27433	-27441.4	tg_qn	tg_qn
uc002cgr.1	16	4721	663	0.072202	0.00451263	2	11	13724.9	13724.9	0.0659634	0.967556	-27424.5	-27441.4	lnfi+whr_qn	lnfi+whr_qn
uc002cgr.1	16	4721	663	0.072202	0.00451263	1	10	13724.9	13724.9	0.0423807	0.836896	-27433	-27441.4	lnfi	lnfi
uc002cgr.1	16	4721	663	0.072202	0.00451263	1	1	13724.9	13724.9	0.0325417	0.856844	-27432.9	-27441.4	whr_qn	whr_qn
uc002cgs.1	16	4721	663	0.072202	0.00451263	3	111	13725	13724.9	0.23211	0.972246	-27416.2	-27441.4	tg_qn+lnfi+whr_qn	lnfi+tg_qn+whr_qn
uc002cgs.1	16	4721	663	0.072202	0.00451263	2	110	13725	13724.9	0.193773	0.907659	-27424.6	-27441.4	tg_qn+lnfi	lnfi+tg_qn
uc002cgs.1	16	4721	663	0.072202	0.00451263	2	101	13725	13724.9	0.137207	0.933697	-27424.6	-27441.4	tg_qn+whr_qn	tg_qn+whr_qn
uc002cgs.1	16	4721	663	0.072202	0.00451263	1	100	13725	13724.9	0.0828289	0.7735	-27433	-27441.4	tg_qn	tg_qn
uc002cgs.1	16	4721	663	0.072202	0.00451263	2	11	13724.9	13724.9	0.0659634	0.967556	-27424.5	-27441.4	lnfi+whr_qn	lnfi+whr_qn
uc002cgs.1	16	4721	663	0.072202	0.00451263	1	10	13724.9	13724.9	0.0423807	0.836896	-27433	-27441.4	lnfi	lnfi
uc002cgs.1	16	4721	663	0.072202	0.00451263	1	1	13724.9	13724.9	0.0325417	0.856844	-27432.9	-27441.4	whr_qn	whr_qn
uc002cgt.1	16	4721	663	0.072202	0.00451263	3	111	13725	13724.9	0.23211	0.972246	-27416.2	-27441.4	tg_qn+lnfi+whr_qn	lnfi+tg_qn+whr_qn
uc002cgt.1	16	4721	663	0.072202	0.00451263	2	110	13725	13724.9	0.193773	0.907659	-27424.6	-27441.4	tg_qn+lnfi	lnfi+tg_qn
uc002cgt.1	16	4721	663	0.072202	0.00451263	2	101	13725	13724.9	0.137207	0.933697	-27424.6	-27441.4	tg_qn+whr_qn	tg_qn+whr_qn
uc002cgt.1	16	4721	663	0.072202	0.00451263	1	100	13725	13724.9	0.0828289	0.7735	-27433	-27441.4	tg_qn	tg_qn
uc002cgt.1	16	4721	663	0.072202	0.00451263	2	11	13724.9	13724.9	0.0659634	0.967556	-27424.5	-27441.4	lnfi+whr_qn	lnfi+whr_qn
uc002cgt.1	16	4721	663	0.072202	0.00451263	1	10	13724.9	13724.9	0.0423807	0.836896	-27433	-27441.4	lnfi	lnfi
uc002cgt.1	16	4721	663	0.072202	0.00451263	1	1	13724.9	13724.9	0.0325417	0.856844	-27432.9	-27441.4	whr_qn	whr_qn
uc002cgu.3	40	4721	2337	0.252489	0.00631222	3	111	12030.4	12028.7	3.36914	0.338135	-24027	-24049	tg_qn+lnfi+whr_qn	lnfi+tg_qn+whr_qn
uc002cgu.3	40	4721	2337	0.252489	0.00631222	2	110	12028.9	12028.7	0.434542	0.804712	-24032.5	-24049	tg_qn+lnfi	lnfi+tg_qn
uc002cgu.3	40	4721	2337	0.252489	0.00631222	2	101	12030.3	12028.7	3.23465	0.198429	-24035.3	-24049	tg_qn+whr_qn	tg_qn+whr_qn
uc002cgu.3	40	4721	2337	0.252489	0.00631222	1	100	12028.8	12028.7	0.0830393	0.77322	-24040.6	-24049	tg_qn	tg_qn
uc002cgu.3	40	4721	2337	0.252489	0.00631222	2	11	12030.2	12028.7	2.91999	0.232237	-24035	-24049	lnfi+whr_qn	lnfi+whr_qn
uc002cgu.3	40	4721	2337	0.252489	0.00631222	1	10	12028.8	12028.7	0.210205	0.646606	-24040.7	-24049	lnfi	lnfi
uc002cgu.3	40	4721	2337	0.252489	0.00631222	1	1	12030.2	12028.7	2.89132	0.0890581	-24043.4	-24049	whr_qn	whr_qn
uc002cgv.3	40	4721	2337	0.252489	0.00631222	3	111	12030.4	12028.7	3.36914	0.338135	-24027	-24049	tg_qn+lnfi+whr_qn	lnfi+tg_qn+whr_qn
uc002cgv.3	40	4721	2337	0.252489	0.00631222	2	110	12028.9	12028.7	0.434542	0.804712	-24032.5	-24049	tg_qn+lnfi	lnfi+tg_qn
uc002cgv.3	40	4721	2337	0.252489	0.00631222	2	101	12030.3	12028.7	3.23465	0.198429	-24035.3	-24049	tg_qn+whr_qn	tg_qn+whr_qn
uc002cgv.3	40	4721	2337	0.252489	0.00631222	1	100	12028.8	12028.7	0.0830393	0.77322	-24040.6	-24049	tg_qn	tg_qn
uc002cgv.3	40	4721	2337	0.252489	0.00631222	2	11	12030.2	12028.7	2.91999	0.232237	-24035	-24049	lnfi+whr_qn	lnfi+whr_qn
uc002cgv.3	40	4721	2337	0.252489	0.00631222	1	10	12028.8	12028.7	0.210205	0.646606	-24040.7	-24049	lnfi	lnfi
uc002cgv.3	40	4721	2337	0.252489	0.00631222	1	1	12030.2	12028.7	2.89132	0.0890581	-24043.4	-24049	whr_qn	whr_qn
uc002cgx.3	1	4721	18	0.0019305	0.0019305	3	111	10797.8	10795.1	5.3631	0.14706	-21561.7	-21581.7	tg_qn+lnfi+whr_qn	lnfi+tg_qn+whr_qn
uc002cgx.3	1	4721	18	0.0019305	0.0019305	2	110	10796	10795.1	1.82169	0.402184	-21566.6	-21581.7	tg_qn+lnfi	lnfi+tg_qn
uc002cgx.3	1	4721	18	0.0019305	0.0019305	2	101	10797.5	10795.1	4.71627	0.0945963	-21569.5	-21581.7	tg_qn+whr_qn	tg_qn+whr_qn
uc002cgx.3	1	4721	18	0.0019305	0.0019305	1	100	10795.4	10795.1	0.690323	0.406054	-21574	-21581.7	tg_qn	tg_qn
uc002cgx.3	1	4721	18	0.0019305	0.0019305	2	11	10796.8	10795.1	3.46209	0.177099	-21568.3	-21581.7	lnfi+whr_qn	lnfi+whr_qn
uc002cgx.3	1	4721	18	0.0019305	0.0019305	1	10	10795.3	10795.1	0.471041	0.492509	-21573.7	-21581.7	lnfi	lnfi
uc002cgx.3	1	4721	18	0.0019305	0.0019305	1	1	10796.8	10795.1	3.33867	0.0676691	-21576.6	-21581.7	whr_qn	whr_qn
uc002cgw.1	28	4721	738	0.0803193	0.00286855	3	111	15307	15306.8	0.418984	0.936294	-30580.2	-30605.1	tg_qn+lnfi+whr_qn	lnfi+tg_qn+whr_qn
uc002cgw.1	28	4721	738	0.0803193	0.00286855	2	110	15307	15306.8	0.38117	0.826475	-30588.6	-30605.1	tg_qn+lnfi	lnfi+tg_qn
uc002cgw.1	28	4721	738	0.0803193	0.00286855	2	101	15306.9	15306.8	0.259094	0.878493	-30588.5	-30605.1	tg_qn+whr_qn	tg_qn+whr_qn
uc002cgw.1	28	4721	738	0.0803193	0.00286855	1	100	15306.9	15306.8	0.233937	0.62862	-30596.9	-30605.1	tg_qn	tg_qn
uc002cgw.1	28	4721	738	0.0803193	0.00286855	2	11	15306.9	15306.8	0.106714	0.948041	-30588.3	-30605.1	lnfi+whr_qn	lnfi+whr_qn
uc002cgw.1	28	4721	738	0.0803193	0.00286855	1	10	15306.8	15306.8	0.0434729	0.834837	-30596.7	-30605.1	lnfi	lnfi
uc002cgw.1	28	4721	738	0.0803193	0.00286855	1	1	15306.8	15306.8	0.0492922	0.824299	-30596.7	-30605.1	whr_qn	whr_qn
uc002cgy.2	12	4721	197	0.0212131	0.00176775	3	111	15919.9	15919.1	1.51145	0.679629	-31806	-31829.8	tg_qn+lnfi+whr_qn	lnfi+tg_qn+whr_qn
uc002cgy.2	12	4721	197	0.0212131	0.00176775	2	110	15919.8	15919.1	1.39722	0.497276	-31814.3	-31829.8	tg_qn+lnfi	lnfi+tg_qn
uc002cgy.2	12	4721	197	0.0212131	0.00176775	2	101	15919.2	15919.1	0.0510033	0.974821	-31813	-31829.8	tg_qn+whr_qn	tg_qn+whr_qn
uc002cgy.2	12	4721	197	0.0212131	0.00176775	1	100	15919.2	15919.1	0.013168	0.908642	-31821.4	-31829.8	tg_qn	tg_qn
uc002cgy.2	12	4721	197	0.0212131	0.00176775	2	11	15919.8	15919.1	1.3527	0.508468	-31814.3	-31829.8	lnfi+whr_qn	lnfi+whr_qn
uc002cgy.2	12	4721	197	0.0212131	0.00176775	1	10	15919.7	15919.1	1.20442	0.272441	-31822.6	-31829.8	lnfi	lnfi
uc002cgy.2	12	4721	197	0.0212131	0.00176775	1	1	15919.2	15919.1	0.0377394	0.845967	-31821.4	-31829.8	whr_qn	whr_qn
uc002cgz.2	11	4721	195	0.0209872	0.00190792	3	111	15577.9	15577.1	1.62574	0.653567	-31122.1	-31145.8	tg_qn+lnfi+whr_qn	lnfi+tg_qn+whr_qn
uc002cgz.2	11	4721	195	0.0209872	0.00190792	2	110	15577.9	15577.1	1.47152	0.479141	-31130.4	-31145.8	tg_qn+lnfi	lnfi+tg_qn
uc002cgz.2	11	4721	195	0.0209872	0.00190792	2	101	15577.2	15577.1	0.0858592	0.957979	-31129	-31145.8	tg_qn+whr_qn	tg_qn+whr_qn
uc002cgz.2	11	4721	195	0.0209872	0.00190792	1	100	15577.2	15577.1	0.0297795	0.862991	-31137.4	-31145.8	tg_qn	tg_qn
uc002cgz.2	11	4721	195	0.0209872	0.00190792	2	11	15577.9	15577.1	1.55165	0.460324	-31130.4	-31145.8	lnfi+whr_qn	lnfi+whr_qn
uc002cgz.2	11	4721	195	0.0209872	0.00190792	1	10	15577.8	15577.1	1.37009	0.241796	-31138.7	-31145.8	lnfi	lnfi
uc002cgz.2	11	4721	195	0.0209872	0.00190792	1	1	15577.2	15577.1	0.0447159	0.832527	-31137.4	-31145.8	whr_qn	whr_qn
uc002cha.2	11	4721	195	0.0209872	0.00190792	3	111	15577.9	15577.1	1.62574	0.653567	-31122.1	-31145.8	tg_qn+lnfi+whr_qn	lnfi+tg_qn+whr_qn
uc002cha.2	11	4721	195	0.0209872	0.00190792	2	110	15577.9	15577.1	1.47152	0.479141	-31130.4	-31145.8	tg_qn+lnfi	lnfi+tg_qn
uc002cha.2	11	4721	195	0.0209872	0.00190792	2	101	15577.2	15577.1	0.0858592	0.957979	-31129	-31145.8	tg_qn+whr_qn	tg_qn+whr_qn
uc002cha.2	11	4721	195	0.0209872	0.00190792	1	100	15577.2	15577.1	0.0297795	0.862991	-31137.4	-31145.8	tg_qn	tg_qn
uc002cha.2	11	4721	195	0.0209872	0.00190792	2	11	15577.9	15577.1	1.55165	0.460324	-31130.4	-31145.8	lnfi+whr_qn	lnfi+whr_qn
uc002cha.2	11	4721	195	0.0209872	0.00190792	1	10	15577.8	15577.1	1.37009	0.241796	-31138.7	-31145.8	lnfi	lnfi
uc002cha.2	11	4721	195	0.0209872	0.00190792	1	1	15577.2	15577.1	0.0447159	0.832527	-31137.4	-31145.8	whr_qn	whr_qn
uc002che.1	22	4721	561	0.0617377	0.00280626	3	111	16212.7	16210.4	4.66728	0.197846	-32391.6	-32412.3	tg_qn+lnfi+whr_qn	lnfi+tg_qn+whr_qn
uc002che.1	22	4721	561	0.0617377	0.00280626	2	110	16211.8	16210.4	2.80961	0.245415	-32398.2	-32412.3	tg_qn+lnfi	lnfi+tg_qn
uc002che.1	22	4721	561	0.0617377	0.00280626	2	101	16211.7	16210.4	2.68212	0.261568	-32398.1	-32412.3	tg_qn+whr_qn	tg_qn+whr_qn
uc002che.1	22	4721	561	0.0617377	0.00280626	1	100	16211	16210.4	1.27345	0.259121	-32405.1	-32412.3	tg_qn	tg_qn
uc002che.1	22	4721	561	0.0617377	0.00280626	2	11	16211.8	16210.4	2.90538	0.23394	-32398.3	-32412.3	lnfi+whr_qn	lnfi+whr_qn
uc002che.1	22	4721	561	0.0617377	0.00280626	1	10	16210.7	16210.4	0.560342	0.454123	-32404.4	-32412.3	lnfi	lnfi
uc002che.1	22	4721	561	0.0617377	0.00280626	1	1	16211.3	16210.4	1.86828	0.171672	-32405.7	-32412.3	whr_qn	whr_qn
uc002chb.2	47	4721	1640	0.183339	0.00390083	3	111	16601.4	16600.8	1.26221	0.738127	-33169	-33193.1	tg_qn+lnfi+whr_qn	lnfi+tg_qn+whr_qn
uc002chb.2	47	4721	1640	0.183339	0.00390083	2	110	16601.2	16600.8	0.820045	0.663635	-33177	-33193.1	tg_qn+lnfi	lnfi+tg_qn
uc002chb.2	47	4721	1640	0.183339	0.00390083	2	101	16601	16600.8	0.383096	0.82568	-33176.6	-33193.1	tg_qn+whr_qn	tg_qn+whr_qn
uc002chb.2	47	4721	1640	0.183339	0.00390083	1	100	16600.8	16600.8	0.0822681	0.774247	-33184.8	-33193.1	tg_qn	tg_qn
uc002chb.2	47	4721	1640	0.183339	0.00390083	2	11	16601.4	16600.8	1.25263	0.534557	-33177.5	-33193.1	lnfi+whr_qn	lnfi+whr_qn
uc002chb.2	47	4721	1640	0.183339	0.00390083	1	10	16601.2	16600.8	0.807269	0.368929	-33185.5	-33193.1	lnfi	lnfi
uc002chb.2	47	4721	1640	0.183339	0.00390083	1	1	16600.9	16600.8	0.243587	0.621627	-33184.9	-33193.1	whr_qn	whr_qn
uc002chc.2	47	4721	1640	0.183339	0.00390083	3	111	16601.4	16600.8	1.26221	0.738127	-33169	-33193.1	tg_qn+lnfi+whr_qn	lnfi+tg_qn+whr_qn
uc002chc.2	47	4721	1640	0.183339	0.00390083	2	110	16601.2	16600.8	0.820045	0.663635	-33177	-33193.1	tg_qn+lnfi	lnfi+tg_qn
uc002chc.2	47	4721	1640	0.183339	0.00390083	2	101	16601	16600.8	0.383096	0.82568	-33176.6	-33193.1	tg_qn+whr_qn	tg_qn+whr_qn
uc002chc.2	47	4721	1640	0.183339	0.00390083	1	100	16600.8	16600.8	0.0822681	0.774247	-33184.8	-33193.1	tg_qn	tg_qn
uc002chc.2	47	4721	1640	0.183339	0.00390083	2	11	16601.4	16600.8	1.25263	0.534557	-33177.5	-33193.1	lnfi+whr_qn	lnfi+whr_qn
uc002chc.2	47	4721	1640	0.183339	0.00390083	1	10	16601.2	16600.8	0.807269	0.368929	-33185.5	-33193.1	lnfi	lnfi
uc002chc.2	47	4721	1640	0.183339	0.00390083	1	1	16600.9	16600.8	0.243587	0.621627	-33184.9	-33193.1	whr_qn	whr_qn
uc010bqv.2	47	4721	1640	0.183339	0.00390083	3	111	16601.4	16600.8	1.26221	0.738127	-33169	-33193.1	tg_qn+lnfi+whr_qn	lnfi+tg_qn+whr_qn
uc010bqv.2	47	4721	1640	0.183339	0.00390083	2	110	16601.2	16600.8	0.820045	0.663635	-33177	-33193.1	tg_qn+lnfi	lnfi+tg_qn
uc010bqv.2	47	4721	1640	0.183339	0.00390083	2	101	16601	16600.8	0.383096	0.82568	-33176.6	-33193.1	tg_qn+whr_qn	tg_qn+whr_qn
uc010bqv.2	47	4721	1640	0.183339	0.00390083	1	100	16600.8	16600.8	0.0822681	0.774247	-33184.8	-33193.1	tg_qn	tg_qn
uc010bqv.2	47	4721	1640	0.183339	0.00390083	2	11	16601.4	16600.8	1.25263	0.534557	-33177.5	-33193.1	lnfi+whr_qn	lnfi+whr_qn
uc010bqv.2	47	4721	1640	0.183339	0.00390083	1	10	16601.2	16600.8	0.807269	0.368929	-33185.5	-33193.1	lnfi	lnfi
uc010bqv.2	47	4721	1640	0.183339	0.00390083	1	1	16600.9	16600.8	0.243587	0.621627	-33184.9	-33193.1	whr_qn	whr_qn
uc002chd.2	47	4721	1640	0.183339	0.00390083	3	111	16601.4	16600.8	1.26221	0.738127	-33169	-33193.1	tg_qn+lnfi+whr_qn	lnfi+tg_qn+whr_qn
uc002chd.2	47	4721	1640	0.183339	0.00390083	2	110	16601.2	16600.8	0.820045	0.663635	-33177	-33193.1	tg_qn+lnfi	lnfi+tg_qn
uc002chd.2	47	4721	1640	0.183339	0.00390083	2	101	16601	16600.8	0.383096	0.82568	-33176.6	-33193.1	tg_qn+whr_qn	tg_qn+whr_qn
uc002chd.2	47	4721	1640	0.183339	0.00390083	1	100	16600.8	16600.8	0.0822681	0.774247	-33184.8	-33193.1	tg_qn	tg_qn
uc002chd.2	47	4721	1640	0.183339	0.00390083	2	11	16601.4	16600.8	1.25263	0.534557	-33177.5	-33193.1	lnfi+whr_qn	lnfi+whr_qn
uc002chd.2	47	4721	1640	0.183339	0.00390083	1	10	16601.2	16600.8	0.807269	0.368929	-33185.5	-33193.1	lnfi	lnfi
uc002chd.2	47	4721	1640	0.183339	0.00390083	1	1	16600.9	16600.8	0.243587	0.621627	-33184.9	-33193.1	whr_qn	whr_qn
uc002chf.2	303	4721	17830	2.03163	0.00670505	3	111	14559.8	14558	3.64056	0.302985	-29085.8	-29107.5	tg_qn+lnfi+whr_qn	lnfi+tg_qn+whr_qn
uc002chf.2	303	4721	17830	2.03163	0.00670505	2	110	14559.7	14558	3.49009	0.174637	-29094.1	-29107.5	tg_qn+lnfi	lnfi+tg_qn
uc002chf.2	303	4721	17830	2.03163	0.00670505	2	101	14559.6	14558	3.16702	0.205253	-29093.7	-29107.5	tg_qn+whr_qn	tg_qn+whr_qn
uc002chf.2	303	4721	17830	2.03163	0.00670505	1	100	14559.4	14558	2.93841	0.086496	-29102	-29107.5	tg_qn	tg_qn
uc002chf.2	303	4721	17830	2.03163	0.00670505	2	11	14559	14558	2.01022	0.366004	-29092.6	-29107.5	lnfi+whr_qn	lnfi+whr_qn
uc002chf.2	303	4721	17830	2.03163	0.00670505	1	10	14558.8	14558	1.72129	0.189527	-29100.8	-29107.5	lnfi	lnfi
uc002chf.2	303	4721	17830	2.03163	0.00670505	1	1	14558.3	14558	0.589027	0.442796	-29099.6	-29107.5	whr_qn	whr_qn
uc010uuf.1	163	4721	11663	1.33712	0.00820317	3	111	12138.5	12136.5	4.04689	0.256445	-24243.2	-24264.5	tg_qn+lnfi+whr_qn	lnfi+tg_qn+whr_qn
uc010uuf.1	163	4721	11663	1.33712	0.00820317	2	110	12138.4	12136.5	3.91959	0.140887	-24251.5	-24264.5	tg_qn+lnfi	lnfi+tg_qn
uc010uuf.1	163	4721	11663	1.33712	0.00820317	2	101	12138.3	12136.5	3.68168	0.158684	-24251.3	-24264.5	tg_qn+whr_qn	tg_qn+whr_qn
uc010uuf.1	163	4721	11663	1.33712	0.00820317	1	100	12138.2	12136.5	3.49249	0.0616479	-24259.5	-24264.5	tg_qn	tg_qn
uc010uuf.1	163	4721	11663	1.33712	0.00820317	2	11	12137.4	12136.5	1.92579	0.381786	-24249.5	-24264.5	lnfi+whr_qn	lnfi+whr_qn
uc010uuf.1	163	4721	11663	1.33712	0.00820317	1	10	12137.3	12136.5	1.64901	0.199094	-24257.7	-24264.5	lnfi	lnfi
uc010uuf.1	163	4721	11663	1.33712	0.00820317	1	1	12136.8	12136.5	0.563766	0.452747	-24256.6	-24264.5	whr_qn	whr_qn
uc010uug.1	148	4721	11504	1.31968	0.00891675	3	111	11689.4	11687.3	4.09252	0.251646	-23344.9	-23366.2	tg_qn+lnfi+whr_qn	lnfi+tg_qn+whr_qn
uc010uug.1	148	4721	11504	1.31968	0.00891675	2	110	11689.3	11687.3	3.95449	0.13845	-23353.2	-23366.2	tg_qn+lnfi	lnfi+tg_qn
uc010uug.1	148	4721	11504	1.31968	0.00891675	2	101	11689.2	11687.3	3.71478	0.156079	-23353	-23366.2	tg_qn+whr_qn	tg_qn+whr_qn
uc010uug.1	148	4721	11504	1.31968	0.00891675	1	100	11689.1	11687.3	3.5112	0.0609553	-23361.2	-23366.2	tg_qn	tg_qn
uc010uug.1	148	4721	11504	1.31968	0.00891675	2	11	11688.3	11687.3	1.97538	0.372436	-23351.2	-23366.2	lnfi+whr_qn	lnfi+whr_qn
uc010uug.1	148	4721	11504	1.31968	0.00891675	1	10	11688.2	11687.3	1.68275	0.19456	-23359.4	-23366.2	lnfi	lnfi
uc010uug.1	148	4721	11504	1.31968	0.00891675	1	1	11687.6	11687.3	0.589545	0.442595	-23358.3	-23366.2	whr_qn	whr_qn
uc010uuh.1	3	4721	99	0.0114774	0.00382582	3	111	11999	11998.5	0.9155	0.821686	-23964.1	-23988.6	tg_qn+lnfi+whr_qn	lnfi+tg_qn+whr_qn
uc010uuh.1	3	4721	99	0.0114774	0.00382582	2	110	11998.9	11998.5	0.713505	0.699946	-23972.4	-23988.6	tg_qn+lnfi	lnfi+tg_qn
uc010uuh.1	3	4721	99	0.0114774	0.00382582	2	101	11998.7	11998.5	0.311478	0.855783	-23972	-23988.6	tg_qn+whr_qn	tg_qn+whr_qn
uc010uuh.1	3	4721	99	0.0114774	0.00382582	1	100	11998.5	11998.5	0.000355106	0.984965	-23980.1	-23988.6	tg_qn	tg_qn
uc010uuh.1	3	4721	99	0.0114774	0.00382582	2	11	11998.9	11998.5	0.763315	0.682729	-23972.4	-23988.6	lnfi+whr_qn	lnfi+whr_qn
uc010uuh.1	3	4721	99	0.0114774	0.00382582	1	10	11998.8	11998.5	0.598491	0.439154	-23980.7	-23988.6	lnfi	lnfi
uc010uuh.1	3	4721	99	0.0114774	0.00382582	1	1	11998.7	11998.5	0.295077	0.586985	-23980.4	-23988.6	whr_qn	whr_qn
uc002chg.2	46	4721	2758	0.325847	0.00708362	3	111	13188.4	13186.6	3.61049	0.306713	-26342.9	-26364.6	tg_qn+lnfi+whr_qn	lnfi+tg_qn+whr_qn
uc002chg.2	46	4721	2758	0.325847	0.00708362	2	110	13188.3	13186.6	3.53791	0.170511	-26351.3	-26364.6	tg_qn+lnfi	lnfi+tg_qn
uc002chg.2	46	4721	2758	0.325847	0.00708362	2	101	13187.4	13186.6	1.67691	0.432377	-26349.4	-26364.6	tg_qn+whr_qn	tg_qn+whr_qn
uc002chg.2	46	4721	2758	0.325847	0.00708362	1	100	13187.3	13186.6	1.48881	0.222401	-26357.7	-26364.6	tg_qn	tg_qn
uc002chg.2	46	4721	2758	0.325847	0.00708362	2	11	13188.2	13186.6	3.25202	0.196713	-26351	-26364.6	lnfi+whr_qn	lnfi+whr_qn
uc002chg.2	46	4721	2758	0.325847	0.00708362	1	10	13188.1	13186.6	3.14339	0.0762351	-26359.3	-26364.6	lnfi	lnfi
uc002chg.2	46	4721	2758	0.325847	0.00708362	1	1	13186.8	13186.6	0.399196	0.527505	-26356.6	-26364.6	whr_qn	whr_qn
uc002chh.1	98	4721	3548	0.414714	0.00423178	3	111	15582.6	15581.8	1.65789	0.646335	-31131.3	-31155.1	tg_qn+lnfi+whr_qn	lnfi+tg_qn+whr_qn
uc002chh.1	98	4721	3548	0.414714	0.00423178	2	110	15582.6	15581.8	1.61442	0.446101	-31139.7	-31155.1	tg_qn+lnfi	lnfi+tg_qn
uc002chh.1	98	4721	3548	0.414714	0.00423178	2	101	15582	15581.8	0.586689	0.745765	-31138.7	-31155.1	tg_qn+whr_qn	tg_qn+whr_qn
uc002chh.1	98	4721	3548	0.414714	0.00423178	1	100	15582	15581.8	0.493677	0.482292	-31147.1	-31155.1	tg_qn	tg_qn
uc002chh.1	98	4721	3548	0.414714	0.00423178	2	11	15582.5	15581.8	1.56513	0.457232	-31139.7	-31155.1	lnfi+whr_qn	lnfi+whr_qn
uc002chh.1	98	4721	3548	0.414714	0.00423178	1	10	15582.5	15581.8	1.51481	0.218407	-31148.1	-31155.1	lnfi	lnfi
uc002chh.1	98	4721	3548	0.414714	0.00423178	1	1	15581.8	15581.8	0.163045	0.686369	-31146.8	-31155.1	whr_qn	whr_qn
uc002chi.2	122	4721	3962	0.45965	0.00376762	3	111	16485.3	16484.6	1.59151	0.661316	-32936.9	-32960.6	tg_qn+lnfi+whr_qn	lnfi+tg_qn+whr_qn
uc002chi.2	122	4721	3962	0.45965	0.00376762	2	110	16485.3	16484.6	1.50191	0.471915	-32945.2	-32960.6	tg_qn+lnfi	lnfi+tg_qn
uc002chi.2	122	4721	3962	0.45965	0.00376762	2	101	16484.7	16484.6	0.372592	0.830028	-32944.1	-32960.6	tg_qn+whr_qn	tg_qn+whr_qn
uc002chi.2	122	4721	3962	0.45965	0.00376762	1	100	16484.7	16484.6	0.329198	0.566132	-32952.5	-32960.6	tg_qn	tg_qn
uc002chi.2	122	4721	3962	0.45965	0.00376762	2	11	16485.3	16484.6	1.53506	0.464159	-32945.3	-32960.6	lnfi+whr_qn	lnfi+whr_qn
uc002chi.2	122	4721	3962	0.45965	0.00376762	1	10	16485.3	16484.6	1.45222	0.228172	-32953.6	-32960.6	lnfi	lnfi
uc002chi.2	122	4721	3962	0.45965	0.00376762	1	1	16484.6	16484.6	0.0354231	0.850712	-32952.2	-32960.6	whr_qn	whr_qn
uc002chj.2	6	4721	136	0.0145434	0.0024239	3	111	14340.1	14339.7	0.790394	0.851763	-28646.4	-28671	tg_qn+lnfi+whr_qn	lnfi+tg_qn+whr_qn
uc002chj.2	6	4721	136	0.0145434	0.0024239	2	110	14339.8	14339.7	0.0575044	0.971657	-28654.1	-28671	tg_qn+lnfi	lnfi+tg_qn
uc002chj.2	6	4721	136	0.0145434	0.0024239	2	101	14340.1	14339.7	0.767574	0.681276	-28654.9	-28671	tg_qn+whr_qn	tg_qn+whr_qn
uc002chj.2	6	4721	136	0.0145434	0.0024239	1	100	14339.8	14339.7	0.0512461	0.820909	-28662.6	-28671	tg_qn	tg_qn
uc002chj.2	6	4721	136	0.0145434	0.0024239	2	11	14340.1	14339.7	0.69954	0.70485	-28654.8	-28671	lnfi+whr_qn	lnfi+whr_qn
uc002chj.2	6	4721	136	0.0145434	0.0024239	1	10	14339.7	14339.7	0.0147672	0.903279	-28662.6	-28671	lnfi	lnfi
uc002chj.2	6	4721	136	0.0145434	0.0024239	1	1	14340.1	14339.7	0.633408	0.426108	-28663.2	-28671	whr_qn	whr_qn
uc002chk.2	14	4721	998	0.111849	0.00798921	3	111	10724.8	10724.3	0.928342	0.818583	-21415.8	-21440.2	tg_qn+lnfi+whr_qn	lnfi+tg_qn+whr_qn
uc002chk.2	14	4721	998	0.111849	0.00798921	2	110	10724.7	10724.3	0.808286	0.667549	-21424.1	-21440.2	tg_qn+lnfi	lnfi+tg_qn
uc002chk.2	14	4721	998	0.111849	0.00798921	2	101	10724.7	10724.3	0.739977	0.690742	-21424	-21440.2	tg_qn+whr_qn	tg_qn+whr_qn
uc002chk.2	14	4721	998	0.111849	0.00798921	1	100	10724.6	10724.3	0.579651	0.446449	-21432.3	-21440.2	tg_qn	tg_qn
uc002chk.2	14	4721	998	0.111849	0.00798921	2	11	10724.4	10724.3	0.10385	0.9494	-21423.4	-21440.2	lnfi+whr_qn	lnfi+whr_qn
uc002chk.2	14	4721	998	0.111849	0.00798921	1	10	10724.4	10724.3	0.0380435	0.845356	-21431.8	-21440.2	lnfi	lnfi
uc002chk.2	14	4721	998	0.111849	0.00798921	1	1	10724.4	10724.3	0.0773072	0.78098	-21431.8	-21440.2	whr_qn	whr_qn
uc002chl.2	4	4721	14	0.0015508	0.0003877	3	111	17931.9	17931	1.87573	0.598594	-35830.1	-35853.6	tg_qn+lnfi+whr_qn	lnfi+tg_qn+whr_qn
uc002chl.2	4	4721	14	0.0015508	0.0003877	2	110	17931.7	17931	1.45317	0.483558	-35838.1	-35853.6	tg_qn+lnfi	lnfi+tg_qn
uc002chl.2	4	4721	14	0.0015508	0.0003877	2	101	17931.8	17931	1.56963	0.456204	-35838.2	-35853.6	tg_qn+whr_qn	tg_qn+whr_qn
uc002chl.2	4	4721	14	0.0015508	0.0003877	1	100	17931.6	17931	1.23126	0.267162	-35846.3	-35853.6	tg_qn	tg_qn
uc002chl.2	4	4721	14	0.0015508	0.0003877	2	11	17931.3	17931	0.623743	0.732076	-35837.3	-35853.6	lnfi+whr_qn	lnfi+whr_qn
uc002chl.2	4	4721	14	0.0015508	0.0003877	1	10	17931	17931	0.000861447	0.976585	-35845.1	-35853.6	lnfi	lnfi
uc002chl.2	4	4721	14	0.0015508	0.0003877	1	1	17931.3	17931	0.591736	0.441749	-35845.7	-35853.6	whr_qn	whr_qn
uc002chm.2	19	4721	184	0.0202731	0.00106701	3	111	18451.3	18449.3	4.17229	0.243451	-36868.8	-36890.1	tg_qn+lnfi+whr_qn	lnfi+tg_qn+whr_qn
uc002chm.2	19	4721	184	0.0202731	0.00106701	2	110	18450.6	18449.3	2.64047	0.267073	-36875.8	-36890.1	tg_qn+lnfi	lnfi+tg_qn
uc002chm.2	19	4721	184	0.0202731	0.00106701	2	101	18450.3	18449.3	2.08779	0.352081	-36875.2	-36890.1	tg_qn+whr_qn	tg_qn+whr_qn
uc002chm.2	19	4721	184	0.0202731	0.00106701	1	100	18449.3	18449.3	0.0120385	0.912631	-36881.6	-36890.1	tg_qn	tg_qn
uc002chm.2	19	4721	184	0.0202731	0.00106701	2	11	18451.1	18449.3	3.65311	0.160967	-36876.8	-36890.1	lnfi+whr_qn	lnfi+whr_qn
uc002chm.2	19	4721	184	0.0202731	0.00106701	1	10	18450.4	18449.3	2.30468	0.128985	-36883.9	-36890.1	lnfi	lnfi
uc002chm.2	19	4721	184	0.0202731	0.00106701	1	1	18450.3	18449.3	2.0226	0.154974	-36883.6	-36890.1	whr_qn	whr_qn
uc010uuj.1	1	4721	1	0.000106157	0.000106157	3	111	17610.4	17609.3	2.14394	0.543075	-35186.9	-35210.1	tg_qn+lnfi+whr_qn	lnfi+tg_qn+whr_qn
uc010uuj.1	1	4721	1	0.000106157	0.000106157	2	110	17610.4	17609.3	2.11149	0.347934	-35195.3	-35210.1	tg_qn+lnfi	lnfi+tg_qn
uc010uuj.1	1	4721	1	0.000106157	0.000106157	2	101	17610.1	17609.3	1.49844	0.472736	-35194.7	-35210.1	tg_qn+whr_qn	tg_qn+whr_qn
uc010uuj.1	1	4721	1	0.000106157	0.000106157	1	100	17610	17609.3	1.49319	0.221723	-35203.2	-35210.1	tg_qn	tg_qn
uc010uuj.1	1	4721	1	0.000106157	0.000106157	2	11	17609.4	17609.3	0.203872	0.903087	-35193.4	-35210.1	lnfi+whr_qn	lnfi+whr_qn
uc010uuj.1	1	4721	1	0.000106157	0.000106157	1	10	17609.3	17609.3	0.0812926	0.775553	-35201.8	-35210.1	lnfi	lnfi
uc010uuj.1	1	4721	1	0.000106157	0.000106157	1	1	17609.3	17609.3	0.0846117	0.771142	-35201.8	-35210.1	whr_qn	whr_qn
uc010bqw.2	41	4721	356	0.0394968	0.000963338	3	111	19909	19908.3	1.4304	0.698426	-39784.1	-39808.1	tg_qn+lnfi+whr_qn	lnfi+tg_qn+whr_qn
uc010bqw.2	41	4721	356	0.0394968	0.000963338	2	110	19908.3	19908.3	0.140091	0.932352	-39791.3	-39808.1	tg_qn+lnfi	lnfi+tg_qn
uc010bqw.2	41	4721	356	0.0394968	0.000963338	2	101	19909	19908.3	1.41516	0.492835	-39792.6	-39808.1	tg_qn+whr_qn	tg_qn+whr_qn
uc010bqw.2	41	4721	356	0.0394968	0.000963338	1	100	19908.3	19908.3	0.097179	0.755242	-39799.7	-39808.1	tg_qn	tg_qn
uc010bqw.2	41	4721	356	0.0394968	0.000963338	2	11	19908.9	19908.3	1.20122	0.548478	-39792.3	-39808.1	lnfi+whr_qn	lnfi+whr_qn
uc010bqw.2	41	4721	356	0.0394968	0.000963338	1	10	19908.3	19908.3	0.0153067	0.901537	-39799.6	-39808.1	lnfi	lnfi
uc010bqw.2	41	4721	356	0.0394968	0.000963338	1	1	19908.8	19908.3	1.16498	0.280435	-39800.8	-39808.1	whr_qn	whr_qn
uc002chn.2	37	4721	342	0.037946	0.00102557	3	111	19502.9	19502.1	1.65231	0.647587	-38971.9	-38995.7	tg_qn+lnfi+whr_qn	lnfi+tg_qn+whr_qn
uc002chn.2	37	4721	342	0.037946	0.00102557	2	110	19502.1	19502.1	0.0520609	0.974305	-38978.8	-38995.7	tg_qn+lnfi	lnfi+tg_qn
uc002chn.2	37	4721	342	0.037946	0.00102557	2	101	19502.9	19502.1	1.63305	0.441966	-38980.4	-38995.7	tg_qn+whr_qn	tg_qn+whr_qn
uc002chn.2	37	4721	342	0.037946	0.00102557	1	100	19502.1	19502.1	0.028405	0.86616	-38987.2	-38995.7	tg_qn	tg_qn
uc002chn.2	37	4721	342	0.037946	0.00102557	2	11	19502.8	19502.1	1.54934	0.460855	-38980.3	-38995.7	lnfi+whr_qn	lnfi+whr_qn
uc002chn.2	37	4721	342	0.037946	0.00102557	1	10	19502.1	19502.1	0.0143375	0.90469	-38987.2	-38995.7	lnfi	lnfi
uc002chn.2	37	4721	342	0.037946	0.00102557	1	1	19502.8	19502.1	1.5034	0.22015	-38988.7	-38995.7	whr_qn	whr_qn
uc002cho.2	37	4721	342	0.037946	0.00102557	3	111	19502.9	19502.1	1.65231	0.647587	-38971.9	-38995.7	tg_qn+lnfi+whr_qn	lnfi+tg_qn+whr_qn
uc002cho.2	37	4721	342	0.037946	0.00102557	2	110	19502.1	19502.1	0.0520609	0.974305	-38978.8	-38995.7	tg_qn+lnfi	lnfi+tg_qn
uc002cho.2	37	4721	342	0.037946	0.00102557	2	101	19502.9	19502.1	1.63305	0.441966	-38980.4	-38995.7	tg_qn+whr_qn	tg_qn+whr_qn
uc002cho.2	37	4721	342	0.037946	0.00102557	1	100	19502.1	19502.1	0.028405	0.86616	-38987.2	-38995.7	tg_qn	tg_qn
uc002cho.2	37	4721	342	0.037946	0.00102557	2	11	19502.8	19502.1	1.54934	0.460855	-38980.3	-38995.7	lnfi+whr_qn	lnfi+whr_qn
uc002cho.2	37	4721	342	0.037946	0.00102557	1	10	19502.1	19502.1	0.0143375	0.90469	-38987.2	-38995.7	lnfi	lnfi
uc002cho.2	37	4721	342	0.037946	0.00102557	1	1	19502.8	19502.1	1.5034	0.22015	-38988.7	-38995.7	whr_qn	whr_qn
uc010uui.1	33	4721	292	0.0321551	0.000974397	3	111	19175.5	19174.7	1.63712	0.651003	-38317.2	-38341	tg_qn+lnfi+whr_qn	lnfi+tg_qn+whr_qn
uc010uui.1	33	4721	292	0.0321551	0.000974397	2	110	19174.9	19174.7	0.354516	0.837564	-38324.4	-38341	tg_qn+lnfi	lnfi+tg_qn
uc010uui.1	33	4721	292	0.0321551	0.000974397	2	101	19175.5	19174.7	1.55053	0.460582	-38325.6	-38341	tg_qn+whr_qn	tg_qn+whr_qn
uc010uui.1	33	4721	292	0.0321551	0.000974397	1	100	19174.9	19174.7	0.325308	0.568435	-38332.8	-38341	tg_qn	tg_qn
uc010uui.1	33	4721	292	0.0321551	0.000974397	2	11	19175.3	19174.7	1.25349	0.534329	-38325.3	-38341	lnfi+whr_qn	lnfi+whr_qn
uc010uui.1	33	4721	292	0.0321551	0.000974397	1	10	19174.8	19174.7	0.112142	0.737718	-38332.6	-38341	lnfi	lnfi
uc010uui.1	33	4721	292	0.0321551	0.000974397	1	1	19175.2	19174.7	0.983262	0.321395	-38333.5	-38341	whr_qn	whr_qn
uc002chp.2	4	4721	50	0.00560409	0.00140102	3	111	14947.3	14944.3	6.01428	0.110918	-29860.8	-29880.1	tg_qn+lnfi+whr_qn	lnfi+tg_qn+whr_qn
uc002chp.2	4	4721	50	0.00560409	0.00140102	2	110	14946.8	14944.3	4.99205	0.0824118	-29868.2	-29880.1	tg_qn+lnfi	lnfi+tg_qn
uc002chp.2	4	4721	50	0.00560409	0.00140102	2	101	14945.1	14944.3	1.70449	0.426457	-29864.9	-29880.1	tg_qn+whr_qn	tg_qn+whr_qn
uc002chp.2	4	4721	50	0.00560409	0.00140102	1	100	14944.3	14944.3	0.0192561	0.889635	-29871.7	-29880.1	tg_qn	tg_qn
uc002chp.2	4	4721	50	0.00560409	0.00140102	2	11	14947	14944.3	5.37329	0.0681091	-29868.6	-29880.1	lnfi+whr_qn	lnfi+whr_qn
uc002chp.2	4	4721	50	0.00560409	0.00140102	1	10	14946.6	14944.3	4.52301	0.0334419	-29876.2	-29880.1	lnfi	lnfi
uc002chp.2	4	4721	50	0.00560409	0.00140102	1	1	14945.1	14944.3	1.69621	0.192785	-29873.4	-29880.1	whr_qn	whr_qn
uc002chq.2	102	4721	1803	0.197765	0.00193888	3	111	17572.6	17570.3	4.607	0.202943	-35111.4	-35132.2	tg_qn+lnfi+whr_qn	lnfi+tg_qn+whr_qn
uc002chq.2	102	4721	1803	0.197765	0.00193888	2	110	17571.5	17570.3	2.40781	0.300021	-35117.6	-35132.2	tg_qn+lnfi	lnfi+tg_qn
uc002chq.2	102	4721	1803	0.197765	0.00193888	2	101	17572.4	17570.3	4.2287	0.120712	-35119.5	-35132.2	tg_qn+whr_qn	tg_qn+whr_qn
uc002chq.2	102	4721	1803	0.197765	0.00193888	1	100	17571.2	17570.3	1.74109	0.187001	-35125.4	-35132.2	tg_qn	tg_qn
uc002chq.2	102	4721	1803	0.197765	0.00193888	2	11	17571.2	17570.3	1.75435	0.415956	-35117	-35132.2	lnfi+whr_qn	lnfi+whr_qn
uc002chq.2	102	4721	1803	0.197765	0.00193888	1	10	17570.4	17570.3	0.0868398	0.768234	-35123.8	-35132.2	lnfi	lnfi
uc002chq.2	102	4721	1803	0.197765	0.00193888	1	1	17571.2	17570.3	1.74164	0.186931	-35125.4	-35132.2	whr_qn	whr_qn
uc002.2	102	4721	1803	0.197765	0.00193888	3	111	17572.6	17570.3	4.607	0.202943	-35111.4	-35132.2	tg_qn+lnfi+whr_qn	lnfi+tg_qn+whr_qn
uc002.2	102	4721	1803	0.197765	0.00193888	2	110	17571.5	17570.3	2.40781	0.300021	-35117.6	-35132.2	tg_qn+lnfi	lnfi+tg_qn
uc002.2	102	4721	1803	0.197765	0.00193888	2	101	17572.4	17570.3	4.2287	0.120712	-35119.5	-35132.2	tg_qn+whr_qn	tg_qn+whr_qn
uc002.2	102	4721	1803	0.197765	0.00193888	1	100	17571.2	17570.3	1.74109	0.187001	-35125.4	-35132.2	tg_qn	tg_qn
uc002.2	102	4721	1803	0.197765	0.00193888	2	11	17571.2	17570.3	1.75435	0.415956	-35117	-35132.2	lnfi+whr_qn	lnfi+whr_qn
uc002.2	102	4721	1803	0.197765	0.00193888	1	10	17570.4	17570.3	0.0868398	0.768234	-35123.8	-35132.2	lnfi	lnfi
uc002.2	102	4721	1803	0.197765	0.00193888	1	1	17571.2	17570.3	1.74164	0.186931	-35125.4	-35132.2	whr_qn	whr_qn
uc002chs.1	13	4721	256	0.0280738	0.00215952	3	111	16507.8	16507.7	0.199895	0.977606	-32981.7	-33006.9	tg_qn+lnfi+whr_qn	lnfi+tg_qn+whr_qn
uc002chs.1	13	4721	256	0.0280738	0.00215952	2	110	16507.7	16507.7	0.163604	0.921454	-32990.1	-33006.9	tg_qn+lnfi	lnfi+tg_qn
uc002chs.1	13	4721	256	0.0280738	0.00215952	2	101	16507.7	16507.7	0.112276	0.945409	-32990.1	-33006.9	tg_qn+whr_qn	tg_qn+whr_qn
uc002chs.1	13	4721	256	0.0280738	0.00215952	1	100	16507.7	16507.7	0.0617563	0.803741	-32998.5	-33006.9	tg_qn	tg_qn
uc002chs.1	13	4721	256	0.0280738	0.00215952	2	11	16507.7	16507.7	0.0754303	0.962987	-32990	-33006.9	lnfi+whr_qn	lnfi+whr_qn
uc002chs.1	13	4721	256	0.0280738	0.00215952	1	10	16507.7	16507.7	0.0500566	0.822965	-32998.5	-33006.9	lnfi	lnfi
uc002chs.1	13	4721	256	0.0280738	0.00215952	1	1	16507.7	16507.7	0.0353523	0.850859	-32998.5	-33006.9	whr_qn	whr_qn
uc002cht.1	9	4721	97	0.0106139	0.00117933	3	111	17020.7	17017.7	6.01479	0.110893	-34007.5	-34026.8	tg_qn+lnfi+whr_qn	lnfi+tg_qn+whr_qn
uc002cht.1	9	4721	97	0.0106139	0.00117933	2	110	17020.4	17017.7	5.52613	0.063098	-34015.5	-34026.8	tg_qn+lnfi	lnfi+tg_qn
uc002cht.1	9	4721	97	0.0106139	0.00117933	2	101	17019.8	17017.7	4.23442	0.120367	-34014.2	-34026.8	tg_qn+whr_qn	tg_qn+whr_qn
uc002cht.1	9	4721	97	0.0106139	0.00117933	1	100	17019.4	17017.7	3.45438	0.0630843	-34021.8	-34026.8	tg_qn	tg_qn
uc002cht.1	9	4721	97	0.0106139	0.00117933	2	11	17020	17017.7	4.77257	0.0919706	-34014.7	-34026.8	lnfi+whr_qn	lnfi+whr_qn
uc002cht.1	9	4721	97	0.0106139	0.00117933	1	10	17019.7	17017.7	4.07148	0.0436131	-34022.5	-34026.8	lnfi	lnfi
uc002cht.1	9	4721	97	0.0106139	0.00117933	1	1	17018.4	17017.7	1.43431	0.231062	-34019.8	-34026.8	whr_qn	whr_qn
uc002chv.1	3	4721	72	0.00788991	0.00262997	3	111	11175.6	11172.7	5.78294	0.122662	-22317.4	-22337	tg_qn+lnfi+whr_qn	lnfi+tg_qn+whr_qn
uc002chv.1	3	4721	72	0.00788991	0.00262997	2	110	11174.5	11172.7	3.65867	0.16052	-22323.7	-22337	tg_qn+lnfi	lnfi+tg_qn
uc002chv.1	3	4721	72	0.00788991	0.00262997	2	101	11175.6	11172.7	5.69954	0.0578575	-22325.7	-22337	tg_qn+whr_qn	tg_qn+whr_qn
uc002chv.1	3	4721	72	0.00788991	0.00262997	1	100	11174.5	11172.7	3.60572	0.0575811	-22332.1	-22337	tg_qn	tg_qn
uc002chv.1	3	4721	72	0.00788991	0.00262997	2	11	11173.7	11172.7	2.05339	0.358188	-22322.1	-22337	lnfi+whr_qn	lnfi+whr_qn
uc002chv.1	3	4721	72	0.00788991	0.00262997	1	10	11173	11172.7	0.523952	0.469161	-22329	-22337	lnfi	lnfi
uc002chv.1	3	4721	72	0.00788991	0.00262997	1	1	11173.3	11172.7	1.1898	0.27537	-22329.7	-22337	whr_qn	whr_qn
uc002chw.1	3	4721	72	0.00788991	0.00262997	3	111	11175.6	11172.7	5.78294	0.122662	-22317.4	-22337	tg_qn+lnfi+whr_qn	lnfi+tg_qn+whr_qn
uc002chw.1	3	4721	72	0.00788991	0.00262997	2	110	11174.5	11172.7	3.65867	0.16052	-22323.7	-22337	tg_qn+lnfi	lnfi+tg_qn
uc002chw.1	3	4721	72	0.00788991	0.00262997	2	101	11175.6	11172.7	5.69954	0.0578575	-22325.7	-22337	tg_qn+whr_qn	tg_qn+whr_qn
uc002chw.1	3	4721	72	0.00788991	0.00262997	1	100	11174.5	11172.7	3.60572	0.0575811	-22332.1	-22337	tg_qn	tg_qn
uc002chw.1	3	4721	72	0.00788991	0.00262997	2	11	11173.7	11172.7	2.05339	0.358188	-22322.1	-22337	lnfi+whr_qn	lnfi+whr_qn
uc002chw.1	3	4721	72	0.00788991	0.00262997	1	10	11173	11172.7	0.523952	0.469161	-22329	-22337	lnfi	lnfi
uc002chw.1	3	4721	72	0.00788991	0.00262997	1	1	11173.3	11172.7	1.1898	0.27537	-22329.7	-22337	whr_qn	whr_qn
uc002chz.1	3	4721	72	0.00788991	0.00262997	3	111	11175.6	11172.7	5.78294	0.122662	-22317.4	-22337	tg_qn+lnfi+whr_qn	lnfi+tg_qn+whr_qn
uc002chz.1	3	4721	72	0.00788991	0.00262997	2	110	11174.5	11172.7	3.65867	0.16052	-22323.7	-22337	tg_qn+lnfi	lnfi+tg_qn
uc002chz.1	3	4721	72	0.00788991	0.00262997	2	101	11175.6	11172.7	5.69954	0.0578575	-22325.7	-22337	tg_qn+whr_qn	tg_qn+whr_qn
uc002chz.1	3	4721	72	0.00788991	0.00262997	1	100	11174.5	11172.7	3.60572	0.0575811	-22332.1	-22337	tg_qn	tg_qn
uc002chz.1	3	4721	72	0.00788991	0.00262997	2	11	11173.7	11172.7	2.05339	0.358188	-22322.1	-22337	lnfi+whr_qn	lnfi+whr_qn
uc002chz.1	3	4721	72	0.00788991	0.00262997	1	10	11173	11172.7	0.523952	0.469161	-22329	-22337	lnfi	lnfi
uc002chz.1	3	4721	72	0.00788991	0.00262997	1	1	11173.3	11172.7	1.1898	0.27537	-22329.7	-22337	whr_qn	whr_qn
uc002cia.1	3	4721	72	0.00788991	0.00262997	3	111	11175.6	11172.7	5.78294	0.122662	-22317.4	-22337	tg_qn+lnfi+whr_qn	lnfi+tg_qn+whr_qn
uc002cia.1	3	4721	72	0.00788991	0.00262997	2	110	11174.5	11172.7	3.65867	0.16052	-22323.7	-22337	tg_qn+lnfi	lnfi+tg_qn
uc002cia.1	3	4721	72	0.00788991	0.00262997	2	101	11175.6	11172.7	5.69954	0.0578575	-22325.7	-22337	tg_qn+whr_qn	tg_qn+whr_qn
uc002cia.1	3	4721	72	0.00788991	0.00262997	1	100	11174.5	11172.7	3.60572	0.0575811	-22332.1	-22337	tg_qn	tg_qn
uc002cia.1	3	4721	72	0.00788991	0.00262997	2	11	11173.7	11172.7	2.05339	0.358188	-22322.1	-22337	lnfi+whr_qn	lnfi+whr_qn
uc002cia.1	3	4721	72	0.00788991	0.00262997	1	10	11173	11172.7	0.523952	0.469161	-22329	-22337	lnfi	lnfi
uc002cia.1	3	4721	72	0.00788991	0.00262997	1	1	11173.3	11172.7	1.1898	0.27537	-22329.7	-22337	whr_qn	whr_qn
uc002cib.1	3	4721	72	0.00788991	0.00262997	3	111	11175.6	11172.7	5.78294	0.122662	-22317.4	-22337	tg_qn+lnfi+whr_qn	lnfi+tg_qn+whr_qn
uc002cib.1	3	4721	72	0.00788991	0.00262997	2	110	11174.5	11172.7	3.65867	0.16052	-22323.7	-22337	tg_qn+lnfi	lnfi+tg_qn
uc002cib.1	3	4721	72	0.00788991	0.00262997	2	101	11175.6	11172.7	5.69954	0.0578575	-22325.7	-22337	tg_qn+whr_qn	tg_qn+whr_qn
uc002cib.1	3	4721	72	0.00788991	0.00262997	1	100	11174.5	11172.7	3.60572	0.0575811	-22332.1	-22337	tg_qn	tg_qn
uc002cib.1	3	4721	72	0.00788991	0.00262997	2	11	11173.7	11172.7	2.05339	0.358188	-22322.1	-22337	lnfi+whr_qn	lnfi+whr_qn
uc002cib.1	3	4721	72	0.00788991	0.00262997	1	10	11173	11172.7	0.523952	0.469161	-22329	-22337	lnfi	lnfi
uc002cib.1	3	4721	72	0.00788991	0.00262997	1	1	11173.3	11172.7	1.1898	0.27537	-22329.7	-22337	whr_qn	whr_qn
uc010uuk.1	6	4721	686	0.0771784	0.0128631	3	111	8052.48	8049.64	5.68183	0.128159	-16071.1	-16090.8	tg_qn+lnfi+whr_qn	lnfi+tg_qn+whr_qn
uc010uuk.1	6	4721	686	0.0771784	0.0128631	2	110	8051.99	8049.64	4.70463	0.0951485	-16078.6	-16090.8	tg_qn+lnfi	lnfi+tg_qn
uc010uuk.1	6	4721	686	0.0771784	0.0128631	2	101	8052.47	8049.64	5.67003	0.0587175	-16079.6	-16090.8	tg_qn+whr_qn	tg_qn+whr_qn
uc010uuk.1	6	4721	686	0.0771784	0.0128631	1	100	8051.97	8049.64	4.66471	0.0307887	-16087	-16090.8	tg_qn	tg_qn
uc010uuk.1	6	4721	686	0.0771784	0.0128631	2	11	8050.1	8049.64	0.923694	0.630119	-16074.8	-16090.8	lnfi+whr_qn	lnfi+whr_qn
uc010uuk.1	6	4721	686	0.0771784	0.0128631	1	10	8049.83	8049.64	0.389793	0.532408	-16082.7	-16090.8	lnfi	lnfi
uc010uuk.1	6	4721	686	0.0771784	0.0128631	1	1	8049.81	8049.64	0.355585	0.550968	-16082.7	-16090.8	whr_qn	whr_qn
uc002cie.2	23	4721	434	0.047246	0.00205417	3	111	16609.9	16606.1	7.58459	0.0554245	-33186	-33203.8	tg_qn+lnfi+whr_qn	lnfi+tg_qn+whr_qn
uc002cie.2	23	4721	434	0.047246	0.00205417	2	110	16608.4	16606.1	4.53198	0.103727	-33191.4	-33203.8	tg_qn+lnfi	lnfi+tg_qn
uc002cie.2	23	4721	434	0.047246	0.00205417	2	101	16609.9	16606.1	7.55905	0.0228335	-33194.4	-33203.8	tg_qn+whr_qn	tg_qn+whr_qn
uc002cie.2	23	4721	434	0.047246	0.00205417	1	100	16608.3	16606.1	4.4013	0.0359116	-33199.7	-33203.8	tg_qn	tg_qn
uc002cie.2	23	4721	434	0.047246	0.00205417	2	11	16607.3	16606.1	2.42708	0.297144	-33189.3	-33203.8	lnfi+whr_qn	lnfi+whr_qn
uc002cie.2	23	4721	434	0.047246	0.00205417	1	10	16606.2	16606.1	0.215362	0.642597	-33195.6	-33203.8	lnfi	lnfi
uc002cie.2	23	4721	434	0.047246	0.00205417	1	1	16607.1	16606.1	1.89905	0.168185	-33197.2	-33203.8	whr_qn	whr_qn
uc002cic.1	25	4721	454	0.0493882	0.00197553	3	111	16740.7	16736.8	7.65306	0.0537533	-33447.5	-33465.2	tg_qn+lnfi+whr_qn	lnfi+tg_qn+whr_qn
uc002cic.1	25	4721	454	0.0493882	0.00197553	2	110	16739.2	16736.8	4.73349	0.0937857	-33453	-33465.2	tg_qn+lnfi	lnfi+tg_qn
uc002cic.1	25	4721	454	0.0493882	0.00197553	2	101	16740.6	16736.8	7.55849	0.02284	-33455.9	-33465.2	tg_qn+whr_qn	tg_qn+whr_qn
uc002cic.1	25	4721	454	0.0493882	0.00197553	1	100	16739.1	16736.8	4.45365	0.0348267	-33461.2	-33465.2	tg_qn	tg_qn
uc002cic.1	25	4721	454	0.0493882	0.00197553	2	11	16737.9	16736.8	2.17109	0.337718	-33450.5	-33465.2	lnfi+whr_qn	lnfi+whr_qn
uc002cic.1	25	4721	454	0.0493882	0.00197553	1	10	16736.9	16736.8	0.0977768	0.754514	-33456.9	-33465.2	lnfi	lnfi
uc002cic.1	25	4721	454	0.0493882	0.00197553	1	1	16737.8	16736.8	1.85239	0.173506	-33458.6	-33465.2	whr_qn	whr_qn
uc002cid.1	25	4721	454	0.0493882	0.00197553	3	111	16740.7	16736.8	7.65306	0.0537533	-33447.5	-33465.2	tg_qn+lnfi+whr_qn	lnfi+tg_qn+whr_qn
uc002cid.1	25	4721	454	0.0493882	0.00197553	2	110	16739.2	16736.8	4.73349	0.0937857	-33453	-33465.2	tg_qn+lnfi	lnfi+tg_qn
uc002cid.1	25	4721	454	0.0493882	0.00197553	2	101	16740.6	16736.8	7.55849	0.02284	-33455.9	-33465.2	tg_qn+whr_qn	tg_qn+whr_qn
uc002cid.1	25	4721	454	0.0493882	0.00197553	1	100	16739.1	16736.8	4.45365	0.0348267	-33461.2	-33465.2	tg_qn	tg_qn
uc002cid.1	25	4721	454	0.0493882	0.00197553	2	11	16737.9	16736.8	2.17109	0.337718	-33450.5	-33465.2	lnfi+whr_qn	lnfi+whr_qn
uc002cid.1	25	4721	454	0.0493882	0.00197553	1	10	16736.9	16736.8	0.0977768	0.754514	-33456.9	-33465.2	lnfi	lnfi
uc002cid.1	25	4721	454	0.0493882	0.00197553	1	1	16737.8	16736.8	1.85239	0.173506	-33458.6	-33465.2	whr_qn	whr_qn
uc002cif.1	22	4721	430	0.0468035	0.00212743	3	111	16419.8	16415.7	8.17876	0.0424582	-32805.8	-32823	tg_qn+lnfi+whr_qn	lnfi+tg_qn+whr_qn
uc002cif.1	22	4721	430	0.0468035	0.00212743	2	110	16418.2	16415.7	4.98395	0.0827463	-32811.1	-32823	tg_qn+lnfi	lnfi+tg_qn
uc002cif.1	22	4721	430	0.0468035	0.00212743	2	101	16419.8	16415.7	8.13259	0.0171408	-32814.2	-32823	tg_qn+whr_qn	tg_qn+whr_qn
uc002cif.1	22	4721	430	0.0468035	0.00212743	1	100	16418.1	16415.7	4.79254	0.0285833	-32819.3	-32823	tg_qn	tg_qn
uc002cif.1	22	4721	430	0.0468035	0.00212743	2	11	16417	16415.7	2.46888	0.290998	-32808.6	-32823	lnfi+whr_qn	lnfi+whr_qn
uc002cif.1	22	4721	430	0.0468035	0.00212743	1	10	16415.8	16415.7	0.178888	0.67233	-32814.7	-32823	lnfi	lnfi
uc002cif.1	22	4721	430	0.0468035	0.00212743	1	1	16416.7	16415.7	1.99196	0.158136	-32816.5	-32823	whr_qn	whr_qn
uc002cig.1	19	4721	609	0.0670754	0.00353028	3	111	16147.4	16144.7	5.32591	0.14943	-32261	-32281	tg_qn+lnfi+whr_qn	lnfi+tg_qn+whr_qn
uc002cig.1	19	4721	609	0.0670754	0.00353028	2	110	16146.1	16144.7	2.76611	0.250811	-32266.9	-32281	tg_qn+lnfi	lnfi+tg_qn
uc002cig.1	19	4721	609	0.0670754	0.00353028	2	101	16147.4	16144.7	5.26116	0.0720366	-32269.4	-32281	tg_qn+whr_qn	tg_qn+whr_qn
uc002cig.1	19	4721	609	0.0670754	0.00353028	1	100	16146.1	16144.7	2.75598	0.0968911	-32275.3	-32281	tg_qn	tg_qn
uc002cig.1	19	4721	609	0.0670754	0.00353028	2	11	16145.9	16144.7	2.3806	0.30413	-32266.5	-32281	lnfi+whr_qn	lnfi+whr_qn
uc002cig.1	19	4721	609	0.0670754	0.00353028	1	10	16144.9	16144.7	0.405327	0.524351	-32273	-32281	lnfi	lnfi
uc002cig.1	19	4721	609	0.0670754	0.00353028	1	1	16145.5	16144.7	1.59853	0.206111	-32274.2	-32281	whr_qn	whr_qn
uc002cih.1	19	4721	609	0.0670754	0.00353028	3	111	16147.4	16144.7	5.32591	0.14943	-32261	-32281	tg_qn+lnfi+whr_qn	lnfi+tg_qn+whr_qn
uc002cih.1	19	4721	609	0.0670754	0.00353028	2	110	16146.1	16144.7	2.76611	0.250811	-32266.9	-32281	tg_qn+lnfi	lnfi+tg_qn
uc002cih.1	19	4721	609	0.0670754	0.00353028	2	101	16147.4	16144.7	5.26116	0.0720366	-32269.4	-32281	tg_qn+whr_qn	tg_qn+whr_qn
uc002cih.1	19	4721	609	0.0670754	0.00353028	1	100	16146.1	16144.7	2.75598	0.0968911	-32275.3	-32281	tg_qn	tg_qn
uc002cih.1	19	4721	609	0.0670754	0.00353028	2	11	16145.9	16144.7	2.3806	0.30413	-32266.5	-32281	lnfi+whr_qn	lnfi+whr_qn
uc002cih.1	19	4721	609	0.0670754	0.00353028	1	10	16144.9	16144.7	0.405327	0.524351	-32273	-32281	lnfi	lnfi
uc002cih.1	19	4721	609	0.0670754	0.00353028	1	1	16145.5	16144.7	1.59853	0.206111	-32274.2	-32281	whr_qn	whr_qn
uc002cik.1	14	4721	238	0.0254575	0.00181839	3	111	16770.8	16768.7	4.30282	0.230568	-33507.8	-33528.9	tg_qn+lnfi+whr_qn	lnfi+tg_qn+whr_qn
uc002cik.1	14	4721	238	0.0254575	0.00181839	2	110	16770.7	16768.7	4.10027	0.128717	-33516.1	-33528.9	tg_qn+lnfi	lnfi+tg_qn
uc002cik.1	14	4721	238	0.0254575	0.00181839	2	101	16770.8	16768.7	4.24361	0.119815	-33516.2	-33528.9	tg_qn+whr_qn	tg_qn+whr_qn
uc002cik.1	14	4721	238	0.0254575	0.00181839	1	100	16770.7	16768.7	4.00895	0.0452593	-33524.5	-33528.9	tg_qn	tg_qn
uc002cik.1	14	4721	238	0.0254575	0.00181839	2	11	16768.8	16768.7	0.266236	0.875362	-33512.3	-33528.9	lnfi+whr_qn	lnfi+whr_qn
uc002cik.1	14	4721	238	0.0254575	0.00181839	1	10	16768.8	16768.7	0.218384	0.640274	-33520.7	-33528.9	lnfi	lnfi
uc002cik.1	14	4721	238	0.0254575	0.00181839	1	1	16768.7	16768.7	0.0190681	0.890171	-33520.5	-33528.9	whr_qn	whr_qn
uc002cim.1	8	4721	76	0.00812412	0.00101552	3	111	16082.8	16080.2	5.20914	0.157108	-32131.8	-32152	tg_qn+lnfi+whr_qn	lnfi+tg_qn+whr_qn
uc002cim.1	8	4721	76	0.00812412	0.00101552	2	110	16081.6	16080.2	2.69468	0.25993	-32137.8	-32152	tg_qn+lnfi	lnfi+tg_qn
uc002cim.1	8	4721	76	0.00812412	0.00101552	2	101	16082.8	16080.2	5.19399	0.0744972	-32140.3	-32152	tg_qn+whr_qn	tg_qn+whr_qn
uc002cim.1	8	4721	76	0.00812412	0.00101552	1	100	16081.6	16080.2	2.67546	0.101906	-32146.2	-32152	tg_qn	tg_qn
uc002cim.1	8	4721	76	0.00812412	0.00101552	2	11	16081.3	16080.2	2.17143	0.33766	-32137.3	-32152	lnfi+whr_qn	lnfi+whr_qn
uc002cim.1	8	4721	76	0.00812412	0.00101552	1	10	16080.4	16080.2	0.245813	0.620039	-32143.8	-32152	lnfi	lnfi
uc002cim.1	8	4721	76	0.00812412	0.00101552	1	1	16081	16080.2	1.61821	0.203341	-32145.2	-32152	whr_qn	whr_qn
uc010uul.1	4	4721	282	0.0319702	0.00799255	3	111	10901.5	10900.7	1.65983	0.645902	-21769.1	-21792.9	tg_qn+lnfi+whr_qn	lnfi+tg_qn+whr_qn
uc010uul.1	4	4721	282	0.0319702	0.00799255	2	110	10901.4	10900.7	1.58574	0.452544	-21777.5	-21792.9	tg_qn+lnfi	lnfi+tg_qn
uc010uul.1	4	4721	282	0.0319702	0.00799255	2	101	10900.7	10900.7	0.0303878	0.984921	-21776	-21792.9	tg_qn+whr_qn	tg_qn+whr_qn
uc010uul.1	4	4721	282	0.0319702	0.00799255	1	100	10900.7	10900.7	0.0116426	0.914074	-21784.4	-21792.9	tg_qn	tg_qn
uc010uul.1	4	4721	282	0.0319702	0.00799255	2	11	10901.4	10900.7	1.43919	0.48695	-21777.4	-21792.9	lnfi+whr_qn	lnfi+whr_qn
uc010uul.1	4	4721	282	0.0319702	0.00799255	1	10	10901.3	10900.7	1.33356	0.248172	-21785.7	-21792.9	lnfi	lnfi
uc010uul.1	4	4721	282	0.0319702	0.00799255	1	1	10900.7	10900.7	0.0196972	0.888386	-21784.4	-21792.9	whr_qn	whr_qn
uc002cii.1	35	4721	1127	0.124285	0.00355101	3	111	16623.9	16621.5	4.73905	0.191933	-33213.9	-33234.6	tg_qn+lnfi+whr_qn	lnfi+tg_qn+whr_qn
uc002cii.1	35	4721	1127	0.124285	0.00355101	2	110	16623.1	16621.5	3.13919	0.208129	-33220.8	-33234.6	tg_qn+lnfi	lnfi+tg_qn
uc002cii.1	35	4721	1127	0.124285	0.00355101	2	101	16623.7	16621.5	4.42819	0.109253	-33222.1	-33234.6	tg_qn+whr_qn	tg_qn+whr_qn
uc002cii.1	35	4721	1127	0.124285	0.00355101	1	100	16623	16621.5	2.98195	0.0841979	-33229.1	-33234.6	tg_qn	tg_qn
uc002cii.1	35	4721	1127	0.124285	0.00355101	2	11	16622.6	16621.5	2.15673	0.340151	-33219.8	-33234.6	lnfi+whr_qn	lnfi+whr_qn
uc002cii.1	35	4721	1127	0.124285	0.00355101	1	10	16622	16621.5	0.986834	0.320518	-33227.1	-33234.6	lnfi	lnfi
uc002cii.1	35	4721	1127	0.124285	0.00355101	1	1	16621.9	16621.5	0.773114	0.379255	-33226.9	-33234.6	whr_qn	whr_qn
uc002cij.1	35	4721	1127	0.124285	0.00355101	3	111	16623.9	16621.5	4.73905	0.191933	-33213.9	-33234.6	tg_qn+lnfi+whr_qn	lnfi+tg_qn+whr_qn
uc002cij.1	35	4721	1127	0.124285	0.00355101	2	110	16623.1	16621.5	3.13919	0.208129	-33220.8	-33234.6	tg_qn+lnfi	lnfi+tg_qn
uc002cij.1	35	4721	1127	0.124285	0.00355101	2	101	16623.7	16621.5	4.42819	0.109253	-33222.1	-33234.6	tg_qn+whr_qn	tg_qn+whr_qn
uc002cij.1	35	4721	1127	0.124285	0.00355101	1	100	16623	16621.5	2.98195	0.0841979	-33229.1	-33234.6	tg_qn	tg_qn
uc002cij.1	35	4721	1127	0.124285	0.00355101	2	11	16622.6	16621.5	2.15673	0.340151	-33219.8	-33234.6	lnfi+whr_qn	lnfi+whr_qn
uc002cij.1	35	4721	1127	0.124285	0.00355101	1	10	16622	16621.5	0.986834	0.320518	-33227.1	-33234.6	lnfi	lnfi
uc002cij.1	35	4721	1127	0.124285	0.00355101	1	1	16621.9	16621.5	0.773114	0.379255	-33226.9	-33234.6	whr_qn	whr_qn
uc002cil.1	16	4721	518	0.0572101	0.00357563	3	111	15809.6	15808.2	2.61384	0.455069	-31585.3	-31608	tg_qn+lnfi+whr_qn	lnfi+tg_qn+whr_qn
uc002cil.1	16	4721	518	0.0572101	0.00357563	2	110	15809.4	15808.2	2.31897	0.313648	-31593.4	-31608	tg_qn+lnfi	lnfi+tg_qn
uc002cil.1	16	4721	518	0.0572101	0.00357563	2	101	15809.3	15808.2	2.06122	0.356789	-31593.2	-31608	tg_qn+whr_qn	tg_qn+whr_qn
uc002cil.1	16	4721	518	0.0572101	0.00357563	1	100	15809.2	15808.2	1.85875	0.172769	-31601.4	-31608	tg_qn	tg_qn
uc002cil.1	16	4721	518	0.0572101	0.00357563	2	11	15809	15808.2	1.44623	0.485239	-31592.6	-31608	lnfi+whr_qn	lnfi+whr_qn
uc002cil.1	16	4721	518	0.0572101	0.00357563	1	10	15808.9	15808.2	1.27057	0.259661	-31600.8	-31608	lnfi	lnfi
uc002cil.1	16	4721	518	0.0572101	0.00357563	1	1	15808.3	15808.2	0.0440718	0.83372	-31599.6	-31608	whr_qn	whr_qn
uc002cin.1	10	4721	334	0.0375312	0.00375312	3	111	14824.5	14823.4	2.2765	0.517038	-29615.2	-29638.3	tg_qn+lnfi+whr_qn	lnfi+tg_qn+whr_qn
uc002cin.1	10	4721	334	0.0375312	0.00375312	2	110	14824	14823.4	1.33096	0.514027	-29622.7	-29638.3	tg_qn+lnfi	lnfi+tg_qn
uc002cin.1	10	4721	334	0.0375312	0.00375312	2	101	14823.8	14823.4	0.935188	0.626508	-29622.3	-29638.3	tg_qn+whr_qn	tg_qn+whr_qn
uc002cin.1	10	4721	334	0.0375312	0.00375312	1	100	14823.5	14823.4	0.25213	0.61558	-29630	-29638.3	tg_qn	tg_qn
uc002cin.1	10	4721	334	0.0375312	0.00375312	2	11	14824.5	14823.4	2.23159	0.327655	-29623.6	-29638.3	lnfi+whr_qn	lnfi+whr_qn
uc002cin.1	10	4721	334	0.0375312	0.00375312	1	10	14824	14823.4	1.31839	0.250881	-29631.1	-29638.3	lnfi	lnfi
uc002cin.1	10	4721	334	0.0375312	0.00375312	1	1	14823.6	14823.4	0.526874	0.467924	-29630.3	-29638.3	whr_qn	whr_qn
uc002cio.1	4	4721	282	0.0319702	0.00799255	3	111	10901.5	10900.7	1.65983	0.645902	-21769.1	-21792.9	tg_qn+lnfi+whr_qn	lnfi+tg_qn+whr_qn
uc002cio.1	4	4721	282	0.0319702	0.00799255	2	110	10901.4	10900.7	1.58574	0.452544	-21777.5	-21792.9	tg_qn+lnfi	lnfi+tg_qn
uc002cio.1	4	4721	282	0.0319702	0.00799255	2	101	10900.7	10900.7	0.0303878	0.984921	-21776	-21792.9	tg_qn+whr_qn	tg_qn+whr_qn
uc002cio.1	4	4721	282	0.0319702	0.00799255	1	100	10900.7	10900.7	0.0116426	0.914074	-21784.4	-21792.9	tg_qn	tg_qn
uc002cio.1	4	4721	282	0.0319702	0.00799255	2	11	10901.4	10900.7	1.43919	0.48695	-21777.4	-21792.9	lnfi+whr_qn	lnfi+whr_qn
uc002cio.1	4	4721	282	0.0319702	0.00799255	1	10	10901.3	10900.7	1.33356	0.248172	-21785.7	-21792.9	lnfi	lnfi
uc002cio.1	4	4721	282	0.0319702	0.00799255	1	1	10900.7	10900.7	0.0196972	0.888386	-21784.4	-21792.9	whr_qn	whr_qn
uc010bqx.1	4	4721	282	0.0319702	0.00799255	3	111	10901.5	10900.7	1.65983	0.645902	-21769.1	-21792.9	tg_qn+lnfi+whr_qn	lnfi+tg_qn+whr_qn
uc010bqx.1	4	4721	282	0.0319702	0.00799255	2	110	10901.4	10900.7	1.58574	0.452544	-21777.5	-21792.9	tg_qn+lnfi	lnfi+tg_qn
uc010bqx.1	4	4721	282	0.0319702	0.00799255	2	101	10900.7	10900.7	0.0303878	0.984921	-21776	-21792.9	tg_qn+whr_qn	tg_qn+whr_qn
uc010bqx.1	4	4721	282	0.0319702	0.00799255	1	100	10900.7	10900.7	0.0116426	0.914074	-21784.4	-21792.9	tg_qn	tg_qn
uc010bqx.1	4	4721	282	0.0319702	0.00799255	2	11	10901.4	10900.7	1.43919	0.48695	-21777.4	-21792.9	lnfi+whr_qn	lnfi+whr_qn
uc010bqx.1	4	4721	282	0.0319702	0.00799255	1	10	10901.3	10900.7	1.33356	0.248172	-21785.7	-21792.9	lnfi	lnfi
uc010bqx.1	4	4721	282	0.0319702	0.00799255	1	1	10900.7	10900.7	0.0196972	0.888386	-21784.4	-21792.9	whr_qn	whr_qn
uc010uum.1	10	4721	287	0.0312613	0.00312613	3	111	14408.2	14407.4	1.64194	0.649917	-28782.6	-28806.3	tg_qn+lnfi+whr_qn	lnfi+tg_qn+whr_qn
uc010uum.1	10	4721	287	0.0312613	0.00312613	2	110	14408.2	14407.4	1.58955	0.451683	-28791	-28806.3	tg_qn+lnfi	lnfi+tg_qn
uc010uum.1	10	4721	287	0.0312613	0.00312613	2	101	14408.1	14407.4	1.47378	0.478601	-28790.9	-28806.3	tg_qn+whr_qn	tg_qn+whr_qn
uc010uum.1	10	4721	287	0.0312613	0.00312613	1	100	14408.1	14407.4	1.42672	0.2323	-28799.3	-28806.3	tg_qn	tg_qn
uc010uum.1	10	4721	287	0.0312613	0.00312613	2	11	14407.5	14407.4	0.158365	0.923871	-28789.6	-28806.3	lnfi+whr_qn	lnfi+whr_qn
uc010uum.1	10	4721	287	0.0312613	0.00312613	1	10	14407.4	14407.4	0.0614344	0.804243	-28798	-28806.3	lnfi	lnfi
uc010uum.1	10	4721	287	0.0312613	0.00312613	1	1	14407.5	14407.4	0.104877	0.746054	-28798	-28806.3	whr_qn	whr_qn
uc002cip.2	23	4721	837	0.0908065	0.00394811	3	111	14337.7	14337	1.46786	0.689708	-28641.6	-28665.5	tg_qn+lnfi+whr_qn	lnfi+tg_qn+whr_qn
uc002cip.2	23	4721	837	0.0908065	0.00394811	2	110	14337.7	14337	1.42429	0.490592	-28650	-28665.5	tg_qn+lnfi	lnfi+tg_qn
uc002cip.2	23	4721	837	0.0908065	0.00394811	2	101	14337.7	14337	1.39642	0.497476	-28649.9	-28665.5	tg_qn+whr_qn	tg_qn+whr_qn
uc002cip.2	23	4721	837	0.0908065	0.00394811	1	100	14337.6	14337	1.3459	0.245997	-28658.3	-28665.5	tg_qn	tg_qn
uc002cip.2	23	4721	837	0.0908065	0.00394811	2	11	14337	14337	0.109986	0.946492	-28648.7	-28665.5	lnfi+whr_qn	lnfi+whr_qn
uc002cip.2	23	4721	837	0.0908065	0.00394811	1	10	14337	14337	0.0773931	0.780862	-28657.1	-28665.5	lnfi	lnfi
uc002cip.2	23	4721	837	0.0908065	0.00394811	1	1	14337	14337	0.0363362	0.848823	-28657	-28665.5	whr_qn	whr_qn
uc002ciq.2	23	4721	837	0.0908065	0.00394811	3	111	14337.7	14337	1.46786	0.689708	-28641.6	-28665.5	tg_qn+lnfi+whr_qn	lnfi+tg_qn+whr_qn
uc002ciq.2	23	4721	837	0.0908065	0.00394811	2	110	14337.7	14337	1.42429	0.490592	-28650	-28665.5	tg_qn+lnfi	lnfi+tg_qn
uc002ciq.2	23	4721	837	0.0908065	0.00394811	2	101	14337.7	14337	1.39642	0.497476	-28649.9	-28665.5	tg_qn+whr_qn	tg_qn+whr_qn
uc002ciq.2	23	4721	837	0.0908065	0.00394811	1	100	14337.6	14337	1.3459	0.245997	-28658.3	-28665.5	tg_qn	tg_qn
uc002ciq.2	23	4721	837	0.0908065	0.00394811	2	11	14337	14337	0.109986	0.946492	-28648.7	-28665.5	lnfi+whr_qn	lnfi+whr_qn
uc002ciq.2	23	4721	837	0.0908065	0.00394811	1	10	14337	14337	0.0773931	0.780862	-28657.1	-28665.5	lnfi	lnfi
uc002ciq.2	23	4721	837	0.0908065	0.00394811	1	1	14337	14337	0.0363362	0.848823	-28657	-28665.5	whr_qn	whr_qn
uc010bqy.2	11	4721	544	0.0588904	0.00535368	3	111	12960.2	12959.5	1.29678	0.729897	-25886.5	-25910.6	tg_qn+lnfi+whr_qn	lnfi+tg_qn+whr_qn
uc010bqy.2	11	4721	544	0.0588904	0.00535368	2	110	12960.2	12959.5	1.23567	0.53911	-25894.9	-25910.6	tg_qn+lnfi	lnfi+tg_qn
uc010bqy.2	11	4721	544	0.0588904	0.00535368	2	101	12960.2	12959.5	1.27837	0.527723	-25895	-25910.6	tg_qn+whr_qn	tg_qn+whr_qn
uc010bqy.2	11	4721	544	0.0588904	0.00535368	1	100	12960.1	12959.5	1.21049	0.271235	-25903.4	-25910.6	tg_qn	tg_qn
uc010bqy.2	11	4721	544	0.0588904	0.00535368	2	11	12959.6	12959.5	0.113307	0.944921	-25893.8	-25910.6	lnfi+whr_qn	lnfi+whr_qn
uc010bqy.2	11	4721	544	0.0588904	0.00535368	1	10	12959.6	12959.5	0.093443	0.759845	-25902.2	-25910.6	lnfi	lnfi
uc010bqy.2	11	4721	544	0.0588904	0.00535368	1	1	12959.5	12959.5	0.0123971	0.911345	-25902.2	-25910.6	whr_qn	whr_qn
uc002cit.2	5	4721	186	0.0199341	0.00398682	3	111	12872.6	12872.4	0.419388	0.936209	-25711.3	-25736.3	tg_qn+lnfi+whr_qn	lnfi+tg_qn+whr_qn
uc002cit.2	5	4721	186	0.0199341	0.00398682	2	110	12872.5	12872.4	0.281387	0.868756	-25719.6	-25736.3	tg_qn+lnfi	lnfi+tg_qn
uc002cit.2	5	4721	186	0.0199341	0.00398682	2	101	12872.6	12872.4	0.410584	0.814409	-25719.8	-25736.3	tg_qn+whr_qn	tg_qn+whr_qn
uc002cit.2	5	4721	186	0.0199341	0.00398682	1	100	12872.5	12872.4	0.263157	0.607959	-25728.1	-25736.3	tg_qn	tg_qn
uc002cit.2	5	4721	186	0.0199341	0.00398682	2	11	12872.5	12872.4	0.265486	0.87569	-25719.6	-25736.3	lnfi+whr_qn	lnfi+whr_qn
uc002cit.2	5	4721	186	0.0199341	0.00398682	1	10	12872.4	12872.4	0.0902964	0.763801	-25727.9	-25736.3	lnfi	lnfi
uc002cit.2	5	4721	186	0.0199341	0.00398682	1	1	12872.5	12872.4	0.216601	0.641642	-25728	-25736.3	whr_qn	whr_qn
uc002ciu.2	5	4721	186	0.0199341	0.00398682	3	111	12872.6	12872.4	0.419388	0.936209	-25711.3	-25736.3	tg_qn+lnfi+whr_qn	lnfi+tg_qn+whr_qn
uc002ciu.2	5	4721	186	0.0199341	0.00398682	2	110	12872.5	12872.4	0.281387	0.868756	-25719.6	-25736.3	tg_qn+lnfi	lnfi+tg_qn
uc002ciu.2	5	4721	186	0.0199341	0.00398682	2	101	12872.6	12872.4	0.410584	0.814409	-25719.8	-25736.3	tg_qn+whr_qn	tg_qn+whr_qn
uc002ciu.2	5	4721	186	0.0199341	0.00398682	1	100	12872.5	12872.4	0.263157	0.607959	-25728.1	-25736.3	tg_qn	tg_qn
uc002ciu.2	5	4721	186	0.0199341	0.00398682	2	11	12872.5	12872.4	0.265486	0.87569	-25719.6	-25736.3	lnfi+whr_qn	lnfi+whr_qn
uc002ciu.2	5	4721	186	0.0199341	0.00398682	1	10	12872.4	12872.4	0.0902964	0.763801	-25727.9	-25736.3	lnfi	lnfi
uc002ciu.2	5	4721	186	0.0199341	0.00398682	1	1	12872.5	12872.4	0.216601	0.641642	-25728	-25736.3	whr_qn	whr_qn
uc010bqz.2	5	4721	186	0.0199341	0.00398682	3	111	12872.6	12872.4	0.419388	0.936209	-25711.3	-25736.3	tg_qn+lnfi+whr_qn	lnfi+tg_qn+whr_qn
uc010bqz.2	5	4721	186	0.0199341	0.00398682	2	110	12872.5	12872.4	0.281387	0.868756	-25719.6	-25736.3	tg_qn+lnfi	lnfi+tg_qn
uc010bqz.2	5	4721	186	0.0199341	0.00398682	2	101	12872.6	12872.4	0.410584	0.814409	-25719.8	-25736.3	tg_qn+whr_qn	tg_qn+whr_qn
uc010bqz.2	5	4721	186	0.0199341	0.00398682	1	100	12872.5	12872.4	0.263157	0.607959	-25728.1	-25736.3	tg_qn	tg_qn
uc010bqz.2	5	4721	186	0.0199341	0.00398682	2	11	12872.5	12872.4	0.265486	0.87569	-25719.6	-25736.3	lnfi+whr_qn	lnfi+whr_qn
uc010bqz.2	5	4721	186	0.0199341	0.00398682	1	10	12872.4	12872.4	0.0902964	0.763801	-25727.9	-25736.3	lnfi	lnfi
uc010bqz.2	5	4721	186	0.0199341	0.00398682	1	1	12872.5	12872.4	0.216601	0.641642	-25728	-25736.3	whr_qn	whr_qn
uc002civ.2	5	4721	186	0.0199341	0.00398682	3	111	12872.6	12872.4	0.419388	0.936209	-25711.3	-25736.3	tg_qn+lnfi+whr_qn	lnfi+tg_qn+whr_qn
uc002civ.2	5	4721	186	0.0199341	0.00398682	2	110	12872.5	12872.4	0.281387	0.868756	-25719.6	-25736.3	tg_qn+lnfi	lnfi+tg_qn
uc002civ.2	5	4721	186	0.0199341	0.00398682	2	101	12872.6	12872.4	0.410584	0.814409	-25719.8	-25736.3	tg_qn+whr_qn	tg_qn+whr_qn
uc002civ.2	5	4721	186	0.0199341	0.00398682	1	100	12872.5	12872.4	0.263157	0.607959	-25728.1	-25736.3	tg_qn	tg_qn
uc002civ.2	5	4721	186	0.0199341	0.00398682	2	11	12872.5	12872.4	0.265486	0.87569	-25719.6	-25736.3	lnfi+whr_qn	lnfi+whr_qn
uc002civ.2	5	4721	186	0.0199341	0.00398682	1	10	12872.4	12872.4	0.0902964	0.763801	-25727.9	-25736.3	lnfi	lnfi
uc002civ.2	5	4721	186	0.0199341	0.00398682	1	1	12872.5	12872.4	0.216601	0.641642	-25728	-25736.3	whr_qn	whr_qn
uc002ciw.1	9	4721	383	0.0410329	0.00455922	3	111	12474.3	12473.7	1.03387	0.793056	-24914.7	-24939	tg_qn+lnfi+whr_qn	lnfi+tg_qn+whr_qn
uc002ciw.1	9	4721	383	0.0410329	0.00455922	2	110	12474.3	12473.7	1.02339	0.59948	-24923.1	-24939	tg_qn+lnfi	lnfi+tg_qn
uc002ciw.1	9	4721	383	0.0410329	0.00455922	2	101	12474.3	12473.7	1.01629	0.601609	-24923.1	-24939	tg_qn+whr_qn	tg_qn+whr_qn
uc002ciw.1	9	4721	383	0.0410329	0.00455922	1	100	12474.2	12473.7	1.00688	0.315652	-24931.6	-24939	tg_qn	tg_qn
uc002ciw.1	9	4721	383	0.0410329	0.00455922	2	11	12473.9	12473.7	0.22041	0.895651	-24922.3	-24939	lnfi+whr_qn	lnfi+whr_qn
uc002ciw.1	9	4721	383	0.0410329	0.00455922	1	10	12473.9	12473.7	0.211817	0.645347	-24930.8	-24939	lnfi	lnfi
uc002ciw.1	9	4721	383	0.0410329	0.00455922	1	1	12473.8	12473.7	0.0233997	0.878422	-24930.6	-24939	whr_qn	whr_qn
uc002cix.1	9	4721	383	0.0410329	0.00455922	3	111	12474.3	12473.7	1.03387	0.793056	-24914.7	-24939	tg_qn+lnfi+whr_qn	lnfi+tg_qn+whr_qn
uc002cix.1	9	4721	383	0.0410329	0.00455922	2	110	12474.3	12473.7	1.02339	0.59948	-24923.1	-24939	tg_qn+lnfi	lnfi+tg_qn
uc002cix.1	9	4721	383	0.0410329	0.00455922	2	101	12474.3	12473.7	1.01629	0.601609	-24923.1	-24939	tg_qn+whr_qn	tg_qn+whr_qn
uc002cix.1	9	4721	383	0.0410329	0.00455922	1	100	12474.2	12473.7	1.00688	0.315652	-24931.6	-24939	tg_qn	tg_qn
uc002cix.1	9	4721	383	0.0410329	0.00455922	2	11	12473.9	12473.7	0.22041	0.895651	-24922.3	-24939	lnfi+whr_qn	lnfi+whr_qn
uc002cix.1	9	4721	383	0.0410329	0.00455922	1	10	12473.9	12473.7	0.211817	0.645347	-24930.8	-24939	lnfi	lnfi
uc002cix.1	9	4721	383	0.0410329	0.00455922	1	1	12473.8	12473.7	0.0233997	0.878422	-24930.6	-24939	whr_qn	whr_qn
uc002ciy.1	9	4721	383	0.0410329	0.00455922	3	111	12474.3	12473.7	1.03387	0.793056	-24914.7	-24939	tg_qn+lnfi+whr_qn	lnfi+tg_qn+whr_qn
uc002ciy.1	9	4721	383	0.0410329	0.00455922	2	110	12474.3	12473.7	1.02339	0.59948	-24923.1	-24939	tg_qn+lnfi	lnfi+tg_qn
uc002ciy.1	9	4721	383	0.0410329	0.00455922	2	101	12474.3	12473.7	1.01629	0.601609	-24923.1	-24939	tg_qn+whr_qn	tg_qn+whr_qn
uc002ciy.1	9	4721	383	0.0410329	0.00455922	1	100	12474.2	12473.7	1.00688	0.315652	-24931.6	-24939	tg_qn	tg_qn
uc002ciy.1	9	4721	383	0.0410329	0.00455922	2	11	12473.9	12473.7	0.22041	0.895651	-24922.3	-24939	lnfi+whr_qn	lnfi+whr_qn
uc002ciy.1	9	4721	383	0.0410329	0.00455922	1	10	12473.9	12473.7	0.211817	0.645347	-24930.8	-24939	lnfi	lnfi
uc002ciy.1	9	4721	383	0.0410329	0.00455922	1	1	12473.8	12473.7	0.0233997	0.878422	-24930.6	-24939	whr_qn	whr_qn
uc002ciz.1	12	4721	658	0.0711948	0.0059329	3	111	11605.3	11604	2.5546	0.465504	-23176.7	-23199.5	tg_qn+lnfi+whr_qn	lnfi+tg_qn+whr_qn
uc002ciz.1	12	4721	658	0.0711948	0.0059329	2	110	11605.1	11604	2.14874	0.341514	-23184.8	-23199.5	tg_qn+lnfi	lnfi+tg_qn
uc002ciz.1	12	4721	658	0.0711948	0.0059329	2	101	11605	11604	2.06306	0.356461	-23184.7	-23199.5	tg_qn+whr_qn	tg_qn+whr_qn
uc002ciz.1	12	4721	658	0.0711948	0.0059329	1	100	11604.9	11604	1.74738	0.186207	-23192.8	-23199.5	tg_qn	tg_qn
uc002ciz.1	12	4721	658	0.0711948	0.0059329	2	11	11604.3	11604	0.692454	0.707352	-23183.3	-23199.5	lnfi+whr_qn	lnfi+whr_qn
uc002ciz.1	12	4721	658	0.0711948	0.0059329	1	10	11604	11604	0.0646379	0.79931	-23191.2	-23199.5	lnfi	lnfi
uc002ciz.1	12	4721	658	0.0711948	0.0059329	1	1	11604.3	11604	0.589495	0.442615	-23191.7	-23199.5	whr_qn	whr_qn
uc002cja.2	5	4721	140	0.0158398	0.00316795	3	111	13534.6	13532.2	4.91	0.178508	-27035.4	-27055.8	tg_qn+lnfi+whr_qn	lnfi+tg_qn+whr_qn
uc002cja.2	5	4721	140	0.0158398	0.00316795	2	110	13534.6	13532.2	4.81852	0.0898817	-27043.7	-27055.8	tg_qn+lnfi	lnfi+tg_qn
uc002cja.2	5	4721	140	0.0158398	0.00316795	2	101	13533.4	13532.2	2.51182	0.284817	-27041.4	-27055.8	tg_qn+whr_qn	tg_qn+whr_qn
uc002cja.2	5	4721	140	0.0158398	0.00316795	1	100	13533.3	13532.2	2.25674	0.133034	-27049.6	-27055.8	tg_qn	tg_qn
uc002cja.2	5	4721	140	0.0158398	0.00316795	2	11	13532.6	13532.2	0.898303	0.63817	-27039.8	-27055.8	lnfi+whr_qn	lnfi+whr_qn
uc002cja.2	5	4721	140	0.0158398	0.00316795	1	10	13532.6	13532.2	0.886004	0.346562	-27048.3	-27055.8	lnfi	lnfi
uc002cja.2	5	4721	140	0.0158398	0.00316795	1	1	13532.2	13532.2	0.0581445	0.809453	-27047.4	-27055.8	whr_qn	whr_qn
uc002cjb.2	6	4721	143	0.0161576	0.00269294	3	111	14261.8	14258.8	5.85832	0.118711	-28489.7	-28509.2	tg_qn+lnfi+whr_qn	lnfi+tg_qn+whr_qn
uc002cjb.2	6	4721	143	0.0161576	0.00269294	2	110	14261.7	14258.8	5.67615	0.0585383	-28497.9	-28509.2	tg_qn+lnfi	lnfi+tg_qn
uc002cjb.2	6	4721	143	0.0161576	0.00269294	2	101	14260.5	14258.8	3.2938	0.192646	-28495.6	-28509.2	tg_qn+whr_qn	tg_qn+whr_qn
uc002cjb.2	6	4721	143	0.0161576	0.00269294	1	100	14260.3	14258.8	2.88152	0.0896011	-28503.6	-28509.2	tg_qn	tg_qn
uc002cjb.2	6	4721	143	0.0161576	0.00269294	2	11	14259.3	14258.8	0.908057	0.635065	-28493.2	-28509.2	lnfi+whr_qn	lnfi+whr_qn
uc002cjb.2	6	4721	143	0.0161576	0.00269294	1	10	14259.3	14258.8	0.877095	0.348999	-28501.6	-28509.2	lnfi	lnfi
uc002cjb.2	6	4721	143	0.0161576	0.00269294	1	1	14258.9	14258.8	0.112834	0.736941	-28500.8	-28509.2	whr_qn	whr_qn
uc002cjc.2	26	4721	556	0.0620688	0.00238726	3	111	15371.2	15368.6	5.27347	0.152833	-30708.7	-30728.8	tg_qn+lnfi+whr_qn	lnfi+tg_qn+whr_qn
uc002cjc.2	26	4721	556	0.0620688	0.00238726	2	110	15371.1	15368.6	5.00821	0.0817488	-30716.9	-30728.8	tg_qn+lnfi	lnfi+tg_qn
uc002cjc.2	26	4721	556	0.0620688	0.00238726	2	101	15370.7	15368.6	4.23295	0.120455	-30716.1	-30728.8	tg_qn+whr_qn	tg_qn+whr_qn
uc002cjc.2	26	4721	556	0.0620688	0.00238726	1	100	15370.5	15368.6	3.80676	0.0510461	-30724.1	-30728.8	tg_qn	tg_qn
uc002cjc.2	26	4721	556	0.0620688	0.00238726	2	11	15368.7	15368.6	0.172648	0.917297	-30712	-30728.8	lnfi+whr_qn	lnfi+whr_qn
uc002cjc.2	26	4721	556	0.0620688	0.00238726	1	10	15368.7	15368.6	0.104537	0.746451	-30720.4	-30728.8	lnfi	lnfi
uc002cjc.2	26	4721	556	0.0620688	0.00238726	1	1	15368.7	15368.6	0.0955614	0.757223	-30720.4	-30728.8	whr_qn	whr_qn
uc002cjd.2	10	4721	22	0.00240071	0.000240071	3	111	17913.9	17913.3	1.28069	0.733723	-35794	-35818.1	tg_qn+lnfi+whr_qn	lnfi+tg_qn+whr_qn
uc002cjd.2	10	4721	22	0.00240071	0.000240071	2	110	17913.9	17913.3	1.11315	0.573169	-35802.3	-35818.1	tg_qn+lnfi	lnfi+tg_qn
uc002cjd.2	10	4721	22	0.00240071	0.000240071	2	101	17913.8	17913.3	1.06676	0.586618	-35802.3	-35818.1	tg_qn+whr_qn	tg_qn+whr_qn
uc002cjd.2	10	4721	22	0.00240071	0.000240071	1	100	17913.7	17913.3	0.840709	0.359194	-35810.5	-35818.1	tg_qn	tg_qn
uc002cjd.2	10	4721	22	0.00240071	0.000240071	2	11	17913.4	17913.3	0.10198	0.950288	-35801.3	-35818.1	lnfi+whr_qn	lnfi+whr_qn
uc002cjd.2	10	4721	22	0.00240071	0.000240071	1	10	17913.3	17913.3	0.0225708	0.880579	-35809.7	-35818.1	lnfi	lnfi
uc002cjd.2	10	4721	22	0.00240071	0.000240071	1	1	17913.3	17913.3	0.0933019	0.760021	-35809.8	-35818.1	whr_qn	whr_qn
uc010bra.1	9	4721	36	0.00395946	0.00043994	3	111	17026.4	17025	2.65379	0.448137	-34018.9	-34041.6	tg_qn+lnfi+whr_qn	lnfi+tg_qn+whr_qn
uc010bra.1	9	4721	36	0.00395946	0.00043994	2	110	17026.3	17025	2.52233	0.283324	-34027.2	-34041.6	tg_qn+lnfi	lnfi+tg_qn
uc010bra.1	9	4721	36	0.00395946	0.00043994	2	101	17026.3	17025	2.42817	0.296981	-34027.1	-34041.6	tg_qn+whr_qn	tg_qn+whr_qn
uc010bra.1	9	4721	36	0.00395946	0.00043994	1	100	17026.2	17025	2.33688	0.126342	-34035.5	-34041.6	tg_qn	tg_qn
uc010bra.1	9	4721	36	0.00395946	0.00043994	2	11	17025.2	17025	0.325532	0.84979	-34025	-34041.6	lnfi+whr_qn	lnfi+whr_qn
uc010bra.1	9	4721	36	0.00395946	0.00043994	1	10	17025.1	17025	0.0245134	0.875586	-34033.2	-34041.6	lnfi	lnfi
uc010bra.1	9	4721	36	0.00395946	0.00043994	1	1	17025.2	17025	0.323267	0.569651	-34033.5	-34041.6	whr_qn	whr_qn
uc002cje.2	3	4721	9	0.000981077	0.000327026	3	111	17299.7	17299.3	0.897802	0.825958	-34565.6	-34590.1	tg_qn+lnfi+whr_qn	lnfi+tg_qn+whr_qn
uc002cje.2	3	4721	9	0.000981077	0.000327026	2	110	17299.7	17299.3	0.872069	0.646595	-34574	-34590.1	tg_qn+lnfi	lnfi+tg_qn
uc002cje.2	3	4721	9	0.000981077	0.000327026	2	101	17299.6	17299.3	0.754858	0.685622	-34573.9	-34590.1	tg_qn+whr_qn	tg_qn+whr_qn
uc002cje.2	3	4721	9	0.000981077	0.000327026	1	100	17299.6	17299.3	0.714063	0.398098	-34582.3	-34590.1	tg_qn	tg_qn
uc002cje.2	3	4721	9	0.000981077	0.000327026	2	11	17299.5	17299.3	0.436785	0.80381	-34573.6	-34590.1	lnfi+whr_qn	lnfi+whr_qn
uc002cje.2	3	4721	9	0.000981077	0.000327026	1	10	17299.5	17299.3	0.388959	0.532847	-34582	-34590.1	lnfi	lnfi
uc002cje.2	3	4721	9	0.000981077	0.000327026	1	1	17299.3	17299.3	0.103543	0.747618	-34581.7	-34590.1	whr_qn	whr_qn
uc002cjf.2	6	4721	33	0.00362514	0.00060419	3	111	17800.3	17799.4	1.80486	0.613878	-35566.8	-35590.3	tg_qn+lnfi+whr_qn	lnfi+tg_qn+whr_qn
uc002cjf.2	6	4721	33	0.00362514	0.00060419	2	110	17800.1	17799.4	1.48095	0.476887	-35574.9	-35590.3	tg_qn+lnfi	lnfi+tg_qn
uc002cjf.2	6	4721	33	0.00362514	0.00060419	2	101	17800.3	17799.4	1.79585	0.407414	-35575.2	-35590.3	tg_qn+whr_qn	tg_qn+whr_qn
uc002cjf.2	6	4721	33	0.00362514	0.00060419	1	100	17800.1	17799.4	1.47343	0.224806	-35583.4	-35590.3	tg_qn	tg_qn
uc002cjf.2	6	4721	33	0.00362514	0.00060419	2	11	17799.8	17799.4	0.71165	0.700595	-35574.1	-35590.3	lnfi+whr_qn	lnfi+whr_qn
uc002cjf.2	6	4721	33	0.00362514	0.00060419	1	10	17799.5	17799.4	0.225066	0.635207	-35582.1	-35590.3	lnfi	lnfi
uc002cjf.2	6	4721	33	0.00362514	0.00060419	1	1	17799.7	17799.4	0.596118	0.440063	-35582.5	-35590.3	whr_qn	whr_qn
uc002cji.3	9	4721	123	0.0135956	0.00151062	3	111	15947	15945.3	3.41192	0.332366	-31860.2	-31882.1	tg_qn+lnfi+whr_qn	lnfi+tg_qn+whr_qn
uc002cji.3	9	4721	123	0.0135956	0.00151062	2	110	15947	15945.3	3.31118	0.19098	-31868.5	-31882.1	tg_qn+lnfi	lnfi+tg_qn
uc002cji.3	9	4721	123	0.0135956	0.00151062	2	101	15946.6	15945.3	2.55284	0.279034	-31867.8	-31882.1	tg_qn+whr_qn	tg_qn+whr_qn
uc002cji.3	9	4721	123	0.0135956	0.00151062	1	100	15946.5	15945.3	2.35768	0.124668	-31876	-31882.1	tg_qn	tg_qn
uc002cji.3	9	4721	123	0.0135956	0.00151062	2	11	15945.4	15945.3	0.140452	0.932183	-31865.4	-31882.1	lnfi+whr_qn	lnfi+whr_qn
uc002cji.3	9	4721	123	0.0135956	0.00151062	1	10	15945.4	15945.3	0.125853	0.722771	-31873.8	-31882.1	lnfi	lnfi
uc002cji.3	9	4721	123	0.0135956	0.00151062	1	1	15945.3	15945.3	0.0307282	0.860848	-31873.7	-31882.1	whr_qn	whr_qn
uc002cjg.2	9	4721	123	0.0135956	0.00151062	3	111	15947	15945.3	3.41192	0.332366	-31860.2	-31882.1	tg_qn+lnfi+whr_qn	lnfi+tg_qn+whr_qn
uc002cjg.2	9	4721	123	0.0135956	0.00151062	2	110	15947	15945.3	3.31118	0.19098	-31868.5	-31882.1	tg_qn+lnfi	lnfi+tg_qn
uc002cjg.2	9	4721	123	0.0135956	0.00151062	2	101	15946.6	15945.3	2.55284	0.279034	-31867.8	-31882.1	tg_qn+whr_qn	tg_qn+whr_qn
uc002cjg.2	9	4721	123	0.0135956	0.00151062	1	100	15946.5	15945.3	2.35768	0.124668	-31876	-31882.1	tg_qn	tg_qn
uc002cjg.2	9	4721	123	0.0135956	0.00151062	2	11	15945.4	15945.3	0.140452	0.932183	-31865.4	-31882.1	lnfi+whr_qn	lnfi+whr_qn
uc002cjg.2	9	4721	123	0.0135956	0.00151062	1	10	15945.4	15945.3	0.125853	0.722771	-31873.8	-31882.1	lnfi	lnfi
uc002cjg.2	9	4721	123	0.0135956	0.00151062	1	1	15945.3	15945.3	0.0307282	0.860848	-31873.7	-31882.1	whr_qn	whr_qn
uc002cjj.3	9	4721	123	0.0135956	0.00151062	3	111	15947	15945.3	3.41192	0.332366	-31860.2	-31882.1	tg_qn+lnfi+whr_qn	lnfi+tg_qn+whr_qn
uc002cjj.3	9	4721	123	0.0135956	0.00151062	2	110	15947	15945.3	3.31118	0.19098	-31868.5	-31882.1	tg_qn+lnfi	lnfi+tg_qn
uc002cjj.3	9	4721	123	0.0135956	0.00151062	2	101	15946.6	15945.3	2.55284	0.279034	-31867.8	-31882.1	tg_qn+whr_qn	tg_qn+whr_qn
uc002cjj.3	9	4721	123	0.0135956	0.00151062	1	100	15946.5	15945.3	2.35768	0.124668	-31876	-31882.1	tg_qn	tg_qn
uc002cjj.3	9	4721	123	0.0135956	0.00151062	2	11	15945.4	15945.3	0.140452	0.932183	-31865.4	-31882.1	lnfi+whr_qn	lnfi+whr_qn
uc002cjj.3	9	4721	123	0.0135956	0.00151062	1	10	15945.4	15945.3	0.125853	0.722771	-31873.8	-31882.1	lnfi	lnfi
uc002cjj.3	9	4721	123	0.0135956	0.00151062	1	1	15945.3	15945.3	0.0307282	0.860848	-31873.7	-31882.1	whr_qn	whr_qn
uc010uuo.1	7	4721	119	0.0131658	0.00188083	3	111	14804.5	14803	2.88006	0.410489	-29575.1	-29597.6	tg_qn+lnfi+whr_qn	lnfi+tg_qn+whr_qn
uc010uuo.1	7	4721	119	0.0131658	0.00188083	2	110	14804.4	14803	2.71298	0.257563	-29583.4	-29597.6	tg_qn+lnfi	lnfi+tg_qn
uc010uuo.1	7	4721	119	0.0131658	0.00188083	2	101	14804.1	14803	2.25941	0.323129	-29582.9	-29597.6	tg_qn+whr_qn	tg_qn+whr_qn
uc010uuo.1	7	4721	119	0.0131658	0.00188083	1	100	14804	14803	1.99376	0.157949	-29591.1	-29597.6	tg_qn	tg_qn
uc010uuo.1	7	4721	119	0.0131658	0.00188083	2	11	14803.1	14803	0.13118	0.936515	-29580.8	-29597.6	lnfi+whr_qn	lnfi+whr_qn
uc010uuo.1	7	4721	119	0.0131658	0.00188083	1	10	14803.1	14803	0.0817711	0.774912	-29589.2	-29597.6	lnfi	lnfi
uc010uuo.1	7	4721	119	0.0131658	0.00188083	1	1	14803.1	14803	0.0710498	0.789814	-29589.2	-29597.6	whr_qn	whr_qn
uc002cjk.2	4	4721	91	0.0100769	0.00251922	3	111	13481.5	13479.5	4.04355	0.2568	-26929.2	-26950.5	tg_qn+lnfi+whr_qn	lnfi+tg_qn+whr_qn
uc002cjk.2	4	4721	91	0.0100769	0.00251922	2	110	13481.2	13479.5	3.4565	0.177595	-26937	-26950.5	tg_qn+lnfi	lnfi+tg_qn
uc002cjk.2	4	4721	91	0.0100769	0.00251922	2	101	13480.7	13479.5	2.51692	0.284091	-26936.1	-26950.5	tg_qn+whr_qn	tg_qn+whr_qn
uc002cjk.2	4	4721	91	0.0100769	0.00251922	1	100	13480.3	13479.5	1.63675	0.200772	-26943.7	-26950.5	tg_qn	tg_qn
uc002cjk.2	4	4721	91	0.0100769	0.00251922	2	11	13480	13479.5	0.938928	0.625337	-26934.5	-26950.5	lnfi+whr_qn	lnfi+whr_qn
uc002cjk.2	4	4721	91	0.0100769	0.00251922	1	10	13479.8	13479.5	0.624006	0.429563	-26942.7	-26950.5	lnfi	lnfi
uc002cjk.2	4	4721	91	0.0100769	0.00251922	1	1	13479.7	13479.5	0.486893	0.485316	-26942.5	-26950.5	whr_qn	whr_qn
uc002cjh.2	11	4721	125	0.0138082	0.00125529	3	111	16789.5	16787.7	3.60878	0.306925	-33545.1	-33566.8	tg_qn+lnfi+whr_qn	lnfi+tg_qn+whr_qn
uc002cjh.2	11	4721	125	0.0138082	0.00125529	2	110	16789.4	16787.7	3.44093	0.178983	-33553.4	-33566.8	tg_qn+lnfi	lnfi+tg_qn
uc002cjh.2	11	4721	125	0.0138082	0.00125529	2	101	16789	16787.7	2.79089	0.247722	-33552.7	-33566.8	tg_qn+whr_qn	tg_qn+whr_qn
uc002cjh.2	11	4721	125	0.0138082	0.00125529	1	100	16788.9	16787.7	2.50643	0.113382	-33560.9	-33566.8	tg_qn	tg_qn
uc002cjh.2	11	4721	125	0.0138082	0.00125529	2	11	16787.7	16787.7	0.145067	0.930034	-33550.1	-33566.8	lnfi+whr_qn	lnfi+whr_qn
uc002cjh.2	11	4721	125	0.0138082	0.00125529	1	10	16787.7	16787.7	0.106899	0.743702	-33558.5	-33566.8	lnfi	lnfi
uc002cjh.2	11	4721	125	0.0138082	0.00125529	1	1	16787.7	16787.7	0.0624955	0.802594	-33558.4	-33566.8	whr_qn	whr_qn
uc002cjl.1	4	4721	330	0.0369839	0.00924597	3	111	10454.6	10452	5.21703	0.156578	-20875.4	-20895.6	tg_qn+lnfi+whr_qn	lnfi+tg_qn+whr_qn
uc002cjl.1	4	4721	330	0.0369839	0.00924597	2	110	10454	10452	3.97868	0.136786	-20882.7	-20895.6	tg_qn+lnfi	lnfi+tg_qn
uc002cjl.1	4	4721	330	0.0369839	0.00924597	2	101	10453.3	10452	2.49584	0.287102	-20881.2	-20895.6	tg_qn+whr_qn	tg_qn+whr_qn
uc002cjl.1	4	4721	330	0.0369839	0.00924597	1	100	10452.9	10452	1.67809	0.195178	-20888.8	-20895.6	tg_qn	tg_qn
uc002cjl.1	4	4721	330	0.0369839	0.00924597	2	11	10453.3	10452	2.62896	0.268614	-20881.3	-20895.6	lnfi+whr_qn	lnfi+whr_qn
uc002cjl.1	4	4721	330	0.0369839	0.00924597	1	10	10452.5	10452	0.902687	0.342062	-20888	-20895.6	lnfi	lnfi
uc002cjl.1	4	4721	330	0.0369839	0.00924597	1	1	10452.7	10452	1.25643	0.262329	-20888.4	-20895.6	whr_qn	whr_qn
uc002cjm.1	4	4721	330	0.0369839	0.00924597	3	111	10454.6	10452	5.21703	0.156578	-20875.4	-20895.6	tg_qn+lnfi+whr_qn	lnfi+tg_qn+whr_qn
uc002cjm.1	4	4721	330	0.0369839	0.00924597	2	110	10454	10452	3.97868	0.136786	-20882.7	-20895.6	tg_qn+lnfi	lnfi+tg_qn
uc002cjm.1	4	4721	330	0.0369839	0.00924597	2	101	10453.3	10452	2.49584	0.287102	-20881.2	-20895.6	tg_qn+whr_qn	tg_qn+whr_qn
uc002cjm.1	4	4721	330	0.0369839	0.00924597	1	100	10452.9	10452	1.67809	0.195178	-20888.8	-20895.6	tg_qn	tg_qn
uc002cjm.1	4	4721	330	0.0369839	0.00924597	2	11	10453.3	10452	2.62896	0.268614	-20881.3	-20895.6	lnfi+whr_qn	lnfi+whr_qn
uc002cjm.1	4	4721	330	0.0369839	0.00924597	1	10	10452.5	10452	0.902687	0.342062	-20888	-20895.6	lnfi	lnfi
uc002cjm.1	4	4721	330	0.0369839	0.00924597	1	1	10452.7	10452	1.25643	0.262329	-20888.4	-20895.6	whr_qn	whr_qn
uc002cjn.1	3	4721	329	0.0368705	0.0122902	3	111	9146.94	9144.19	5.49837	0.138736	-18260	-18279.9	tg_qn+lnfi+whr_qn	lnfi+tg_qn+whr_qn
uc002cjn.1	3	4721	329	0.0368705	0.0122902	2	110	9146.24	9144.19	4.09493	0.129062	-18267.1	-18279.9	tg_qn+lnfi	lnfi+tg_qn
uc002cjn.1	3	4721	329	0.0368705	0.0122902	2	101	9145.6	9144.19	2.81377	0.244905	-18265.8	-18279.9	tg_qn+whr_qn	tg_qn+whr_qn
uc002cjn.1	3	4721	329	0.0368705	0.0122902	1	100	9145.12	9144.19	1.85529	0.173169	-18273.3	-18279.9	tg_qn	tg_qn
uc002cjn.1	3	4721	329	0.0368705	0.0122902	2	11	9145.56	9144.19	2.73876	0.254264	-18265.7	-18279.9	lnfi+whr_qn	lnfi+whr_qn
uc002cjn.1	3	4721	329	0.0368705	0.0122902	1	10	9144.59	9144.19	0.800396	0.370975	-18272.3	-18279.9	lnfi	lnfi
uc002cjn.1	3	4721	329	0.0368705	0.0122902	1	1	9144.92	9144.19	1.45392	0.2279	-18272.9	-18279.9	whr_qn	whr_qn
uc002cjo.1	3	4721	329	0.0368705	0.0122902	3	111	9146.94	9144.19	5.49837	0.138736	-18260	-18279.9	tg_qn+lnfi+whr_qn	lnfi+tg_qn+whr_qn
uc002cjo.1	3	4721	329	0.0368705	0.0122902	2	110	9146.24	9144.19	4.09493	0.129062	-18267.1	-18279.9	tg_qn+lnfi	lnfi+tg_qn
uc002cjo.1	3	4721	329	0.0368705	0.0122902	2	101	9145.6	9144.19	2.81377	0.244905	-18265.8	-18279.9	tg_qn+whr_qn	tg_qn+whr_qn
uc002cjo.1	3	4721	329	0.0368705	0.0122902	1	100	9145.12	9144.19	1.85529	0.173169	-18273.3	-18279.9	tg_qn	tg_qn
uc002cjo.1	3	4721	329	0.0368705	0.0122902	2	11	9145.56	9144.19	2.73876	0.254264	-18265.7	-18279.9	lnfi+whr_qn	lnfi+whr_qn
uc002cjo.1	3	4721	329	0.0368705	0.0122902	1	10	9144.59	9144.19	0.800396	0.370975	-18272.3	-18279.9	lnfi	lnfi
uc002cjo.1	3	4721	329	0.0368705	0.0122902	1	1	9144.92	9144.19	1.45392	0.2279	-18272.9	-18279.9	whr_qn	whr_qn
uc010uup.1	3	4721	329	0.0368705	0.0122902	3	111	9146.94	9144.19	5.49837	0.138736	-18260	-18279.9	tg_qn+lnfi+whr_qn	lnfi+tg_qn+whr_qn
uc010uup.1	3	4721	329	0.0368705	0.0122902	2	110	9146.24	9144.19	4.09493	0.129062	-18267.1	-18279.9	tg_qn+lnfi	lnfi+tg_qn
uc010uup.1	3	4721	329	0.0368705	0.0122902	2	101	9145.6	9144.19	2.81377	0.244905	-18265.8	-18279.9	tg_qn+whr_qn	tg_qn+whr_qn
uc010uup.1	3	4721	329	0.0368705	0.0122902	1	100	9145.12	9144.19	1.85529	0.173169	-18273.3	-18279.9	tg_qn	tg_qn
uc010uup.1	3	4721	329	0.0368705	0.0122902	2	11	9145.56	9144.19	2.73876	0.254264	-18265.7	-18279.9	lnfi+whr_qn	lnfi+whr_qn
uc010uup.1	3	4721	329	0.0368705	0.0122902	1	10	9144.59	9144.19	0.800396	0.370975	-18272.3	-18279.9	lnfi	lnfi
uc010uup.1	3	4721	329	0.0368705	0.0122902	1	1	9144.92	9144.19	1.45392	0.2279	-18272.9	-18279.9	whr_qn	whr_qn
uc010uuq.1	1	4721	2	0.000213402	0.000213402	3	111	15973.8	15973.6	0.399834	0.940277	-31913.8	-31938.8	tg_qn+lnfi+whr_qn	lnfi+tg_qn+whr_qn
uc010uuq.1	1	4721	2	0.000213402	0.000213402	2	110	15973.8	15973.6	0.349942	0.839481	-31922.2	-31938.8	tg_qn+lnfi	lnfi+tg_qn
uc010uuq.1	1	4721	2	0.000213402	0.000213402	2	101	15973.7	15973.6	0.131453	0.936387	-31922	-31938.8	tg_qn+whr_qn	tg_qn+whr_qn
uc010uuq.1	1	4721	2	0.000213402	0.000213402	1	100	15973.6	15973.6	0.044025	0.833807	-31930.4	-31938.8	tg_qn	tg_qn
uc010uuq.1	1	4721	2	0.000213402	0.000213402	2	11	15973.7	15973.6	0.222254	0.894825	-31922.1	-31938.8	lnfi+whr_qn	lnfi+whr_qn
uc010uuq.1	1	4721	2	0.000213402	0.000213402	1	10	15973.7	15973.6	0.191849	0.661382	-31930.5	-31938.8	lnfi	lnfi
uc010uuq.1	1	4721	2	0.000213402	0.000213402	1	1	15973.7	15973.6	0.0644771	0.799555	-31930.4	-31938.8	whr_qn	whr_qn
uc002cjp.2	17	4721	395	0.0435134	0.00255961	3	111	16587.7	16586.3	2.83558	0.417676	-33141.5	-33164.1	tg_qn+lnfi+whr_qn	lnfi+tg_qn+whr_qn
uc002cjp.2	17	4721	395	0.0435134	0.00255961	2	110	16587.6	16586.3	2.68946	0.260611	-33149.8	-33164.1	tg_qn+lnfi	lnfi+tg_qn
uc002cjp.2	17	4721	395	0.0435134	0.00255961	2	101	16586.7	16586.3	0.822031	0.662977	-33148	-33164.1	tg_qn+whr_qn	tg_qn+whr_qn
uc002cjp.2	17	4721	395	0.0435134	0.00255961	1	100	16586.5	16586.3	0.494454	0.481947	-33156.1	-33164.1	tg_qn	tg_qn
uc002cjp.2	17	4721	395	0.0435134	0.00255961	2	11	16586.9	16586.3	1.32529	0.515487	-33148.5	-33164.1	lnfi+whr_qn	lnfi+whr_qn
uc002cjp.2	17	4721	395	0.0435134	0.00255961	1	10	16586.9	16586.3	1.26589	0.260538	-33156.9	-33164.1	lnfi	lnfi
uc002cjp.2	17	4721	395	0.0435134	0.00255961	1	1	16586.4	16586.3	0.195242	0.658589	-33155.8	-33164.1	whr_qn	whr_qn
uc002cjq.2	24	4721	551	0.0610392	0.0025433	3	111	16606.1	16605.1	1.91375	0.590499	-33178.3	-33201.8	tg_qn+lnfi+whr_qn	lnfi+tg_qn+whr_qn
uc002cjq.2	24	4721	551	0.0610392	0.0025433	2	110	16606	16605.1	1.79946	0.406679	-33186.7	-33201.8	tg_qn+lnfi	lnfi+tg_qn
uc002cjq.2	24	4721	551	0.0610392	0.0025433	2	101	16605.3	16605.1	0.428782	0.807033	-33185.3	-33201.8	tg_qn+whr_qn	tg_qn+whr_qn
uc002cjq.2	24	4721	551	0.0610392	0.0025433	1	100	16605.2	16605.1	0.179231	0.672035	-33193.5	-33201.8	tg_qn	tg_qn
uc002cjq.2	24	4721	551	0.0610392	0.0025433	2	11	16605.7	16605.1	1.12947	0.568512	-33186	-33201.8	lnfi+whr_qn	lnfi+whr_qn
uc002cjq.2	24	4721	551	0.0610392	0.0025433	1	10	16605.7	16605.1	1.0715	0.300606	-33194.4	-33201.8	lnfi	lnfi
uc002cjq.2	24	4721	551	0.0610392	0.0025433	1	1	16605.2	16605.1	0.176846	0.674098	-33193.5	-33201.8	whr_qn	whr_qn
uc002cjr.2	24	4721	551	0.0610392	0.0025433	3	111	16606.1	16605.1	1.91375	0.590499	-33178.3	-33201.8	tg_qn+lnfi+whr_qn	lnfi+tg_qn+whr_qn
uc002cjr.2	24	4721	551	0.0610392	0.0025433	2	110	16606	16605.1	1.79946	0.406679	-33186.7	-33201.8	tg_qn+lnfi	lnfi+tg_qn
uc002cjr.2	24	4721	551	0.0610392	0.0025433	2	101	16605.3	16605.1	0.428782	0.807033	-33185.3	-33201.8	tg_qn+whr_qn	tg_qn+whr_qn
uc002cjr.2	24	4721	551	0.0610392	0.0025433	1	100	16605.2	16605.1	0.179231	0.672035	-33193.5	-33201.8	tg_qn	tg_qn
uc002cjr.2	24	4721	551	0.0610392	0.0025433	2	11	16605.7	16605.1	1.12947	0.568512	-33186	-33201.8	lnfi+whr_qn	lnfi+whr_qn
uc002cjr.2	24	4721	551	0.0610392	0.0025433	1	10	16605.7	16605.1	1.0715	0.300606	-33194.4	-33201.8	lnfi	lnfi
uc002cjr.2	24	4721	551	0.0610392	0.0025433	1	1	16605.2	16605.1	0.176846	0.674098	-33193.5	-33201.8	whr_qn	whr_qn
uc002cjs.2	24	4721	551	0.0610392	0.0025433	3	111	16606.1	16605.1	1.91375	0.590499	-33178.3	-33201.8	tg_qn+lnfi+whr_qn	lnfi+tg_qn+whr_qn
uc002cjs.2	24	4721	551	0.0610392	0.0025433	2	110	16606	16605.1	1.79946	0.406679	-33186.7	-33201.8	tg_qn+lnfi	lnfi+tg_qn
uc002cjs.2	24	4721	551	0.0610392	0.0025433	2	101	16605.3	16605.1	0.428782	0.807033	-33185.3	-33201.8	tg_qn+whr_qn	tg_qn+whr_qn
uc002cjs.2	24	4721	551	0.0610392	0.0025433	1	100	16605.2	16605.1	0.179231	0.672035	-33193.5	-33201.8	tg_qn	tg_qn
uc002cjs.2	24	4721	551	0.0610392	0.0025433	2	11	16605.7	16605.1	1.12947	0.568512	-33186	-33201.8	lnfi+whr_qn	lnfi+whr_qn
uc002cjs.2	24	4721	551	0.0610392	0.0025433	1	10	16605.7	16605.1	1.0715	0.300606	-33194.4	-33201.8	lnfi	lnfi
uc002cjs.2	24	4721	551	0.0610392	0.0025433	1	1	16605.2	16605.1	0.176846	0.674098	-33193.5	-33201.8	whr_qn	whr_qn
uc010brc.1	18	4721	443	0.0492894	0.0027383	3	111	15703.4	15703.1	0.435853	0.93274	-31372.9	-31397.8	tg_qn+lnfi+whr_qn	lnfi+tg_qn+whr_qn
uc010brc.1	18	4721	443	0.0492894	0.0027383	2	110	15703.3	15703.1	0.403239	0.817406	-31381.3	-31397.8	tg_qn+lnfi	lnfi+tg_qn
uc010brc.1	18	4721	443	0.0492894	0.0027383	2	101	15703.2	15703.1	0.157867	0.924102	-31381	-31397.8	tg_qn+whr_qn	tg_qn+whr_qn
uc010brc.1	18	4721	443	0.0492894	0.0027383	1	100	15703.2	15703.1	0.0972271	0.755183	-31389.4	-31397.8	tg_qn	tg_qn
uc010brc.1	18	4721	443	0.0492894	0.0027383	2	11	15703.2	15703.1	0.184109	0.912055	-31381.1	-31397.8	lnfi+whr_qn	lnfi+whr_qn
uc010brc.1	18	4721	443	0.0492894	0.0027383	1	10	15703.2	15703.1	0.166802	0.68297	-31389.5	-31397.8	lnfi	lnfi
uc010brc.1	18	4721	443	0.0492894	0.0027383	1	1	15703.2	15703.1	0.0373397	0.846775	-31389.4	-31397.8	whr_qn	whr_qn
uc010uur.1	17	4721	359	0.0397721	0.00233954	3	111	15700.5	15700	1.02839	0.794384	-31367.3	-31391.6	tg_qn+lnfi+whr_qn	lnfi+tg_qn+whr_qn
uc010uur.1	17	4721	359	0.0397721	0.00233954	2	110	15700.5	15700	0.921995	0.630654	-31375.6	-31391.6	tg_qn+lnfi	lnfi+tg_qn
uc010uur.1	17	4721	359	0.0397721	0.00233954	2	101	15700.3	15700	0.511028	0.774518	-31375.2	-31391.6	tg_qn+whr_qn	tg_qn+whr_qn
uc010uur.1	17	4721	359	0.0397721	0.00233954	1	100	15700.2	15700	0.332221	0.564354	-31383.5	-31391.6	tg_qn	tg_qn
uc010uur.1	17	4721	359	0.0397721	0.00233954	2	11	15700.2	15700	0.312787	0.855223	-31375	-31391.6	lnfi+whr_qn	lnfi+whr_qn
uc010uur.1	17	4721	359	0.0397721	0.00233954	1	10	15700.2	15700	0.25931	0.610595	-31383.4	-31391.6	lnfi	lnfi
uc010uur.1	17	4721	359	0.0397721	0.00233954	1	1	15700.1	15700	0.100739	0.750944	-31383.2	-31391.6	whr_qn	whr_qn
uc002cjv.1	53	4721	1220	0.137991	0.00260361	3	111	16578.1	16577.8	0.700308	0.873132	-33122.4	-33147.1	tg_qn+lnfi+whr_qn	lnfi+tg_qn+whr_qn
uc002cjv.1	53	4721	1220	0.137991	0.00260361	2	110	16578.1	16577.8	0.640727	0.725885	-33130.8	-33147.1	tg_qn+lnfi	lnfi+tg_qn
uc002cjv.1	53	4721	1220	0.137991	0.00260361	2	101	16578.1	16577.8	0.653503	0.721263	-33130.8	-33147.1	tg_qn+whr_qn	tg_qn+whr_qn
uc002cjv.1	53	4721	1220	0.137991	0.00260361	1	100	16578.1	16577.8	0.582467	0.445347	-33139.2	-33147.1	tg_qn	tg_qn
uc002cjv.1	53	4721	1220	0.137991	0.00260361	2	11	16577.8	16577.8	0.0530727	0.973813	-33130.2	-33147.1	lnfi+whr_qn	lnfi+whr_qn
uc002cjv.1	53	4721	1220	0.137991	0.00260361	1	10	16577.8	16577.8	0.0238926	0.877158	-33138.6	-33147.1	lnfi	lnfi
uc002cjv.1	53	4721	1220	0.137991	0.00260361	1	1	16577.8	16577.8	0.0255475	0.87301	-33138.6	-33147.1	whr_qn	whr_qn
uc002cjt.1	59	4721	1467	0.165041	0.00279731	3	111	16197.5	16197.2	0.519307	0.91463	-32361.1	-32386	tg_qn+lnfi+whr_qn	lnfi+tg_qn+whr_qn
uc002cjt.1	59	4721	1467	0.165041	0.00279731	2	110	16197.5	16197.2	0.50275	0.777731	-32369.5	-32386	tg_qn+lnfi	lnfi+tg_qn
uc002cjt.1	59	4721	1467	0.165041	0.00279731	2	101	16197.5	16197.2	0.49827	0.779475	-32369.5	-32386	tg_qn+whr_qn	tg_qn+whr_qn
uc002cjt.1	59	4721	1467	0.165041	0.00279731	1	100	16197.5	16197.2	0.48214	0.487455	-32378	-32386	tg_qn	tg_qn
uc002cjt.1	59	4721	1467	0.165041	0.00279731	2	11	16197.3	16197.2	0.127227	0.938368	-32369.2	-32386	lnfi+whr_qn	lnfi+whr_qn
uc002cjt.1	59	4721	1467	0.165041	0.00279731	1	10	16197.3	16197.2	0.110157	0.739966	-32377.6	-32386	lnfi	lnfi
uc002cjt.1	59	4721	1467	0.165041	0.00279731	1	1	16197.2	16197.2	0.0245786	0.875422	-32377.5	-32386	whr_qn	whr_qn
uc002cju.1	59	4721	1467	0.165041	0.00279731	3	111	16197.5	16197.2	0.519307	0.91463	-32361.1	-32386	tg_qn+lnfi+whr_qn	lnfi+tg_qn+whr_qn
uc002cju.1	59	4721	1467	0.165041	0.00279731	2	110	16197.5	16197.2	0.50275	0.777731	-32369.5	-32386	tg_qn+lnfi	lnfi+tg_qn
uc002cju.1	59	4721	1467	0.165041	0.00279731	2	101	16197.5	16197.2	0.49827	0.779475	-32369.5	-32386	tg_qn+whr_qn	tg_qn+whr_qn
uc002cju.1	59	4721	1467	0.165041	0.00279731	1	100	16197.5	16197.2	0.48214	0.487455	-32378	-32386	tg_qn	tg_qn
uc002cju.1	59	4721	1467	0.165041	0.00279731	2	11	16197.3	16197.2	0.127227	0.938368	-32369.2	-32386	lnfi+whr_qn	lnfi+whr_qn
uc002cju.1	59	4721	1467	0.165041	0.00279731	1	10	16197.3	16197.2	0.110157	0.739966	-32377.6	-32386	lnfi	lnfi
uc002cju.1	59	4721	1467	0.165041	0.00279731	1	1	16197.2	16197.2	0.0245786	0.875422	-32377.5	-32386	whr_qn	whr_qn
uc010brd.1	59	4721	1467	0.165041	0.00279731	3	111	16197.5	16197.2	0.519307	0.91463	-32361.1	-32386	tg_qn+lnfi+whr_qn	lnfi+tg_qn+whr_qn
uc010brd.1	59	4721	1467	0.165041	0.00279731	2	110	16197.5	16197.2	0.50275	0.777731	-32369.5	-32386	tg_qn+lnfi	lnfi+tg_qn
uc010brd.1	59	4721	1467	0.165041	0.00279731	2	101	16197.5	16197.2	0.49827	0.779475	-32369.5	-32386	tg_qn+whr_qn	tg_qn+whr_qn
uc010brd.1	59	4721	1467	0.165041	0.00279731	1	100	16197.5	16197.2	0.48214	0.487455	-32378	-32386	tg_qn	tg_qn
uc010brd.1	59	4721	1467	0.165041	0.00279731	2	11	16197.3	16197.2	0.127227	0.938368	-32369.2	-32386	lnfi+whr_qn	lnfi+whr_qn
uc010brd.1	59	4721	1467	0.165041	0.00279731	1	10	16197.3	16197.2	0.110157	0.739966	-32377.6	-32386	lnfi	lnfi
uc010brd.1	59	4721	1467	0.165041	0.00279731	1	1	16197.2	16197.2	0.0245786	0.875422	-32377.5	-32386	whr_qn	whr_qn
uc002cjw.1	55	4721	1253	0.141517	0.00257304	3	111	16479.7	16479.4	0.691218	0.875268	-32925.6	-32950.3	tg_qn+lnfi+whr_qn	lnfi+tg_qn+whr_qn
uc002cjw.1	55	4721	1253	0.141517	0.00257304	2	110	16479.7	16479.4	0.634712	0.728071	-32934	-32950.3	tg_qn+lnfi	lnfi+tg_qn
uc002cjw.1	55	4721	1253	0.141517	0.00257304	2	101	16479.7	16479.4	0.585648	0.746153	-32934	-32950.3	tg_qn+whr_qn	tg_qn+whr_qn
uc002cjw.1	55	4721	1253	0.141517	0.00257304	1	100	16479.6	16479.4	0.509845	0.475206	-32942.3	-32950.3	tg_qn	tg_qn
uc002cjw.1	55	4721	1253	0.141517	0.00257304	2	11	16479.4	16479.4	0.0450796	0.977712	-32933.4	-32950.3	lnfi+whr_qn	lnfi+whr_qn
uc002cjw.1	55	4721	1253	0.141517	0.00257304	1	10	16479.4	16479.4	0.0181136	0.892939	-32941.8	-32950.3	lnfi	lnfi
uc002cjw.1	55	4721	1253	0.141517	0.00257304	1	1	16479.4	16479.4	0.0289083	0.864991	-32941.9	-32950.3	whr_qn	whr_qn
uc002cjx.1	55	4721	1253	0.141517	0.00257304	3	111	16479.7	16479.4	0.691218	0.875268	-32925.6	-32950.3	tg_qn+lnfi+whr_qn	lnfi+tg_qn+whr_qn
uc002cjx.1	55	4721	1253	0.141517	0.00257304	2	110	16479.7	16479.4	0.634712	0.728071	-32934	-32950.3	tg_qn+lnfi	lnfi+tg_qn
uc002cjx.1	55	4721	1253	0.141517	0.00257304	2	101	16479.7	16479.4	0.585648	0.746153	-32934	-32950.3	tg_qn+whr_qn	tg_qn+whr_qn
uc002cjx.1	55	4721	1253	0.141517	0.00257304	1	100	16479.6	16479.4	0.509845	0.475206	-32942.3	-32950.3	tg_qn	tg_qn
uc002cjx.1	55	4721	1253	0.141517	0.00257304	2	11	16479.4	16479.4	0.0450796	0.977712	-32933.4	-32950.3	lnfi+whr_qn	lnfi+whr_qn
uc002cjx.1	55	4721	1253	0.141517	0.00257304	1	10	16479.4	16479.4	0.0181136	0.892939	-32941.8	-32950.3	lnfi	lnfi
uc002cjx.1	55	4721	1253	0.141517	0.00257304	1	1	16479.4	16479.4	0.0289083	0.864991	-32941.9	-32950.3	whr_qn	whr_qn
uc002cjy.1	25	4721	333	0.0363951	0.0014558	3	111	17003	17002.5	1.04878	0.789451	-33972.2	-33996.5	tg_qn+lnfi+whr_qn	lnfi+tg_qn+whr_qn
uc002cjy.1	25	4721	333	0.0363951	0.0014558	2	110	17002.9	17002.5	0.913657	0.633289	-33980.5	-33996.5	tg_qn+lnfi	lnfi+tg_qn
uc002cjy.1	25	4721	333	0.0363951	0.0014558	2	101	17002.5	17002.5	0.140101	0.932347	-33979.7	-33996.5	tg_qn+whr_qn	tg_qn+whr_qn
uc002cjy.1	25	4721	333	0.0363951	0.0014558	1	100	17002.5	17002.5	0.0767411	0.781763	-33988.1	-33996.5	tg_qn	tg_qn
uc002cjy.1	25	4721	333	0.0363951	0.0014558	2	11	17003	17002.5	1.03514	0.595968	-33980.6	-33996.5	lnfi+whr_qn	lnfi+whr_qn
uc002cjy.1	25	4721	333	0.0363951	0.0014558	1	10	17002.9	17002.5	0.893485	0.344535	-33988.9	-33996.5	lnfi	lnfi
uc002cjy.1	25	4721	333	0.0363951	0.0014558	1	1	17002.5	17002.5	0.0437551	0.83431	-33988.1	-33996.5	whr_qn	whr_qn
uc002cjz.1	131	4721	3788	0.413899	0.00315953	3	111	15029.6	15029.2	0.611417	0.893814	-30025.3	-30050	tg_qn+lnfi+whr_qn	lnfi+tg_qn+whr_qn
uc002cjz.1	131	4721	3788	0.413899	0.00315953	2	110	15029.5	15029.2	0.503364	0.777492	-30033.6	-30050	tg_qn+lnfi	lnfi+tg_qn
uc002cjz.1	131	4721	3788	0.413899	0.00315953	2	101	15029.5	15029.2	0.588103	0.745238	-30033.7	-30050	tg_qn+whr_qn	tg_qn+whr_qn
uc002cjz.1	131	4721	3788	0.413899	0.00315953	1	100	15029.5	15029.2	0.468165	0.493832	-30042	-30050	tg_qn	tg_qn
uc002cjz.1	131	4721	3788	0.413899	0.00315953	2	11	15029.4	15029.2	0.317152	0.853358	-30033.4	-30050	lnfi+whr_qn	lnfi+whr_qn
uc002cjz.1	131	4721	3788	0.413899	0.00315953	1	10	15029.3	15029.2	0.163176	0.686249	-30041.7	-30050	lnfi	lnfi
uc002cjz.1	131	4721	3788	0.413899	0.00315953	1	1	15029.4	15029.2	0.209025	0.647533	-30041.8	-30050	whr_qn	whr_qn
uc002cka.2	25	4721	909	0.0984634	0.00393853	3	111	15211.5	15210.4	2.14249	0.543365	-30389.1	-30412.3	tg_qn+lnfi+whr_qn	lnfi+tg_qn+whr_qn
uc002cka.2	25	4721	909	0.0984634	0.00393853	2	110	15211.4	15210.4	2.0592	0.35715	-30397.4	-30412.3	tg_qn+lnfi	lnfi+tg_qn
uc002cka.2	25	4721	909	0.0984634	0.00393853	2	101	15210.4	15210.4	0.0355125	0.9824	-30395.4	-30412.3	tg_qn+whr_qn	tg_qn+whr_qn
uc002cka.2	25	4721	909	0.0984634	0.00393853	1	100	15210.4	15210.4	0.0216142	0.883118	-30403.9	-30412.3	tg_qn	tg_qn
uc002cka.2	25	4721	909	0.0984634	0.00393853	2	11	15211.3	15210.4	1.78011	0.410632	-30397.2	-30412.3	lnfi+whr_qn	lnfi+whr_qn
uc002cka.2	25	4721	909	0.0984634	0.00393853	1	10	15211.2	15210.4	1.65032	0.198915	-30405.5	-30412.3	lnfi	lnfi
uc002cka.2	25	4721	909	0.0984634	0.00393853	1	1	15210.4	15210.4	0.0179695	0.893363	-30403.9	-30412.3	whr_qn	whr_qn
uc002ckb.2	28	4721	1128	0.122642	0.00438007	3	111	14693.7	14692.9	1.75582	0.624595	-29353.7	-29377.3	tg_qn+lnfi+whr_qn	lnfi+tg_qn+whr_qn
uc002ckb.2	28	4721	1128	0.122642	0.00438007	2	110	14693.7	14692.9	1.74233	0.418465	-29362.1	-29377.3	tg_qn+lnfi	lnfi+tg_qn
uc002ckb.2	28	4721	1128	0.122642	0.00438007	2	101	14693.1	14692.9	0.462954	0.793361	-29360.8	-29377.3	tg_qn+whr_qn	tg_qn+whr_qn
uc002ckb.2	28	4721	1128	0.122642	0.00438007	1	100	14693.1	14692.9	0.40479	0.524626	-29369.2	-29377.3	tg_qn	tg_qn
uc002ckb.2	28	4721	1128	0.122642	0.00438007	2	11	14693.2	14692.9	0.73128	0.693752	-29361.1	-29377.3	lnfi+whr_qn	lnfi+whr_qn
uc002ckb.2	28	4721	1128	0.122642	0.00438007	1	10	14693.2	14692.9	0.71984	0.396196	-29369.5	-29377.3	lnfi	lnfi
uc002ckb.2	28	4721	1128	0.122642	0.00438007	1	1	14692.9	14692.9	0.020454	0.886276	-29368.8	-29377.3	whr_qn	whr_qn
uc002ckc.2	28	4721	1128	0.122642	0.00438007	3	111	14693.7	14692.9	1.75582	0.624595	-29353.7	-29377.3	tg_qn+lnfi+whr_qn	lnfi+tg_qn+whr_qn
uc002ckc.2	28	4721	1128	0.122642	0.00438007	2	110	14693.7	14692.9	1.74233	0.418465	-29362.1	-29377.3	tg_qn+lnfi	lnfi+tg_qn
uc002ckc.2	28	4721	1128	0.122642	0.00438007	2	101	14693.1	14692.9	0.462954	0.793361	-29360.8	-29377.3	tg_qn+whr_qn	tg_qn+whr_qn
uc002ckc.2	28	4721	1128	0.122642	0.00438007	1	100	14693.1	14692.9	0.40479	0.524626	-29369.2	-29377.3	tg_qn	tg_qn
uc002ckc.2	28	4721	1128	0.122642	0.00438007	2	11	14693.2	14692.9	0.73128	0.693752	-29361.1	-29377.3	lnfi+whr_qn	lnfi+whr_qn
uc002ckc.2	28	4721	1128	0.122642	0.00438007	1	10	14693.2	14692.9	0.71984	0.396196	-29369.5	-29377.3	lnfi	lnfi
uc002ckc.2	28	4721	1128	0.122642	0.00438007	1	1	14692.9	14692.9	0.020454	0.886276	-29368.8	-29377.3	whr_qn	whr_qn
uc002ckd.2	28	4721	1128	0.122642	0.00438007	3	111	14693.7	14692.9	1.75582	0.624595	-29353.7	-29377.3	tg_qn+lnfi+whr_qn	lnfi+tg_qn+whr_qn
uc002ckd.2	28	4721	1128	0.122642	0.00438007	2	110	14693.7	14692.9	1.74233	0.418465	-29362.1	-29377.3	tg_qn+lnfi	lnfi+tg_qn
uc002ckd.2	28	4721	1128	0.122642	0.00438007	2	101	14693.1	14692.9	0.462954	0.793361	-29360.8	-29377.3	tg_qn+whr_qn	tg_qn+whr_qn
uc002ckd.2	28	4721	1128	0.122642	0.00438007	1	100	14693.1	14692.9	0.40479	0.524626	-29369.2	-29377.3	tg_qn	tg_qn
uc002ckd.2	28	4721	1128	0.122642	0.00438007	2	11	14693.2	14692.9	0.73128	0.693752	-29361.1	-29377.3	lnfi+whr_qn	lnfi+whr_qn
uc002ckd.2	28	4721	1128	0.122642	0.00438007	1	10	14693.2	14692.9	0.71984	0.396196	-29369.5	-29377.3	lnfi	lnfi
uc002ckd.2	28	4721	1128	0.122642	0.00438007	1	1	14692.9	14692.9	0.020454	0.886276	-29368.8	-29377.3	whr_qn	whr_qn
uc010uus.1	41	4721	3053	0.33127	0.00807974	3	111	13258.2	13256.4	3.48694	0.32246	-26482.5	-26504.4	tg_qn+lnfi+whr_qn	lnfi+tg_qn+whr_qn
uc010uus.1	41	4721	3053	0.33127	0.00807974	2	110	13257.2	13256.4	1.6319	0.442219	-26489.1	-26504.4	tg_qn+lnfi	lnfi+tg_qn
uc010uus.1	41	4721	3053	0.33127	0.00807974	2	101	13257.2	13256.4	1.53108	0.465082	-26489	-26504.4	tg_qn+whr_qn	tg_qn+whr_qn
uc010uus.1	41	4721	3053	0.33127	0.00807974	1	100	13256.5	13256.4	0.120202	0.728815	-26496	-26504.4	tg_qn	tg_qn
uc010uus.1	41	4721	3053	0.33127	0.00807974	2	11	13258.2	13256.4	3.47391	0.176056	-26490.9	-26504.4	lnfi+whr_qn	lnfi+whr_qn
uc010uus.1	41	4721	3053	0.33127	0.00807974	1	10	13257.2	13256.4	1.59874	0.206082	-26497.5	-26504.4	lnfi	lnfi
uc010uus.1	41	4721	3053	0.33127	0.00807974	1	1	13257	13256.4	1.23549	0.266341	-26497.1	-26504.4	whr_qn	whr_qn
uc010bre.1	48	4721	3373	0.365255	0.00760949	3	111	13448.6	13447.1	3.06104	0.38231	-26863.5	-26885.8	tg_qn+lnfi+whr_qn	lnfi+tg_qn+whr_qn
uc010bre.1	48	4721	3373	0.365255	0.00760949	2	110	13448.1	13447.1	1.93291	0.380429	-26870.8	-26885.8	tg_qn+lnfi	lnfi+tg_qn
uc010bre.1	48	4721	3373	0.365255	0.00760949	2	101	13447.6	13447.1	0.955689	0.620119	-26869.8	-26885.8	tg_qn+whr_qn	tg_qn+whr_qn
uc010bre.1	48	4721	3373	0.365255	0.00760949	1	100	13447.2	13447.1	0.183571	0.668322	-26877.5	-26885.8	tg_qn	tg_qn
uc010bre.1	48	4721	3373	0.365255	0.00760949	2	11	13448.6	13447.1	3.04838	0.217798	-26871.9	-26885.8	lnfi+whr_qn	lnfi+whr_qn
uc010bre.1	48	4721	3373	0.365255	0.00760949	1	10	13448.1	13447.1	1.91163	0.166782	-26879.2	-26885.8	lnfi	lnfi
uc010bre.1	48	4721	3373	0.365255	0.00760949	1	1	13447.4	13447.1	0.628033	0.428078	-26877.9	-26885.8	whr_qn	whr_qn
uc002cke.3	103	4721	5387	0.587986	0.0057086	3	111	14748	14746	3.94925	0.266997	-29462.1	-29483.5	tg_qn+lnfi+whr_qn	lnfi+tg_qn+whr_qn
uc002cke.3	103	4721	5387	0.587986	0.0057086	2	110	14747.8	14746	3.61938	0.163705	-29470.2	-29483.5	tg_qn+lnfi	lnfi+tg_qn
uc002cke.3	103	4721	5387	0.587986	0.0057086	2	101	14746.5	14746	1.06697	0.586557	-29467.7	-29483.5	tg_qn+whr_qn	tg_qn+whr_qn
uc002cke.3	103	4721	5387	0.587986	0.0057086	1	100	14746.5	14746	0.935642	0.333401	-29476	-29483.5	tg_qn	tg_qn
uc002cke.3	103	4721	5387	0.587986	0.0057086	2	11	14747.9	14746	3.80499	0.149196	-29470.4	-29483.5	lnfi+whr_qn	lnfi+whr_qn
uc002cke.3	103	4721	5387	0.587986	0.0057086	1	10	14747.7	14746	3.51723	0.060734	-29478.6	-29483.5	lnfi	lnfi
uc002cke.3	103	4721	5387	0.587986	0.0057086	1	1	14746	14746	0.0445843	0.83277	-29475.1	-29483.5	whr_qn	whr_qn
uc002ckf.3	103	4721	5387	0.587986	0.0057086	3	111	14748	14746	3.94925	0.266997	-29462.1	-29483.5	tg_qn+lnfi+whr_qn	lnfi+tg_qn+whr_qn
uc002ckf.3	103	4721	5387	0.587986	0.0057086	2	110	14747.8	14746	3.61938	0.163705	-29470.2	-29483.5	tg_qn+lnfi	lnfi+tg_qn
uc002ckf.3	103	4721	5387	0.587986	0.0057086	2	101	14746.5	14746	1.06697	0.586557	-29467.7	-29483.5	tg_qn+whr_qn	tg_qn+whr_qn
uc002ckf.3	103	4721	5387	0.587986	0.0057086	1	100	14746.5	14746	0.935642	0.333401	-29476	-29483.5	tg_qn	tg_qn
uc002ckf.3	103	4721	5387	0.587986	0.0057086	2	11	14747.9	14746	3.80499	0.149196	-29470.4	-29483.5	lnfi+whr_qn	lnfi+whr_qn
uc002ckf.3	103	4721	5387	0.587986	0.0057086	1	10	14747.7	14746	3.51723	0.060734	-29478.6	-29483.5	lnfi	lnfi
uc002ckf.3	103	4721	5387	0.587986	0.0057086	1	1	14746	14746	0.0445843	0.83277	-29475.1	-29483.5	whr_qn	whr_qn
uc010brf.2	103	4721	5387	0.587986	0.0057086	3	111	14748	14746	3.94925	0.266997	-29462.1	-29483.5	tg_qn+lnfi+whr_qn	lnfi+tg_qn+whr_qn
uc010brf.2	103	4721	5387	0.587986	0.0057086	2	110	14747.8	14746	3.61938	0.163705	-29470.2	-29483.5	tg_qn+lnfi	lnfi+tg_qn
uc010brf.2	103	4721	5387	0.587986	0.0057086	2	101	14746.5	14746	1.06697	0.586557	-29467.7	-29483.5	tg_qn+whr_qn	tg_qn+whr_qn
uc010brf.2	103	4721	5387	0.587986	0.0057086	1	100	14746.5	14746	0.935642	0.333401	-29476	-29483.5	tg_qn	tg_qn
uc010brf.2	103	4721	5387	0.587986	0.0057086	2	11	14747.9	14746	3.80499	0.149196	-29470.4	-29483.5	lnfi+whr_qn	lnfi+whr_qn
uc010brf.2	103	4721	5387	0.587986	0.0057086	1	10	14747.7	14746	3.51723	0.060734	-29478.6	-29483.5	lnfi	lnfi
uc010brf.2	103	4721	5387	0.587986	0.0057086	1	1	14746	14746	0.0445843	0.83277	-29475.1	-29483.5	whr_qn	whr_qn
uc002ckg.3	103	4721	5387	0.587986	0.0057086	3	111	14748	14746	3.94925	0.266997	-29462.1	-29483.5	tg_qn+lnfi+whr_qn	lnfi+tg_qn+whr_qn
uc002ckg.3	103	4721	5387	0.587986	0.0057086	2	110	14747.8	14746	3.61938	0.163705	-29470.2	-29483.5	tg_qn+lnfi	lnfi+tg_qn
uc002ckg.3	103	4721	5387	0.587986	0.0057086	2	101	14746.5	14746	1.06697	0.586557	-29467.7	-29483.5	tg_qn+whr_qn	tg_qn+whr_qn
uc002ckg.3	103	4721	5387	0.587986	0.0057086	1	100	14746.5	14746	0.935642	0.333401	-29476	-29483.5	tg_qn	tg_qn
uc002ckg.3	103	4721	5387	0.587986	0.0057086	2	11	14747.9	14746	3.80499	0.149196	-29470.4	-29483.5	lnfi+whr_qn	lnfi+whr_qn
uc002ckg.3	103	4721	5387	0.587986	0.0057086	1	10	14747.7	14746	3.51723	0.060734	-29478.6	-29483.5	lnfi	lnfi
uc002ckg.3	103	4721	5387	0.587986	0.0057086	1	1	14746	14746	0.0445843	0.83277	-29475.1	-29483.5	whr_qn	whr_qn
uc002ckh.3	29	4721	1115	0.121337	0.00418402	3	111	12836.5	12835.5	2.06264	0.559509	-25639.3	-25662.6	tg_qn+lnfi+whr_qn	lnfi+tg_qn+whr_qn
uc002ckh.3	29	4721	1115	0.121337	0.00418402	2	110	12836.4	12835.5	1.72003	0.423155	-25647.4	-25662.6	tg_qn+lnfi	lnfi+tg_qn
uc002ckh.3	29	4721	1115	0.121337	0.00418402	2	101	12835.6	12835.5	0.251391	0.881883	-25645.9	-25662.6	tg_qn+whr_qn	tg_qn+whr_qn
uc002ckh.3	29	4721	1115	0.121337	0.00418402	1	100	12835.6	12835.5	0.0787385	0.779014	-25654.2	-25662.6	tg_qn	tg_qn
uc002ckh.3	29	4721	1115	0.121337	0.00418402	2	11	12836.5	12835.5	2.0319	0.362059	-25647.7	-25662.6	lnfi+whr_qn	lnfi+whr_qn
uc002ckh.3	29	4721	1115	0.121337	0.00418402	1	10	12836.3	12835.5	1.66268	0.197242	-25655.8	-25662.6	lnfi	lnfi
uc002ckh.3	29	4721	1115	0.121337	0.00418402	1	1	12835.6	12835.5	0.133831	0.714493	-25654.2	-25662.6	whr_qn	whr_qn
uc010uut.1	45	4721	2000	0.227312	0.00505138	3	111	13008.8	13007.2	3.19995	0.361812	-25983.7	-26005.9	tg_qn+lnfi+whr_qn	lnfi+tg_qn+whr_qn
uc010uut.1	45	4721	2000	0.227312	0.00505138	2	110	13008.5	13007.2	2.64773	0.266105	-25991.7	-26005.9	tg_qn+lnfi	lnfi+tg_qn
uc010uut.1	45	4721	2000	0.227312	0.00505138	2	101	13008.6	13007.2	2.86619	0.23857	-25991.9	-26005.9	tg_qn+whr_qn	tg_qn+whr_qn
uc010uut.1	45	4721	2000	0.227312	0.00505138	1	100	13008.3	13007.2	2.18537	0.139328	-25999.7	-26005.9	tg_qn	tg_qn
uc010uut.1	45	4721	2000	0.227312	0.00505138	2	11	13008.3	13007.2	2.13139	0.344489	-25991.1	-26005.9	lnfi+whr_qn	lnfi+whr_qn
uc010uut.1	45	4721	2000	0.227312	0.00505138	1	10	13007.9	13007.2	1.37262	0.241362	-25998.8	-26005.9	lnfi	lnfi
uc010uut.1	45	4721	2000	0.227312	0.00505138	1	1	13007.8	13007.2	1.14879	0.283802	-25998.6	-26005.9	whr_qn	whr_qn
uc010brg.2	56	4721	445	0.0498499	0.000890177	3	111	16506.9	16505.5	2.81647	0.420796	-32980	-33002.6	tg_qn+lnfi+whr_qn	lnfi+tg_qn+whr_qn
uc010brg.2	56	4721	445	0.0498499	0.000890177	2	110	16506.6	16505.5	2.17145	0.337656	-32987.9	-33002.6	tg_qn+lnfi	lnfi+tg_qn
uc010brg.2	56	4721	445	0.0498499	0.000890177	2	101	16506.8	16505.5	2.6388	0.267295	-32988.3	-33002.6	tg_qn+whr_qn	tg_qn+whr_qn
uc010brg.2	56	4721	445	0.0498499	0.000890177	1	100	16506.5	16505.5	1.88845	0.169377	-32996	-33002.6	tg_qn	tg_qn
uc010brg.2	56	4721	445	0.0498499	0.000890177	2	11	16505.7	16505.5	0.392317	0.821882	-32986.1	-33002.6	lnfi+whr_qn	lnfi+whr_qn
uc010brg.2	56	4721	445	0.0498499	0.000890177	1	10	16505.5	16505.5	0.00413796	0.94871	-32994.1	-33002.6	lnfi	lnfi
uc010brg.2	56	4721	445	0.0498499	0.000890177	1	1	16505.7	16505.5	0.373222	0.541253	-32994.5	-33002.6	whr_qn	whr_qn
uc002ckl.1	76	4721	6463	0.707673	0.00931149	3	111	12309.7	12308.5	2.46584	0.481497	-24585.6	-24608.5	tg_qn+lnfi+whr_qn	lnfi+tg_qn+whr_qn
uc002ckl.1	76	4721	6463	0.707673	0.00931149	2	110	12309.3	12308.5	1.62347	0.444086	-24593.2	-24608.5	tg_qn+lnfi	lnfi+tg_qn
uc002ckl.1	76	4721	6463	0.707673	0.00931149	2	101	12309.2	12308.5	1.34069	0.511532	-24592.9	-24608.5	tg_qn+whr_qn	tg_qn+whr_qn
uc002ckl.1	76	4721	6463	0.707673	0.00931149	1	100	12308.6	12308.5	0.205005	0.650711	-24600.3	-24608.5	tg_qn	tg_qn
uc002ckl.1	76	4721	6463	0.707673	0.00931149	2	11	12309.7	12308.5	2.43432	0.29607	-24594	-24608.5	lnfi+whr_qn	lnfi+whr_qn
uc002ckl.1	76	4721	6463	0.707673	0.00931149	1	10	12309.3	12308.5	1.60895	0.204639	-24601.7	-24608.5	lnfi	lnfi
uc002ckl.1	76	4721	6463	0.707673	0.00931149	1	1	12309.1	12308.5	1.268	0.260143	-24601.3	-24608.5	whr_qn	whr_qn
uc002ckj.2	499	4721	31376	3.46638	0.00694665	3	111	14490.6	14489.2	2.72733	0.435603	-28947.3	-28969.9	tg_qn+lnfi+whr_qn	lnfi+tg_qn+whr_qn
uc002ckj.2	499	4721	31376	3.46638	0.00694665	2	110	14490.3	14489.2	2.21065	0.331104	-28955.2	-28969.9	tg_qn+lnfi	lnfi+tg_qn
uc002ckj.2	499	4721	31376	3.46638	0.00694665	2	101	14489.7	14489.2	0.99168	0.609059	-28954	-28969.9	tg_qn+whr_qn	tg_qn+whr_qn
uc002ckj.2	499	4721	31376	3.46638	0.00694665	1	100	14489.3	14489.2	0.192664	0.660708	-28961.7	-28969.9	tg_qn	tg_qn
uc002ckj.2	499	4721	31376	3.46638	0.00694665	2	11	14490.1	14489.2	1.77976	0.410705	-28954.8	-28969.9	lnfi+whr_qn	lnfi+whr_qn
uc002ckj.2	499	4721	31376	3.46638	0.00694665	1	10	14489.9	14489.2	1.40215	0.236364	-28962.9	-28969.9	lnfi	lnfi
uc002ckj.2	499	4721	31376	3.46638	0.00694665	1	1	14489.5	14489.2	0.661816	0.41592	-28962.1	-28969.9	whr_qn	whr_qn
uc010brh.2	499	4721	31376	3.46638	0.00694665	3	111	14490.6	14489.2	2.72733	0.435603	-28947.3	-28969.9	tg_qn+lnfi+whr_qn	lnfi+tg_qn+whr_qn
uc010brh.2	499	4721	31376	3.46638	0.00694665	2	110	14490.3	14489.2	2.21065	0.331104	-28955.2	-28969.9	tg_qn+lnfi	lnfi+tg_qn
uc010brh.2	499	4721	31376	3.46638	0.00694665	2	101	14489.7	14489.2	0.99168	0.609059	-28954	-28969.9	tg_qn+whr_qn	tg_qn+whr_qn
uc010brh.2	499	4721	31376	3.46638	0.00694665	1	100	14489.3	14489.2	0.192664	0.660708	-28961.7	-28969.9	tg_qn	tg_qn
uc010brh.2	499	4721	31376	3.46638	0.00694665	2	11	14490.1	14489.2	1.77976	0.410705	-28954.8	-28969.9	lnfi+whr_qn	lnfi+whr_qn
uc010brh.2	499	4721	31376	3.46638	0.00694665	1	10	14489.9	14489.2	1.40215	0.236364	-28962.9	-28969.9	lnfi	lnfi
uc010brh.2	499	4721	31376	3.46638	0.00694665	1	1	14489.5	14489.2	0.661816	0.41592	-28962.1	-28969.9	whr_qn	whr_qn
uc010bri.2	499	4721	31376	3.46638	0.00694665	3	111	14490.6	14489.2	2.72733	0.435603	-28947.3	-28969.9	tg_qn+lnfi+whr_qn	lnfi+tg_qn+whr_qn
uc010bri.2	499	4721	31376	3.46638	0.00694665	2	110	14490.3	14489.2	2.21065	0.331104	-28955.2	-28969.9	tg_qn+lnfi	lnfi+tg_qn
uc010bri.2	499	4721	31376	3.46638	0.00694665	2	101	14489.7	14489.2	0.99168	0.609059	-28954	-28969.9	tg_qn+whr_qn	tg_qn+whr_qn
uc010bri.2	499	4721	31376	3.46638	0.00694665	1	100	14489.3	14489.2	0.192664	0.660708	-28961.7	-28969.9	tg_qn	tg_qn
uc010bri.2	499	4721	31376	3.46638	0.00694665	2	11	14490.1	14489.2	1.77976	0.410705	-28954.8	-28969.9	lnfi+whr_qn	lnfi+whr_qn
uc010bri.2	499	4721	31376	3.46638	0.00694665	1	10	14489.9	14489.2	1.40215	0.236364	-28962.9	-28969.9	lnfi	lnfi
uc010bri.2	499	4721	31376	3.46638	0.00694665	1	1	14489.5	14489.2	0.661816	0.41592	-28962.1	-28969.9	whr_qn	whr_qn
uc010uuu.1	379	4721	30512	3.36965	0.00889091	3	111	13284.2	13283.1	2.31869	0.508949	-26534.6	-26557.6	tg_qn+lnfi+whr_qn	lnfi+tg_qn+whr_qn
uc010uuu.1	379	4721	30512	3.36965	0.00889091	2	110	13284	13283.1	1.94351	0.378419	-26542.7	-26557.6	tg_qn+lnfi	lnfi+tg_qn
uc010uuu.1	379	4721	30512	3.36965	0.00889091	2	101	13283.4	13283.1	0.701073	0.70431	-26541.4	-26557.6	tg_qn+whr_qn	tg_qn+whr_qn
uc010uuu.1	379	4721	30512	3.36965	0.00889091	1	100	13283.1	13283.1	0.0904603	0.763593	-26549.3	-26557.6	tg_qn	tg_qn
uc010uuu.1	379	4721	30512	3.36965	0.00889091	2	11	13283.9	13283.1	1.66943	0.433998	-26542.4	-26557.6	lnfi+whr_qn	lnfi+whr_qn
uc010uuu.1	379	4721	30512	3.36965	0.00889091	1	10	13283.7	13283.1	1.39222	0.238031	-26550.6	-26557.6	lnfi	lnfi
uc010uuu.1	379	4721	30512	3.36965	0.00889091	1	1	13283.3	13283.1	0.529135	0.466971	-26549.7	-26557.6	whr_qn	whr_qn
uc010uuv.1	378	4721	30506	3.36896	0.0089126	3	111	13272.2	13271	2.32695	0.507378	-26510.5	-26533.6	tg_qn+lnfi+whr_qn	lnfi+tg_qn+whr_qn
uc010uuv.1	378	4721	30506	3.36896	0.0089126	2	110	13272	13271	1.94988	0.377215	-26518.6	-26533.6	tg_qn+lnfi	lnfi+tg_qn
uc010uuv.1	378	4721	30506	3.36896	0.0089126	2	101	13271.4	13271	0.702605	0.703771	-26517.4	-26533.6	tg_qn+whr_qn	tg_qn+whr_qn
uc010uuv.1	378	4721	30506	3.36896	0.0089126	1	100	13271.1	13271	0.0889215	0.765553	-26525.2	-26533.6	tg_qn	tg_qn
uc010uuv.1	378	4721	30506	3.36896	0.0089126	2	11	13271.9	13271	1.68006	0.431697	-26518.3	-26533.6	lnfi+whr_qn	lnfi+whr_qn
uc010uuv.1	378	4721	30506	3.36896	0.0089126	1	10	13271.7	13271	1.40108	0.236543	-26526.5	-26533.6	lnfi	lnfi
uc010uuv.1	378	4721	30506	3.36896	0.0089126	1	1	13271.3	13271	0.532675	0.465484	-26525.6	-26533.6	whr_qn	whr_qn
uc002ckm.1	16	4721	864	0.0970391	0.00606495	3	111	13520.4	13519.7	1.47117	0.68894	-27006.9	-27030.8	tg_qn+lnfi+whr_qn	lnfi+tg_qn+whr_qn
uc002ckm.1	16	4721	864	0.0970391	0.00606495	2	110	13520.4	13519.7	1.41889	0.491918	-27015.3	-27030.8	tg_qn+lnfi	lnfi+tg_qn
uc002ckm.1	16	4721	864	0.0970391	0.00606495	2	101	13520.3	13519.7	1.35907	0.506854	-27015.3	-27030.8	tg_qn+whr_qn	tg_qn+whr_qn
uc002ckm.1	16	4721	864	0.0970391	0.00606495	1	100	13520.3	13519.7	1.32094	0.250424	-27023.7	-27030.8	tg_qn	tg_qn
uc002ckm.1	16	4721	864	0.0970391	0.00606495	2	11	13519.7	13519.7	0.157502	0.92427	-27014.1	-27030.8	lnfi+whr_qn	lnfi+whr_qn
uc002ckm.1	16	4721	864	0.0970391	0.00606495	1	10	13519.7	13519.7	0.0307009	0.860909	-27022.4	-27030.8	lnfi	lnfi
uc002ckm.1	16	4721	864	0.0970391	0.00606495	1	1	13519.7	13519.7	0.141833	0.706466	-27022.5	-27030.8	whr_qn	whr_qn
uc002ckk.2	544	4721	34496	3.81413	0.00701127	3	111	14349.8	14348.6	2.42929	0.488206	-28665.8	-28688.8	tg_qn+lnfi+whr_qn	lnfi+tg_qn+whr_qn
uc002ckk.2	544	4721	34496	3.81413	0.00701127	2	110	14349.7	14348.6	2.06645	0.355857	-28673.9	-28688.8	tg_qn+lnfi	lnfi+tg_qn
uc002ckk.2	544	4721	34496	3.81413	0.00701127	2	101	14349.1	14348.6	0.869697	0.647363	-28672.7	-28688.8	tg_qn+whr_qn	tg_qn+whr_qn
uc002ckk.2	544	4721	34496	3.81413	0.00701127	1	100	14348.8	14348.6	0.282933	0.594785	-28680.6	-28688.8	tg_qn	tg_qn
uc002ckk.2	544	4721	34496	3.81413	0.00701127	2	11	14349.3	14348.6	1.38288	0.500854	-28673.3	-28688.8	lnfi+whr_qn	lnfi+whr_qn
uc002ckk.2	544	4721	34496	3.81413	0.00701127	1	10	14349.2	14348.6	1.13935	0.28579	-28681.5	-28688.8	lnfi	lnfi
uc002ckk.2	544	4721	34496	3.81413	0.00701127	1	1	14348.9	14348.6	0.449646	0.502503	-28680.8	-28688.8	whr_qn	whr_qn
uc002ckn.2	12	4721	185	0.0201877	0.00168231	3	111	14978.9	14975.9	6.09872	0.106905	-29924	-29943.3	tg_qn+lnfi+whr_qn	lnfi+tg_qn+whr_qn
uc002ckn.2	12	4721	185	0.0201877	0.00168231	2	110	14978.9	14975.9	6.08386	0.0477427	-29932.5	-29943.3	tg_qn+lnfi	lnfi+tg_qn
uc002ckn.2	12	4721	185	0.0201877	0.00168231	2	101	14977.3	14975.9	2.86496	0.238717	-29929.2	-29943.3	tg_qn+whr_qn	tg_qn+whr_qn
uc002ckn.2	12	4721	185	0.0201877	0.00168231	1	100	14977.3	14975.9	2.83253	0.0923729	-29937.7	-29943.3	tg_qn	tg_qn
uc002ckn.2	12	4721	185	0.0201877	0.00168231	2	11	14978.5	14975.9	5.26202	0.0720057	-29931.6	-29943.3	lnfi+whr_qn	lnfi+whr_qn
uc002ckn.2	12	4721	185	0.0201877	0.00168231	1	10	14978.5	14975.9	5.25316	0.0219069	-29940.1	-29943.3	lnfi	lnfi
uc002ckn.2	12	4721	185	0.0201877	0.00168231	1	1	14976	14975.9	0.212402	0.644892	-29935	-29943.3	whr_qn	whr_qn
uc002cko.2	52	4721	1593	0.172755	0.00332222	3	111	13906.5	13903.7	5.66982	0.128827	-27779.2	-27798.9	tg_qn+lnfi+whr_qn	lnfi+tg_qn+whr_qn
uc002cko.2	52	4721	1593	0.172755	0.00332222	2	110	13905.5	13903.7	3.68962	0.158055	-27785.7	-27798.9	tg_qn+lnfi	lnfi+tg_qn
uc002cko.2	52	4721	1593	0.172755	0.00332222	2	101	13906.4	13903.7	5.46666	0.0650024	-27787.5	-27798.9	tg_qn+whr_qn	tg_qn+whr_qn
uc002cko.2	52	4721	1593	0.172755	0.00332222	1	100	13905.5	13903.7	3.61116	0.0573929	-27794.1	-27798.9	tg_qn	tg_qn
uc002cko.2	52	4721	1593	0.172755	0.00332222	2	11	13905.1	13903.7	2.8468	0.240893	-27784.8	-27798.9	lnfi+whr_qn	lnfi+whr_qn
uc002cko.2	52	4721	1593	0.172755	0.00332222	1	10	13903.8	13903.7	0.231145	0.630676	-27790.7	-27798.9	lnfi	lnfi
uc002cko.2	52	4721	1593	0.172755	0.00332222	1	1	13905.1	13903.7	2.80597	0.0939142	-27793.3	-27798.9	whr_qn	whr_qn
uc002ckp.1	2	4721	55	0.00604757	0.00302379	3	111	11322.5	11322.2	0.709195	0.871039	-22611.2	-22635.9	tg_qn+lnfi+whr_qn	lnfi+tg_qn+whr_qn
uc002ckp.1	2	4721	55	0.00604757	0.00302379	2	110	11322.2	11322.2	0.168767	0.919079	-22619.1	-22635.9	tg_qn+lnfi	lnfi+tg_qn
uc002ckp.1	2	4721	55	0.00604757	0.00302379	2	101	11322.5	11322.2	0.656561	0.720161	-22619.6	-22635.9	tg_qn+whr_qn	tg_qn+whr_qn
uc002ckp.1	2	4721	55	0.00604757	0.00302379	1	100	11322.2	11322.2	0.080973	0.775983	-22627.5	-22635.9	tg_qn	tg_qn
uc002ckp.1	2	4721	55	0.00604757	0.00302379	2	11	11322.4	11322.2	0.538453	0.76397	-22619.5	-22635.9	lnfi+whr_qn	lnfi+whr_qn
uc002ckp.1	2	4721	55	0.00604757	0.00302379	1	10	11322.2	11322.2	0.0520579	0.81952	-22627.4	-22635.9	lnfi	lnfi
uc002ckp.1	2	4721	55	0.00604757	0.00302379	1	1	11322.4	11322.2	0.504617	0.477478	-22627.9	-22635.9	whr_qn	whr_qn
uc002ckq.2	16	4721	719	0.0813918	0.00508699	3	111	13074.8	13074.4	0.828697	0.842592	-26115.8	-26140.3	tg_qn+lnfi+whr_qn	lnfi+tg_qn+whr_qn
uc002ckq.2	16	4721	719	0.0813918	0.00508699	2	110	13074.8	13074.4	0.757019	0.684882	-26124.2	-26140.3	tg_qn+lnfi	lnfi+tg_qn
uc002ckq.2	16	4721	719	0.0813918	0.00508699	2	101	13074.8	13074.4	0.785542	0.675183	-26124.2	-26140.3	tg_qn+whr_qn	tg_qn+whr_qn
uc002ckq.2	16	4721	719	0.0813918	0.00508699	1	100	13074.7	13074.4	0.70035	0.402666	-26132.6	-26140.3	tg_qn	tg_qn
uc002ckq.2	16	4721	719	0.0813918	0.00508699	2	11	13074.6	13074.4	0.380621	0.826702	-26123.8	-26140.3	lnfi+whr_qn	lnfi+whr_qn
uc002ckq.2	16	4721	719	0.0813918	0.00508699	1	10	13074.5	13074.4	0.262581	0.608352	-26132.1	-26140.3	lnfi	lnfi
uc002ckq.2	16	4721	719	0.0813918	0.00508699	1	1	13074.5	13074.4	0.182799	0.668979	-26132.1	-26140.3	whr_qn	whr_qn
uc010uuw.1	48	4721	2324	0.260935	0.00543615	3	111	12232.4	12230.5	3.84768	0.278388	-24431	-24452.5	tg_qn+lnfi+whr_qn	lnfi+tg_qn+whr_qn
uc010uuw.1	48	4721	2324	0.260935	0.00543615	2	110	12232.1	12230.5	3.25992	0.195937	-24438.8	-24452.5	tg_qn+lnfi	lnfi+tg_qn
uc010uuw.1	48	4721	2324	0.260935	0.00543615	2	101	12232.2	12230.5	3.47601	0.175871	-24439	-24452.5	tg_qn+whr_qn	tg_qn+whr_qn
uc010uuw.1	48	4721	2324	0.260935	0.00543615	1	100	12232	12230.5	2.99662	0.0834387	-24447	-24452.5	tg_qn	tg_qn
uc010uuw.1	48	4721	2324	0.260935	0.00543615	2	11	12230.9	12230.5	0.94355	0.623894	-24436.5	-24452.5	lnfi+whr_qn	lnfi+whr_qn
uc010uuw.1	48	4721	2324	0.260935	0.00543615	1	10	12230.5	12230.5	0.0053148	0.941884	-24444	-24452.5	lnfi	lnfi
uc010uuw.1	48	4721	2324	0.260935	0.00543615	1	1	12231	12230.5	0.953608	0.328803	-24445	-24452.5	whr_qn	whr_qn
uc002cks.2	465	4721	13902	1.57138	0.0033793	3	111	16294.3	16293.4	1.78895	0.617342	-32554.7	-32578.3	tg_qn+lnfi+whr_qn	lnfi+tg_qn+whr_qn
uc002cks.2	465	4721	13902	1.57138	0.0033793	2	110	16293.8	16293.4	0.934559	0.626705	-32562.3	-32578.3	tg_qn+lnfi	lnfi+tg_qn
uc002cks.2	465	4721	13902	1.57138	0.0033793	2	101	16294.1	16293.4	1.39497	0.497837	-32562.7	-32578.3	tg_qn+whr_qn	tg_qn+whr_qn
uc002cks.2	465	4721	13902	1.57138	0.0033793	1	100	16293.7	16293.4	0.670782	0.412779	-32570.5	-32578.3	tg_qn	tg_qn
uc002cks.2	465	4721	13902	1.57138	0.0033793	2	11	16294	16293.4	1.31789	0.517398	-32562.7	-32578.3	lnfi+whr_qn	lnfi+whr_qn
uc002cks.2	465	4721	13902	1.57138	0.0033793	1	10	16293.7	16293.4	0.59464	0.44063	-32570.4	-32578.3	lnfi	lnfi
uc002cks.2	465	4721	13902	1.57138	0.0033793	1	1	16293.6	16293.4	0.485303	0.48603	-32570.3	-32578.3	whr_qn	whr_qn
uc002ckt.2	465	4721	13902	1.57138	0.0033793	3	111	16294.3	16293.4	1.78895	0.617342	-32554.7	-32578.3	tg_qn+lnfi+whr_qn	lnfi+tg_qn+whr_qn
uc002ckt.2	465	4721	13902	1.57138	0.0033793	2	110	16293.8	16293.4	0.934559	0.626705	-32562.3	-32578.3	tg_qn+lnfi	lnfi+tg_qn
uc002ckt.2	465	4721	13902	1.57138	0.0033793	2	101	16294.1	16293.4	1.39497	0.497837	-32562.7	-32578.3	tg_qn+whr_qn	tg_qn+whr_qn
uc002ckt.2	465	4721	13902	1.57138	0.0033793	1	100	16293.7	16293.4	0.670782	0.412779	-32570.5	-32578.3	tg_qn	tg_qn
uc002ckt.2	465	4721	13902	1.57138	0.0033793	2	11	16294	16293.4	1.31789	0.517398	-32562.7	-32578.3	lnfi+whr_qn	lnfi+whr_qn
uc002ckt.2	465	4721	13902	1.57138	0.0033793	1	10	16293.7	16293.4	0.59464	0.44063	-32570.4	-32578.3	lnfi	lnfi
uc002ckt.2	465	4721	13902	1.57138	0.0033793	1	1	16293.6	16293.4	0.485303	0.48603	-32570.3	-32578.3	whr_qn	whr_qn
uc002cku.2	87	4721	4389	0.500162	0.00574898	3	111	14050.5	14050.3	0.416477	0.936818	-28067.2	-28092.1	tg_qn+lnfi+whr_qn	lnfi+tg_qn+whr_qn
uc002cku.2	87	4721	4389	0.500162	0.00574898	2	110	14050.5	14050.3	0.369761	0.831204	-28075.6	-28092.1	tg_qn+lnfi	lnfi+tg_qn
uc002cku.2	87	4721	4389	0.500162	0.00574898	2	101	14050.5	14050.3	0.376462	0.828423	-28075.6	-28092.1	tg_qn+whr_qn	tg_qn+whr_qn
uc002cku.2	87	4721	4389	0.500162	0.00574898	1	100	14050.5	14050.3	0.333995	0.563316	-28084	-28092.1	tg_qn	tg_qn
uc002cku.2	87	4721	4389	0.500162	0.00574898	2	11	14050.4	14050.3	0.151289	0.927146	-28075.4	-28092.1	lnfi+whr_qn	lnfi+whr_qn
uc002cku.2	87	4721	4389	0.500162	0.00574898	1	10	14050.4	14050.3	0.118665	0.730487	-28083.8	-28092.1	lnfi	lnfi
uc002cku.2	87	4721	4389	0.500162	0.00574898	1	1	14050.3	14050.3	0.0255622	0.872974	-28083.7	-28092.1	whr_qn	whr_qn
uc010brj.2	87	4721	4389	0.500162	0.00574898	3	111	14050.5	14050.3	0.416477	0.936818	-28067.2	-28092.1	tg_qn+lnfi+whr_qn	lnfi+tg_qn+whr_qn
uc010brj.2	87	4721	4389	0.500162	0.00574898	2	110	14050.5	14050.3	0.369761	0.831204	-28075.6	-28092.1	tg_qn+lnfi	lnfi+tg_qn
uc010brj.2	87	4721	4389	0.500162	0.00574898	2	101	14050.5	14050.3	0.376462	0.828423	-28075.6	-28092.1	tg_qn+whr_qn	tg_qn+whr_qn
uc010brj.2	87	4721	4389	0.500162	0.00574898	1	100	14050.5	14050.3	0.333995	0.563316	-28084	-28092.1	tg_qn	tg_qn
uc010brj.2	87	4721	4389	0.500162	0.00574898	2	11	14050.4	14050.3	0.151289	0.927146	-28075.4	-28092.1	lnfi+whr_qn	lnfi+whr_qn
uc010brj.2	87	4721	4389	0.500162	0.00574898	1	10	14050.4	14050.3	0.118665	0.730487	-28083.8	-28092.1	lnfi	lnfi
uc010brj.2	87	4721	4389	0.500162	0.00574898	1	1	14050.3	14050.3	0.0255622	0.872974	-28083.7	-28092.1	whr_qn	whr_qn
uc002ckv.2	87	4721	4389	0.500162	0.00574898	3	111	14050.5	14050.3	0.416477	0.936818	-28067.2	-28092.1	tg_qn+lnfi+whr_qn	lnfi+tg_qn+whr_qn
uc002ckv.2	87	4721	4389	0.500162	0.00574898	2	110	14050.5	14050.3	0.369761	0.831204	-28075.6	-28092.1	tg_qn+lnfi	lnfi+tg_qn
uc002ckv.2	87	4721	4389	0.500162	0.00574898	2	101	14050.5	14050.3	0.376462	0.828423	-28075.6	-28092.1	tg_qn+whr_qn	tg_qn+whr_qn
uc002ckv.2	87	4721	4389	0.500162	0.00574898	1	100	14050.5	14050.3	0.333995	0.563316	-28084	-28092.1	tg_qn	tg_qn
uc002ckv.2	87	4721	4389	0.500162	0.00574898	2	11	14050.4	14050.3	0.151289	0.927146	-28075.4	-28092.1	lnfi+whr_qn	lnfi+whr_qn
uc002ckv.2	87	4721	4389	0.500162	0.00574898	1	10	14050.4	14050.3	0.118665	0.730487	-28083.8	-28092.1	lnfi	lnfi
uc002ckv.2	87	4721	4389	0.500162	0.00574898	1	1	14050.3	14050.3	0.0255622	0.872974	-28083.7	-28092.1	whr_qn	whr_qn
uc002ckw.2	30	4721	2051	0.231634	0.00772114	3	111	12292.9	12291.8	2.20759	0.530455	-24551.9	-24575.1	tg_qn+lnfi+whr_qn	lnfi+tg_qn+whr_qn
uc002ckw.2	30	4721	2051	0.231634	0.00772114	2	110	12292.8	12291.8	1.97747	0.372047	-24560.1	-24575.1	tg_qn+lnfi	lnfi+tg_qn
uc002ckw.2	30	4721	2051	0.231634	0.00772114	2	101	12292.7	12291.8	1.9305	0.380888	-24560.1	-24575.1	tg_qn+whr_qn	tg_qn+whr_qn
uc002ckw.2	30	4721	2051	0.231634	0.00772114	1	100	12292.6	12291.8	1.63027	0.201666	-24568.3	-24575.1	tg_qn	tg_qn
uc002ckw.2	30	4721	2051	0.231634	0.00772114	2	11	12292.4	12291.8	1.34874	0.509478	-24559.5	-24575.1	lnfi+whr_qn	lnfi+whr_qn
uc002ckw.2	30	4721	2051	0.231634	0.00772114	1	10	12292.3	12291.8	1.00397	0.316351	-24567.6	-24575.1	lnfi	lnfi
uc002ckw.2	30	4721	2051	0.231634	0.00772114	1	1	12292.1	12291.8	0.573016	0.449063	-24567.2	-24575.1	whr_qn	whr_qn
uc002ckx.2	1	4721	83	0.00937429	0.00937429	3	111	7224.45	7219.81	9.27239	0.0258802	-14415.1	-14431.2	tg_qn+lnfi+whr_qn	lnfi+tg_qn+whr_qn
uc002ckx.2	1	4721	83	0.00937429	0.00937429	2	110	7223.8	7219.81	7.97617	0.0185351	-14422.2	-14431.2	tg_qn+lnfi	lnfi+tg_qn
uc002ckx.2	1	4721	83	0.00937429	0.00937429	2	101	7221.75	7219.81	3.87318	0.144195	-14418.1	-14431.2	tg_qn+whr_qn	tg_qn+whr_qn
uc002ckx.2	1	4721	83	0.00937429	0.00937429	1	100	7221.4	7219.81	3.17402	0.0748181	-14425.9	-14431.2	tg_qn	tg_qn
uc002ckx.2	1	4721	83	0.00937429	0.00937429	2	11	7223.96	7219.81	8.29432	0.0158093	-14422.5	-14431.2	lnfi+whr_qn	lnfi+whr_qn
uc002ckx.2	1	4721	83	0.00937429	0.00937429	1	10	7223.43	7219.81	7.23984	0.00713033	-14429.9	-14431.2	lnfi	lnfi
uc002ckx.2	1	4721	83	0.00937429	0.00937429	1	1	7219.94	7219.81	0.255159	0.613465	-14423	-14431.2	whr_qn	whr_qn
uc010brk.1	6	4721	311	0.0348164	0.00580274	3	111	12374.1	12371.5	5.32442	0.149525	-24714.4	-24734.5	tg_qn+lnfi+whr_qn	lnfi+tg_qn+whr_qn
uc010brk.1	6	4721	311	0.0348164	0.00580274	2	110	12374.1	12371.5	5.26605	0.0718608	-24722.8	-24734.5	tg_qn+lnfi	lnfi+tg_qn
uc010brk.1	6	4721	311	0.0348164	0.00580274	2	101	12371.6	12371.5	0.364429	0.833423	-24717.9	-24734.5	tg_qn+whr_qn	tg_qn+whr_qn
uc010brk.1	6	4721	311	0.0348164	0.00580274	1	100	12371.6	12371.5	0.252892	0.615046	-24726.2	-24734.5	tg_qn	tg_qn
uc010brk.1	6	4721	311	0.0348164	0.00580274	2	11	12374	12371.5	5.1613	0.0757248	-24722.7	-24734.5	lnfi+whr_qn	lnfi+whr_qn
uc010brk.1	6	4721	311	0.0348164	0.00580274	1	10	12374	12371.5	5.0942	0.024006	-24731.1	-24734.5	lnfi	lnfi
uc010brk.1	6	4721	311	0.0348164	0.00580274	1	1	12371.5	12371.5	0.157628	0.69135	-24726.2	-24734.5	whr_qn	whr_qn
uc002cky.2	1	4721	83	0.00937429	0.00937429	3	111	7224.45	7219.81	9.27239	0.0258802	-14415.1	-14431.2	tg_qn+lnfi+whr_qn	lnfi+tg_qn+whr_qn
uc002cky.2	1	4721	83	0.00937429	0.00937429	2	110	7223.8	7219.81	7.97617	0.0185351	-14422.2	-14431.2	tg_qn+lnfi	lnfi+tg_qn
uc002cky.2	1	4721	83	0.00937429	0.00937429	2	101	7221.75	7219.81	3.87318	0.144195	-14418.1	-14431.2	tg_qn+whr_qn	tg_qn+whr_qn
uc002cky.2	1	4721	83	0.00937429	0.00937429	1	100	7221.4	7219.81	3.17402	0.0748181	-14425.9	-14431.2	tg_qn	tg_qn
uc002cky.2	1	4721	83	0.00937429	0.00937429	2	11	7223.96	7219.81	8.29432	0.0158093	-14422.5	-14431.2	lnfi+whr_qn	lnfi+whr_qn
uc002cky.2	1	4721	83	0.00937429	0.00937429	1	10	7223.43	7219.81	7.23984	0.00713033	-14429.9	-14431.2	lnfi	lnfi
uc002cky.2	1	4721	83	0.00937429	0.00937429	1	1	7219.94	7219.81	0.255159	0.613465	-14423	-14431.2	whr_qn	whr_qn
uc002ckz.2	2	4721	15	0.00165699	0.000828494	3	111	14497.4	14496.3	2.29952	0.512614	-28961	-28984.1	tg_qn+lnfi+whr_qn	lnfi+tg_qn+whr_qn
uc002ckz.2	2	4721	15	0.00165699	0.000828494	2	110	14496.9	14496.3	1.26625	0.53093	-28968.5	-28984.1	tg_qn+lnfi	lnfi+tg_qn
uc002ckz.2	2	4721	15	0.00165699	0.000828494	2	101	14497.1	14496.3	1.60487	0.448237	-28968.8	-28984.1	tg_qn+whr_qn	tg_qn+whr_qn
uc002ckz.2	2	4721	15	0.00165699	0.000828494	1	100	14496.7	14496.3	0.769767	0.380289	-28976.4	-28984.1	tg_qn	tg_qn
uc002ckz.2	2	4721	15	0.00165699	0.000828494	2	11	14497.2	14496.3	1.84211	0.398098	-28969.1	-28984.1	lnfi+whr_qn	lnfi+whr_qn
uc002ckz.2	2	4721	15	0.00165699	0.000828494	1	10	14496.8	14496.3	0.954049	0.328691	-28976.6	-28984.1	lnfi	lnfi
uc002ckz.2	2	4721	15	0.00165699	0.000828494	1	1	14496.6	14496.3	0.552736	0.457202	-28976.2	-28984.1	whr_qn	whr_qn
uc010uux.1	2	4721	15	0.00165699	0.000828494	3	111	14497.4	14496.3	2.29952	0.512614	-28961	-28984.1	tg_qn+lnfi+whr_qn	lnfi+tg_qn+whr_qn
uc010uux.1	2	4721	15	0.00165699	0.000828494	2	110	14496.9	14496.3	1.26625	0.53093	-28968.5	-28984.1	tg_qn+lnfi	lnfi+tg_qn
uc010uux.1	2	4721	15	0.00165699	0.000828494	2	101	14497.1	14496.3	1.60487	0.448237	-28968.8	-28984.1	tg_qn+whr_qn	tg_qn+whr_qn
uc010uux.1	2	4721	15	0.00165699	0.000828494	1	100	14496.7	14496.3	0.769767	0.380289	-28976.4	-28984.1	tg_qn	tg_qn
uc010uux.1	2	4721	15	0.00165699	0.000828494	2	11	14497.2	14496.3	1.84211	0.398098	-28969.1	-28984.1	lnfi+whr_qn	lnfi+whr_qn
uc010uux.1	2	4721	15	0.00165699	0.000828494	1	10	14496.8	14496.3	0.954049	0.328691	-28976.6	-28984.1	lnfi	lnfi
uc010uux.1	2	4721	15	0.00165699	0.000828494	1	1	14496.6	14496.3	0.552736	0.457202	-28976.2	-28984.1	whr_qn	whr_qn
uc010brm.1	9	4721	378	0.0435948	0.00484387	3	111	14046.9	14046.5	0.875917	0.831235	-28060	-28084.5	tg_qn+lnfi+whr_qn	lnfi+tg_qn+whr_qn
uc010brm.1	9	4721	378	0.0435948	0.00484387	2	110	14046.7	14046.5	0.313354	0.85498	-28067.9	-28084.5	tg_qn+lnfi	lnfi+tg_qn
uc010brm.1	9	4721	378	0.0435948	0.00484387	2	101	14046.9	14046.5	0.780213	0.676985	-28068.4	-28084.5	tg_qn+whr_qn	tg_qn+whr_qn
uc010brm.1	9	4721	378	0.0435948	0.00484387	1	100	14046.6	14046.5	0.148093	0.700364	-28076.2	-28084.5	tg_qn	tg_qn
uc010brm.1	9	4721	378	0.0435948	0.00484387	2	11	14046.8	14046.5	0.535895	0.764948	-28068.2	-28084.5	lnfi+whr_qn	lnfi+whr_qn
uc010brm.1	9	4721	378	0.0435948	0.00484387	1	10	14046.5	14046.5	0.0625306	0.80254	-28076.1	-28084.5	lnfi	lnfi
uc010brm.1	9	4721	378	0.0435948	0.00484387	1	1	14046.8	14046.5	0.516378	0.472391	-28076.6	-28084.5	whr_qn	whr_qn
uc002clb.1	12	4721	396	0.0455534	0.00379612	3	111	15295.6	15295.2	0.732643	0.8655	-30557.4	-30582	tg_qn+lnfi+whr_qn	lnfi+tg_qn+whr_qn
uc002clb.1	12	4721	396	0.0455534	0.00379612	2	110	15295.3	15295.2	0.165816	0.920436	-30565.2	-30582	tg_qn+lnfi	lnfi+tg_qn
uc002clb.1	12	4721	396	0.0455534	0.00379612	2	101	15295.6	15295.2	0.71751	0.698545	-30565.8	-30582	tg_qn+whr_qn	tg_qn+whr_qn
uc002clb.1	12	4721	396	0.0455534	0.00379612	1	100	15295.3	15295.2	0.129672	0.718773	-30573.7	-30582	tg_qn	tg_qn
uc002clb.1	12	4721	396	0.0455534	0.00379612	2	11	15295.5	15295.2	0.508334	0.775562	-30565.6	-30582	lnfi+whr_qn	lnfi+whr_qn
uc002clb.1	12	4721	396	0.0455534	0.00379612	1	10	15295.2	15295.2	0.0125037	0.910966	-30573.6	-30582	lnfi	lnfi
uc002clb.1	12	4721	396	0.0455534	0.00379612	1	1	15295.5	15295.2	0.484328	0.486468	-30574	-30582	whr_qn	whr_qn
uc010uuy.1	13	4721	918	0.101556	0.00781203	3	111	12946.5	12946.2	0.510837	0.916504	-25859.1	-25883.9	tg_qn+lnfi+whr_qn	lnfi+tg_qn+whr_qn
uc010uuy.1	13	4721	918	0.101556	0.00781203	2	110	12946.4	12946.2	0.314984	0.854283	-25867.3	-25883.9	tg_qn+lnfi	lnfi+tg_qn
uc010uuy.1	13	4721	918	0.101556	0.00781203	2	101	12946.4	12946.2	0.3355	0.845565	-25867.4	-25883.9	tg_qn+whr_qn	tg_qn+whr_qn
uc010uuy.1	13	4721	918	0.101556	0.00781203	1	100	12946.2	12946.2	0.0844537	0.77135	-25875.6	-25883.9	tg_qn	tg_qn
uc010uuy.1	13	4721	918	0.101556	0.00781203	2	11	12946.5	12946.2	0.498785	0.779274	-25867.5	-25883.9	lnfi+whr_qn	lnfi+whr_qn
uc010uuy.1	13	4721	918	0.101556	0.00781203	1	10	12946.4	12946.2	0.297753	0.585294	-25875.8	-25883.9	lnfi	lnfi
uc010uuy.1	13	4721	918	0.101556	0.00781203	1	1	12946.3	12946.2	0.291711	0.589126	-25875.8	-25883.9	whr_qn	whr_qn
uc002cle.1	25	4721	1459	0.158972	0.00635887	3	111	12903.3	12901.3	3.87084	0.275753	-25772.7	-25794.2	tg_qn+lnfi+whr_qn	lnfi+tg_qn+whr_qn
uc002cle.1	25	4721	1459	0.158972	0.00635887	2	110	12903	12901.3	3.40745	0.182004	-25780.7	-25794.2	tg_qn+lnfi	lnfi+tg_qn
uc002cle.1	25	4721	1459	0.158972	0.00635887	2	101	12903.3	12901.3	3.84756	0.146054	-25781.1	-25794.2	tg_qn+whr_qn	tg_qn+whr_qn
uc002cle.1	25	4721	1459	0.158972	0.00635887	1	100	12903	12901.3	3.3519	0.0671276	-25789.1	-25794.2	tg_qn	tg_qn
uc002cle.1	25	4721	1459	0.158972	0.00635887	2	11	12902.1	12901.3	1.52462	0.466588	-25778.8	-25794.2	lnfi+whr_qn	lnfi+whr_qn
uc002cle.1	25	4721	1459	0.158972	0.00635887	1	10	12901.7	12901.3	0.770207	0.380153	-25786.5	-25794.2	lnfi	lnfi
uc002cle.1	25	4721	1459	0.158972	0.00635887	1	1	12901.9	12901.3	1.03196	0.309699	-25786.8	-25794.2	whr_qn	whr_qn
uc002clh.1	29	4721	1766	0.191794	0.00661357	3	111	12516.1	12514.6	3.05115	0.383806	-24998.4	-25020.7	tg_qn+lnfi+whr_qn	lnfi+tg_qn+whr_qn
uc002clh.1	29	4721	1766	0.191794	0.00661357	2	110	12516.1	12514.6	3.03779	0.218954	-25006.8	-25020.7	tg_qn+lnfi	lnfi+tg_qn
uc002clh.1	29	4721	1766	0.191794	0.00661357	2	101	12515.9	12514.6	2.61994	0.269828	-25006.4	-25020.7	tg_qn+whr_qn	tg_qn+whr_qn
uc002clh.1	29	4721	1766	0.191794	0.00661357	1	100	12515.9	12514.6	2.61737	0.105699	-25014.9	-25020.7	tg_qn	tg_qn
uc002clh.1	29	4721	1766	0.191794	0.00661357	2	11	12514.6	12514.6	0.103952	0.949352	-25003.9	-25020.7	lnfi+whr_qn	lnfi+whr_qn
uc002clh.1	29	4721	1766	0.191794	0.00661357	1	10	12514.6	12514.6	0.00325682	0.954491	-25012.2	-25020.7	lnfi	lnfi
uc002clh.1	29	4721	1766	0.191794	0.00661357	1	1	12514.6	12514.6	0.096307	0.756307	-25012.3	-25020.7	whr_qn	whr_qn
uc002cli.1	29	4721	1766	0.191794	0.00661357	3	111	12516.1	12514.6	3.05115	0.383806	-24998.4	-25020.7	tg_qn+lnfi+whr_qn	lnfi+tg_qn+whr_qn
uc002cli.1	29	4721	1766	0.191794	0.00661357	2	110	12516.1	12514.6	3.03779	0.218954	-25006.8	-25020.7	tg_qn+lnfi	lnfi+tg_qn
uc002cli.1	29	4721	1766	0.191794	0.00661357	2	101	12515.9	12514.6	2.61994	0.269828	-25006.4	-25020.7	tg_qn+whr_qn	tg_qn+whr_qn
uc002cli.1	29	4721	1766	0.191794	0.00661357	1	100	12515.9	12514.6	2.61737	0.105699	-25014.9	-25020.7	tg_qn	tg_qn
uc002cli.1	29	4721	1766	0.191794	0.00661357	2	11	12514.6	12514.6	0.103952	0.949352	-25003.9	-25020.7	lnfi+whr_qn	lnfi+whr_qn
uc002cli.1	29	4721	1766	0.191794	0.00661357	1	10	12514.6	12514.6	0.00325682	0.954491	-25012.2	-25020.7	lnfi	lnfi
uc002cli.1	29	4721	1766	0.191794	0.00661357	1	1	12514.6	12514.6	0.096307	0.756307	-25012.3	-25020.7	whr_qn	whr_qn
uc002clc.1	58	4721	3533	0.387512	0.00668123	3	111	14539	14537.3	3.4142	0.332061	-29044.1	-29066.1	tg_qn+lnfi+whr_qn	lnfi+tg_qn+whr_qn
uc002clc.1	58	4721	3533	0.387512	0.00668123	2	110	14538.9	14537.3	3.18549	0.203367	-29052.3	-29066.1	tg_qn+lnfi	lnfi+tg_qn
uc002clc.1	58	4721	3533	0.387512	0.00668123	2	101	14538.7	14537.3	2.83347	0.242505	-29052	-29066.1	tg_qn+whr_qn	tg_qn+whr_qn
uc002clc.1	58	4721	3533	0.387512	0.00668123	1	100	14538.6	14537.3	2.68683	0.101181	-29060.3	-29066.1	tg_qn	tg_qn
uc002clc.1	58	4721	3533	0.387512	0.00668123	2	11	14537.5	14537.3	0.479506	0.786822	-29049.6	-29066.1	lnfi+whr_qn	lnfi+whr_qn
uc002clc.1	58	4721	3533	0.387512	0.00668123	1	10	14537.3	14537.3	0.0105077	0.918354	-29057.6	-29066.1	lnfi	lnfi
uc002clc.1	58	4721	3533	0.387512	0.00668123	1	1	14537.5	14537.3	0.43941	0.507407	-29058	-29066.1	whr_qn	whr_qn
uc002cld.1	58	4721	3533	0.387512	0.00668123	3	111	14539	14537.3	3.4142	0.332061	-29044.1	-29066.1	tg_qn+lnfi+whr_qn	lnfi+tg_qn+whr_qn
uc002cld.1	58	4721	3533	0.387512	0.00668123	2	110	14538.9	14537.3	3.18549	0.203367	-29052.3	-29066.1	tg_qn+lnfi	lnfi+tg_qn
uc002cld.1	58	4721	3533	0.387512	0.00668123	2	101	14538.7	14537.3	2.83347	0.242505	-29052	-29066.1	tg_qn+whr_qn	tg_qn+whr_qn
uc002cld.1	58	4721	3533	0.387512	0.00668123	1	100	14538.6	14537.3	2.68683	0.101181	-29060.3	-29066.1	tg_qn	tg_qn
uc002cld.1	58	4721	3533	0.387512	0.00668123	2	11	14537.5	14537.3	0.479506	0.786822	-29049.6	-29066.1	lnfi+whr_qn	lnfi+whr_qn
uc002cld.1	58	4721	3533	0.387512	0.00668123	1	10	14537.3	14537.3	0.0105077	0.918354	-29057.6	-29066.1	lnfi	lnfi
uc002cld.1	58	4721	3533	0.387512	0.00668123	1	1	14537.5	14537.3	0.43941	0.507407	-29058	-29066.1	whr_qn	whr_qn
uc002clf.1	57	4721	3517	0.38578	0.00676807	3	111	14457.7	14456	3.22435	0.358312	-28881.5	-28903.6	tg_qn+lnfi+whr_qn	lnfi+tg_qn+whr_qn
uc002clf.1	57	4721	3517	0.38578	0.00676807	2	110	14457.6	14456	3.01118	0.221887	-28889.7	-28903.6	tg_qn+lnfi	lnfi+tg_qn
uc002clf.1	57	4721	3517	0.38578	0.00676807	2	101	14457.3	14456	2.57182	0.276399	-28889.3	-28903.6	tg_qn+whr_qn	tg_qn+whr_qn
uc002clf.1	57	4721	3517	0.38578	0.00676807	1	100	14457.3	14456	2.44195	0.118129	-28897.6	-28903.6	tg_qn	tg_qn
uc002clf.1	57	4721	3517	0.38578	0.00676807	2	11	14456.3	14456	0.462207	0.793657	-28887.2	-28903.6	lnfi+whr_qn	lnfi+whr_qn
uc002clf.1	57	4721	3517	0.38578	0.00676807	1	10	14456.1	14456	0.0239368	0.877046	-28895.2	-28903.6	lnfi	lnfi
uc002clf.1	57	4721	3517	0.38578	0.00676807	1	1	14456.2	14456	0.393063	0.530694	-28895.6	-28903.6	whr_qn	whr_qn
uc002clg.1	57	4721	3517	0.38578	0.00676807	3	111	14457.7	14456	3.22435	0.358312	-28881.5	-28903.6	tg_qn+lnfi+whr_qn	lnfi+tg_qn+whr_qn
uc002clg.1	57	4721	3517	0.38578	0.00676807	2	110	14457.6	14456	3.01118	0.221887	-28889.7	-28903.6	tg_qn+lnfi	lnfi+tg_qn
uc002clg.1	57	4721	3517	0.38578	0.00676807	2	101	14457.3	14456	2.57182	0.276399	-28889.3	-28903.6	tg_qn+whr_qn	tg_qn+whr_qn
uc002clg.1	57	4721	3517	0.38578	0.00676807	1	100	14457.3	14456	2.44195	0.118129	-28897.6	-28903.6	tg_qn	tg_qn
uc002clg.1	57	4721	3517	0.38578	0.00676807	2	11	14456.3	14456	0.462207	0.793657	-28887.2	-28903.6	lnfi+whr_qn	lnfi+whr_qn
uc002clg.1	57	4721	3517	0.38578	0.00676807	1	10	14456.1	14456	0.0239368	0.877046	-28895.2	-28903.6	lnfi	lnfi
uc002clg.1	57	4721	3517	0.38578	0.00676807	1	1	14456.2	14456	0.393063	0.530694	-28895.6	-28903.6	whr_qn	whr_qn
uc010uvb.1	37	4721	3265	0.360732	0.00974953	3	111	13612.7	13612.5	0.497395	0.919463	-27191.6	-27216.5	tg_qn+lnfi+whr_qn	lnfi+tg_qn+whr_qn
uc010uvb.1	37	4721	3265	0.360732	0.00974953	2	110	13612.7	13612.5	0.479136	0.786968	-27200	-27216.5	tg_qn+lnfi	lnfi+tg_qn
uc010uvb.1	37	4721	3265	0.360732	0.00974953	2	101	13612.7	13612.5	0.398947	0.819162	-27199.9	-27216.5	tg_qn+whr_qn	tg_qn+whr_qn
uc010uvb.1	37	4721	3265	0.360732	0.00974953	1	100	13612.6	13612.5	0.373143	0.541296	-27208.4	-27216.5	tg_qn	tg_qn
uc010uvb.1	37	4721	3265	0.360732	0.00974953	2	11	13612.6	13612.5	0.295457	0.862665	-27199.8	-27216.5	lnfi+whr_qn	lnfi+whr_qn
uc010uvb.1	37	4721	3265	0.360732	0.00974953	1	10	13612.6	13612.5	0.266454	0.60572	-27208.3	-27216.5	lnfi	lnfi
uc010uvb.1	37	4721	3265	0.360732	0.00974953	1	1	13612.5	13612.5	0.060573	0.805593	-27208.1	-27216.5	whr_qn	whr_qn
uc002clj.2	71	4721	6027	0.665229	0.00936943	3	111	14254.9	14254.5	0.671504	0.879885	-28475.9	-28500.6	tg_qn+lnfi+whr_qn	lnfi+tg_qn+whr_qn
uc002clj.2	71	4721	6027	0.665229	0.00936943	2	110	14254.7	14254.5	0.231551	0.890675	-28484	-28500.6	tg_qn+lnfi	lnfi+tg_qn
uc002clj.2	71	4721	6027	0.665229	0.00936943	2	101	14254.9	14254.5	0.658575	0.719436	-28484.4	-28500.6	tg_qn+whr_qn	tg_qn+whr_qn
uc002clj.2	71	4721	6027	0.665229	0.00936943	1	100	14254.7	14254.5	0.211016	0.645972	-28492.4	-28500.6	tg_qn	tg_qn
uc002clj.2	71	4721	6027	0.665229	0.00936943	2	11	14254.8	14254.5	0.567405	0.752991	-28484.3	-28500.6	lnfi+whr_qn	lnfi+whr_qn
uc002clj.2	71	4721	6027	0.665229	0.00936943	1	10	14254.6	14254.5	0.0720153	0.788425	-28492.3	-28500.6	lnfi	lnfi
uc002clj.2	71	4721	6027	0.665229	0.00936943	1	1	14254.8	14254.5	0.54258	0.461365	-28492.7	-28500.6	whr_qn	whr_qn
uc010uuz.1	71	4721	6027	0.665229	0.00936943	3	111	14254.9	14254.5	0.671504	0.879885	-28475.9	-28500.6	tg_qn+lnfi+whr_qn	lnfi+tg_qn+whr_qn
uc010uuz.1	71	4721	6027	0.665229	0.00936943	2	110	14254.7	14254.5	0.231551	0.890675	-28484	-28500.6	tg_qn+lnfi	lnfi+tg_qn
uc010uuz.1	71	4721	6027	0.665229	0.00936943	2	101	14254.9	14254.5	0.658575	0.719436	-28484.4	-28500.6	tg_qn+whr_qn	tg_qn+whr_qn
uc010uuz.1	71	4721	6027	0.665229	0.00936943	1	100	14254.7	14254.5	0.211016	0.645972	-28492.4	-28500.6	tg_qn	tg_qn
uc010uuz.1	71	4721	6027	0.665229	0.00936943	2	11	14254.8	14254.5	0.567405	0.752991	-28484.3	-28500.6	lnfi+whr_qn	lnfi+whr_qn
uc010uuz.1	71	4721	6027	0.665229	0.00936943	1	10	14254.6	14254.5	0.0720153	0.788425	-28492.3	-28500.6	lnfi	lnfi
uc010uuz.1	71	4721	6027	0.665229	0.00936943	1	1	14254.8	14254.5	0.54258	0.461365	-28492.7	-28500.6	whr_qn	whr_qn
uc010uva.1	71	4721	6027	0.665229	0.00936943	3	111	14254.9	14254.5	0.671504	0.879885	-28475.9	-28500.6	tg_qn+lnfi+whr_qn	lnfi+tg_qn+whr_qn
uc010uva.1	71	4721	6027	0.665229	0.00936943	2	110	14254.7	14254.5	0.231551	0.890675	-28484	-28500.6	tg_qn+lnfi	lnfi+tg_qn
uc010uva.1	71	4721	6027	0.665229	0.00936943	2	101	14254.9	14254.5	0.658575	0.719436	-28484.4	-28500.6	tg_qn+whr_qn	tg_qn+whr_qn
uc010uva.1	71	4721	6027	0.665229	0.00936943	1	100	14254.7	14254.5	0.211016	0.645972	-28492.4	-28500.6	tg_qn	tg_qn
uc010uva.1	71	4721	6027	0.665229	0.00936943	2	11	14254.8	14254.5	0.567405	0.752991	-28484.3	-28500.6	lnfi+whr_qn	lnfi+whr_qn
uc010uva.1	71	4721	6027	0.665229	0.00936943	1	10	14254.6	14254.5	0.0720153	0.788425	-28492.3	-28500.6	lnfi	lnfi
uc010uva.1	71	4721	6027	0.665229	0.00936943	1	1	14254.8	14254.5	0.54258	0.461365	-28492.7	-28500.6	whr_qn	whr_qn
uc002clk.1	69	4721	5495	0.605701	0.00877827	3	111	14210.6	14210.2	0.678592	0.878227	-28387.3	-28412	tg_qn+lnfi+whr_qn	lnfi+tg_qn+whr_qn
uc002clk.1	69	4721	5495	0.605701	0.00877827	2	110	14210.3	14210.2	0.175613	0.915938	-28395.3	-28412	tg_qn+lnfi	lnfi+tg_qn
uc002clk.1	69	4721	5495	0.605701	0.00877827	2	101	14210.6	14210.2	0.652682	0.721559	-28395.8	-28412	tg_qn+whr_qn	tg_qn+whr_qn
uc002clk.1	69	4721	5495	0.605701	0.00877827	1	100	14210.3	14210.2	0.118084	0.731122	-28403.7	-28412	tg_qn	tg_qn
uc002clk.1	69	4721	5495	0.605701	0.00877827	2	11	14210.6	14210.2	0.647048	0.723595	-28395.8	-28412	lnfi+whr_qn	lnfi+whr_qn
uc002clk.1	69	4721	5495	0.605701	0.00877827	1	10	14210.3	14210.2	0.112801	0.736977	-28403.7	-28412	lnfi	lnfi
uc002clk.1	69	4721	5495	0.605701	0.00877827	1	1	14210.5	14210.2	0.603679	0.437178	-28404.2	-28412	whr_qn	whr_qn
uc010uvc.1	62	4721	4767	0.525781	0.00848035	3	111	14114.5	14114.1	0.778465	0.854611	-28195.1	-28219.7	tg_qn+lnfi+whr_qn	lnfi+tg_qn+whr_qn
uc010uvc.1	62	4721	4767	0.525781	0.00848035	2	110	14114.1	14114.1	0.0767913	0.962332	-28202.9	-28219.7	tg_qn+lnfi	lnfi+tg_qn
uc010uvc.1	62	4721	4767	0.525781	0.00848035	2	101	14114.5	14114.1	0.750903	0.686979	-28203.5	-28219.7	tg_qn+whr_qn	tg_qn+whr_qn
uc010uvc.1	62	4721	4767	0.525781	0.00848035	1	100	14114.1	14114.1	0.0646277	0.799326	-28211.3	-28219.7	tg_qn	tg_qn
uc010uvc.1	62	4721	4767	0.525781	0.00848035	2	11	14114.5	14114.1	0.752869	0.686304	-28203.5	-28219.7	lnfi+whr_qn	lnfi+whr_qn
uc010uvc.1	62	4721	4767	0.525781	0.00848035	1	10	14114.1	14114.1	0.0169451	0.896429	-28211.3	-28219.7	lnfi	lnfi
uc010uvc.1	62	4721	4767	0.525781	0.00848035	1	1	14114.4	14114.1	0.732719	0.392003	-28212	-28219.7	whr_qn	whr_qn
uc002cll.2	5	4721	851	0.0938217	0.0187643	3	111	8499.39	8497.9	2.97468	0.395545	-16964.9	-16987.3	tg_qn+lnfi+whr_qn	lnfi+tg_qn+whr_qn
uc002cll.2	5	4721	851	0.0938217	0.0187643	2	110	8499.1	8497.9	2.38758	0.30307	-16972.8	-16987.3	tg_qn+lnfi	lnfi+tg_qn
uc002cll.2	5	4721	851	0.0938217	0.0187643	2	101	8499.24	8497.9	2.68379	0.26135	-16973.1	-16987.3	tg_qn+whr_qn	tg_qn+whr_qn
uc002cll.2	5	4721	851	0.0938217	0.0187643	1	100	8498.89	8497.9	1.97591	0.159821	-16980.9	-16987.3	tg_qn	tg_qn
uc002cll.2	5	4721	851	0.0938217	0.0187643	2	11	8498.9	8497.9	1.9995	0.367971	-16972.4	-16987.3	lnfi+whr_qn	lnfi+whr_qn
uc002cll.2	5	4721	851	0.0938217	0.0187643	1	10	8498.51	8497.9	1.21311	0.270717	-16980.1	-16987.3	lnfi	lnfi
uc002cll.2	5	4721	851	0.0938217	0.0187643	1	1	8498.48	8497.9	1.15092	0.283357	-16980	-16987.3	whr_qn	whr_qn
uc002clm.2	29	4721	1070	0.117883	0.00406492	3	111	17141.5	17140	2.9431	0.400482	-34249.2	-34271.6	tg_qn+lnfi+whr_qn	lnfi+tg_qn+whr_qn
uc002clm.2	29	4721	1070	0.117883	0.00406492	2	110	17140.5	17140	0.877449	0.644858	-34255.6	-34271.6	tg_qn+lnfi	lnfi+tg_qn
uc002clm.2	29	4721	1070	0.117883	0.00406492	2	101	17141.4	17140	2.76483	0.250972	-34257.5	-34271.6	tg_qn+whr_qn	tg_qn+whr_qn
uc002clm.2	29	4721	1070	0.117883	0.00406492	1	100	17140.4	17140	0.817019	0.366053	-34264	-34271.6	tg_qn	tg_qn
uc002clm.2	29	4721	1070	0.117883	0.00406492	2	11	17141.2	17140	2.38686	0.303179	-34257.1	-34271.6	lnfi+whr_qn	lnfi+whr_qn
uc002clm.2	29	4721	1070	0.117883	0.00406492	1	10	17140	17140	0.0283726	0.866236	-34263.2	-34271.6	lnfi	lnfi
uc002clm.2	29	4721	1070	0.117883	0.00406492	1	1	17141.2	17140	2.34711	0.125515	-34265.5	-34271.6	whr_qn	whr_qn
uc002cln.2	68	4721	3425	0.375133	0.00551667	3	111	14090.2	14090.1	0.100887	0.991731	-28146.5	-28171.8	tg_qn+lnfi+whr_qn	lnfi+tg_qn+whr_qn
uc002cln.2	68	4721	3425	0.375133	0.00551667	2	110	14090.2	14090.1	0.0318185	0.984217	-28154.9	-28171.8	tg_qn+lnfi	lnfi+tg_qn
uc002cln.2	68	4721	3425	0.375133	0.00551667	2	101	14090.2	14090.1	0.088631	0.956652	-28155	-28171.8	tg_qn+whr_qn	tg_qn+whr_qn
uc002cln.2	68	4721	3425	0.375133	0.00551667	1	100	14090.1	14090.1	0.0146557	0.903643	-28163.4	-28171.8	tg_qn	tg_qn
uc002cln.2	68	4721	3425	0.375133	0.00551667	2	11	14090.2	14090.1	0.091418	0.95532	-28155	-28171.8	lnfi+whr_qn	lnfi+whr_qn
uc002cln.2	68	4721	3425	0.375133	0.00551667	1	10	14090.1	14090.1	0.021022	0.884719	-28163.4	-28171.8	lnfi	lnfi
uc002cln.2	68	4721	3425	0.375133	0.00551667	1	1	14090.2	14090.1	0.0785353	0.779292	-28163.4	-28171.8	whr_qn	whr_qn
uc002clo.2	68	4721	3425	0.375133	0.00551667	3	111	14090.2	14090.1	0.100887	0.991731	-28146.5	-28171.8	tg_qn+lnfi+whr_qn	lnfi+tg_qn+whr_qn
uc002clo.2	68	4721	3425	0.375133	0.00551667	2	110	14090.2	14090.1	0.0318185	0.984217	-28154.9	-28171.8	tg_qn+lnfi	lnfi+tg_qn
uc002clo.2	68	4721	3425	0.375133	0.00551667	2	101	14090.2	14090.1	0.088631	0.956652	-28155	-28171.8	tg_qn+whr_qn	tg_qn+whr_qn
uc002clo.2	68	4721	3425	0.375133	0.00551667	1	100	14090.1	14090.1	0.0146557	0.903643	-28163.4	-28171.8	tg_qn	tg_qn
uc002clo.2	68	4721	3425	0.375133	0.00551667	2	11	14090.2	14090.1	0.091418	0.95532	-28155	-28171.8	lnfi+whr_qn	lnfi+whr_qn
uc002clo.2	68	4721	3425	0.375133	0.00551667	1	10	14090.1	14090.1	0.021022	0.884719	-28163.4	-28171.8	lnfi	lnfi
uc002clo.2	68	4721	3425	0.375133	0.00551667	1	1	14090.2	14090.1	0.0785353	0.779292	-28163.4	-28171.8	whr_qn	whr_qn
uc002clp.2	68	4721	3425	0.375133	0.00551667	3	111	14090.2	14090.1	0.100887	0.991731	-28146.5	-28171.8	tg_qn+lnfi+whr_qn	lnfi+tg_qn+whr_qn
uc002clp.2	68	4721	3425	0.375133	0.00551667	2	110	14090.2	14090.1	0.0318185	0.984217	-28154.9	-28171.8	tg_qn+lnfi	lnfi+tg_qn
uc002clp.2	68	4721	3425	0.375133	0.00551667	2	101	14090.2	14090.1	0.088631	0.956652	-28155	-28171.8	tg_qn+whr_qn	tg_qn+whr_qn
uc002clp.2	68	4721	3425	0.375133	0.00551667	1	100	14090.1	14090.1	0.0146557	0.903643	-28163.4	-28171.8	tg_qn	tg_qn
uc002clp.2	68	4721	3425	0.375133	0.00551667	2	11	14090.2	14090.1	0.091418	0.95532	-28155	-28171.8	lnfi+whr_qn	lnfi+whr_qn
uc002clp.2	68	4721	3425	0.375133	0.00551667	1	10	14090.1	14090.1	0.021022	0.884719	-28163.4	-28171.8	lnfi	lnfi
uc002clp.2	68	4721	3425	0.375133	0.00551667	1	1	14090.2	14090.1	0.0785353	0.779292	-28163.4	-28171.8	whr_qn	whr_qn
uc010brn.1	123	4721	6594	0.731056	0.00594355	3	111	15679.3	15679	0.597694	0.89696	-31324.8	-31349.6	tg_qn+lnfi+whr_qn	lnfi+tg_qn+whr_qn
uc010brn.1	123	4721	6594	0.731056	0.00594355	2	110	15679.1	15679	0.189704	0.909508	-31332.9	-31349.6	tg_qn+lnfi	lnfi+tg_qn
uc010brn.1	123	4721	6594	0.731056	0.00594355	2	101	15679.3	15679	0.484191	0.784981	-31333.2	-31349.6	tg_qn+whr_qn	tg_qn+whr_qn
uc010brn.1	123	4721	6594	0.731056	0.00594355	1	100	15679.1	15679	0.0129175	0.909511	-31341.2	-31349.6	tg_qn	tg_qn
uc010brn.1	123	4721	6594	0.731056	0.00594355	2	11	15679.3	15679	0.530859	0.766877	-31333.2	-31349.6	lnfi+whr_qn	lnfi+whr_qn
uc010brn.1	123	4721	6594	0.731056	0.00594355	1	10	15679.1	15679	0.151706	0.696911	-31341.3	-31349.6	lnfi	lnfi
uc010brn.1	123	4721	6594	0.731056	0.00594355	1	1	15679.3	15679	0.454172	0.50036	-31341.6	-31349.6	whr_qn	whr_qn
uc010bro.1	75	4721	2173	0.241473	0.00321964	3	111	18804.8	18803.5	2.55386	0.465636	-37575.7	-37598.5	tg_qn+lnfi+whr_qn	lnfi+tg_qn+whr_qn
uc010bro.1	75	4721	2173	0.241473	0.00321964	2	110	18803.7	18803.5	0.457456	0.795545	-37582.1	-37598.5	tg_qn+lnfi	lnfi+tg_qn
uc010bro.1	75	4721	2173	0.241473	0.00321964	2	101	18804.7	18803.5	2.33193	0.311622	-37583.9	-37598.5	tg_qn+whr_qn	tg_qn+whr_qn
uc010bro.1	75	4721	2173	0.241473	0.00321964	1	100	18803.5	18803.5	0.014535	0.904039	-37590.1	-37598.5	tg_qn	tg_qn
uc010bro.1	75	4721	2173	0.241473	0.00321964	2	11	18804.6	18803.5	2.31678	0.313991	-37583.9	-37598.5	lnfi+whr_qn	lnfi+whr_qn
uc010bro.1	75	4721	2173	0.241473	0.00321964	1	10	18803.7	18803.5	0.353784	0.551979	-37590.4	-37598.5	lnfi	lnfi
uc010bro.1	75	4721	2173	0.241473	0.00321964	1	1	18804.6	18803.5	2.207	0.137386	-37592.3	-37598.5	whr_qn	whr_qn
uc002clq.2	71	4721	1910	0.2118	0.0029831	3	111	18773.5	18772.2	2.58947	0.459338	-37513.2	-37536	tg_qn+lnfi+whr_qn	lnfi+tg_qn+whr_qn
uc002clq.2	71	4721	1910	0.2118	0.0029831	2	110	18772.9	18772.2	1.32715	0.515008	-37520.4	-37536	tg_qn+lnfi	lnfi+tg_qn
uc002clq.2	71	4721	1910	0.2118	0.0029831	2	101	18773	18772.2	1.6088	0.447356	-37520.7	-37536	tg_qn+whr_qn	tg_qn+whr_qn
uc002clq.2	71	4721	1910	0.2118	0.0029831	1	100	18772.2	18772.2	0.008002	0.928721	-37527.6	-37536	tg_qn	tg_qn
uc002clq.2	71	4721	1910	0.2118	0.0029831	2	11	18773.4	18772.2	2.2967	0.317159	-37521.4	-37536	lnfi+whr_qn	lnfi+whr_qn
uc002clq.2	71	4721	1910	0.2118	0.0029831	1	10	18772.8	18772.2	1.15677	0.282137	-37528.7	-37536	lnfi	lnfi
uc002clq.2	71	4721	1910	0.2118	0.0029831	1	1	18773	18772.2	1.55801	0.211957	-37529.1	-37536	whr_qn	whr_qn
uc002clr.2	1	4721	6	0.000651042	0.000651042	3	111	13385.8	13382.4	6.92022	0.0744847	-26737.8	-26756.2	tg_qn+lnfi+whr_qn	lnfi+tg_qn+whr_qn
uc002clr.2	1	4721	6	0.000651042	0.000651042	2	110	13385.8	13382.4	6.82661	0.0329321	-26746.2	-26756.2	tg_qn+lnfi	lnfi+tg_qn
uc002clr.2	1	4721	6	0.000651042	0.000651042	2	101	13383.6	13382.4	2.45311	0.293301	-26741.8	-26756.2	tg_qn+whr_qn	tg_qn+whr_qn
uc002clr.2	1	4721	6	0.000651042	0.000651042	1	100	13383.4	13382.4	2.10189	0.147117	-26749.9	-26756.2	tg_qn	tg_qn
uc002clr.2	1	4721	6	0.000651042	0.000651042	2	11	13385.7	13382.4	6.65542	0.0358752	-26746	-26756.2	lnfi+whr_qn	lnfi+whr_qn
uc002clr.2	1	4721	6	0.000651042	0.000651042	1	10	13385.6	13382.4	6.51812	0.0106781	-26754.3	-26756.2	lnfi	lnfi
uc002clr.2	1	4721	6	0.000651042	0.000651042	1	1	13382.7	13382.4	0.706102	0.400741	-26748.5	-26756.2	whr_qn	whr_qn
uc010uvd.1	32	4721	1349	0.150106	0.00469083	3	111	15954.4	15953.8	1.29051	0.731388	-31875	-31899.1	tg_qn+lnfi+whr_qn	lnfi+tg_qn+whr_qn
uc010uvd.1	32	4721	1349	0.150106	0.00469083	2	110	15954.1	15953.8	0.600641	0.740581	-31882.8	-31899.1	tg_qn+lnfi	lnfi+tg_qn
uc010uvd.1	32	4721	1349	0.150106	0.00469083	2	101	15954.2	15953.8	0.82614	0.661616	-31883	-31899.1	tg_qn+whr_qn	tg_qn+whr_qn
uc010uvd.1	32	4721	1349	0.150106	0.00469083	1	100	15953.9	15953.8	0.264073	0.607336	-31890.9	-31899.1	tg_qn	tg_qn
uc010uvd.1	32	4721	1349	0.150106	0.00469083	2	11	15954.3	15953.8	1.14878	0.563049	-31883.3	-31899.1	lnfi+whr_qn	lnfi+whr_qn
uc010uvd.1	32	4721	1349	0.150106	0.00469083	1	10	15954	15953.8	0.517111	0.472077	-31891.1	-31899.1	lnfi	lnfi
uc010uvd.1	32	4721	1349	0.150106	0.00469083	1	1	15954	15953.8	0.425097	0.514405	-31891	-31899.1	whr_qn	whr_qn
uc010brp.2	7	4721	1328	0.152688	0.0218125	3	111	8678.74	8677.66	2.16166	0.539539	-17323.6	-17346.9	tg_qn+lnfi+whr_qn	lnfi+tg_qn+whr_qn
uc010brp.2	7	4721	1328	0.152688	0.0218125	2	110	8677.86	8677.66	0.394509	0.820982	-17330.3	-17346.9	tg_qn+lnfi	lnfi+tg_qn
uc010brp.2	7	4721	1328	0.152688	0.0218125	2	101	8678.49	8677.66	1.66673	0.434585	-17331.6	-17346.9	tg_qn+whr_qn	tg_qn+whr_qn
uc010brp.2	7	4721	1328	0.152688	0.0218125	1	100	8677.71	8677.66	0.0994448	0.752497	-17338.5	-17346.9	tg_qn	tg_qn
uc010brp.2	7	4721	1328	0.152688	0.0218125	2	11	8678.69	8677.66	2.05808	0.35735	-17332	-17346.9	lnfi+whr_qn	lnfi+whr_qn
uc010brp.2	7	4721	1328	0.152688	0.0218125	1	10	8677.74	8677.66	0.162148	0.687187	-17338.6	-17346.9	lnfi	lnfi
uc010brp.2	7	4721	1328	0.152688	0.0218125	1	1	8678.49	8677.66	1.66079	0.197496	-17340.1	-17346.9	whr_qn	whr_qn
uc010uve.1	55	4721	7580	0.863137	0.0156934	3	111	10711.1	10710.9	0.464409	0.926638	-21388.4	-21413.4	tg_qn+lnfi+whr_qn	lnfi+tg_qn+whr_qn
uc010uve.1	55	4721	7580	0.863137	0.0156934	2	110	10711.1	10710.9	0.39955	0.818915	-21396.8	-21413.4	tg_qn+lnfi	lnfi+tg_qn
uc010uve.1	55	4721	7580	0.863137	0.0156934	2	101	10711	10710.9	0.161981	0.922202	-21396.6	-21413.4	tg_qn+whr_qn	tg_qn+whr_qn
uc010uve.1	55	4721	7580	0.863137	0.0156934	1	100	10710.9	10710.9	0.0676977	0.794719	-21405	-21413.4	tg_qn	tg_qn
uc010uve.1	55	4721	7580	0.863137	0.0156934	2	11	10711.1	10710.9	0.414909	0.81265	-21396.8	-21413.4	lnfi+whr_qn	lnfi+whr_qn
uc010uve.1	55	4721	7580	0.863137	0.0156934	1	10	10711.1	10710.9	0.351782	0.553106	-21405.2	-21413.4	lnfi	lnfi
uc010uve.1	55	4721	7580	0.863137	0.0156934	1	1	10711	10710.9	0.10717	0.743389	-21405	-21413.4	whr_qn	whr_qn
uc010brq.1	14	4721	2574	0.289861	0.0207044	3	111	7551.38	7551.02	0.726532	0.866946	-15068.9	-15093.6	tg_qn+lnfi+whr_qn	lnfi+tg_qn+whr_qn
uc010brq.1	14	4721	2574	0.289861	0.0207044	2	110	7551.34	7551.02	0.645559	0.724133	-15077.3	-15093.6	tg_qn+lnfi	lnfi+tg_qn
uc010brq.1	14	4721	2574	0.289861	0.0207044	2	101	7551.21	7551.02	0.369373	0.831365	-15077	-15093.6	tg_qn+whr_qn	tg_qn+whr_qn
uc010brq.1	14	4721	2574	0.289861	0.0207044	1	100	7551.17	7551.02	0.301695	0.582822	-15085.4	-15093.6	tg_qn	tg_qn
uc010brq.1	14	4721	2574	0.289861	0.0207044	2	11	7551.15	7551.02	0.264799	0.875991	-15076.9	-15093.6	lnfi+whr_qn	lnfi+whr_qn
uc010brq.1	14	4721	2574	0.289861	0.0207044	1	10	7551.1	7551.02	0.157651	0.691328	-15085.3	-15093.6	lnfi	lnfi
uc010brq.1	14	4721	2574	0.289861	0.0207044	1	1	7551.06	7551.02	0.085196	0.770376	-15085.2	-15093.6	whr_qn	whr_qn
uc002clu.2	28	4721	5900	0.659832	0.0235654	3	111	6937.89	6937.61	0.564574	0.904492	-13841.9	-13866.8	tg_qn+lnfi+whr_qn	lnfi+tg_qn+whr_qn
uc002clu.2	28	4721	5900	0.659832	0.0235654	2	110	6937.86	6937.61	0.497529	0.779764	-13850.3	-13866.8	tg_qn+lnfi	lnfi+tg_qn
uc002clu.2	28	4721	5900	0.659832	0.0235654	2	101	6937.77	6937.61	0.324204	0.850354	-13850.2	-13866.8	tg_qn+whr_qn	tg_qn+whr_qn
uc002clu.2	28	4721	5900	0.659832	0.0235654	1	100	6937.75	6937.61	0.270562	0.602955	-13858.6	-13866.8	tg_qn	tg_qn
uc002clu.2	28	4721	5900	0.659832	0.0235654	2	11	6937.71	6937.61	0.18635	0.911034	-13850	-13866.8	lnfi+whr_qn	lnfi+whr_qn
uc002clu.2	28	4721	5900	0.659832	0.0235654	1	10	6937.66	6937.61	0.0935972	0.759653	-13858.4	-13866.8	lnfi	lnfi
uc002clu.2	28	4721	5900	0.659832	0.0235654	1	1	6937.65	6937.61	0.0751572	0.783971	-13858.4	-13866.8	whr_qn	whr_qn
uc002clv.2	147	4721	24582	2.72713	0.0185519	3	111	8552.1	8551.87	0.444888	0.930821	-17070.4	-17095.3	tg_qn+lnfi+whr_qn	lnfi+tg_qn+whr_qn
uc002clv.2	147	4721	24582	2.72713	0.0185519	2	110	8552.07	8551.87	0.39348	0.821404	-17078.8	-17095.3	tg_qn+lnfi	lnfi+tg_qn
uc002clv.2	147	4721	24582	2.72713	0.0185519	2	101	8552.01	8551.87	0.277333	0.870518	-17078.6	-17095.3	tg_qn+whr_qn	tg_qn+whr_qn
uc002clv.2	147	4721	24582	2.72713	0.0185519	1	100	8551.98	8551.87	0.214695	0.643112	-17087	-17095.3	tg_qn	tg_qn
uc002clv.2	147	4721	24582	2.72713	0.0185519	2	11	8551.94	8551.87	0.122624	0.94053	-17078.5	-17095.3	lnfi+whr_qn	lnfi+whr_qn
uc002clv.2	147	4721	24582	2.72713	0.0185519	1	10	8551.91	8551.87	0.0792507	0.778315	-17086.9	-17095.3	lnfi	lnfi
uc002clv.2	147	4721	24582	2.72713	0.0185519	1	1	8551.9	8551.87	0.0462289	0.82976	-17086.9	-17095.3	whr_qn	whr_qn
uc002clw.2	147	4721	24582	2.72713	0.0185519	3	111	8552.1	8551.87	0.444888	0.930821	-17070.4	-17095.3	tg_qn+lnfi+whr_qn	lnfi+tg_qn+whr_qn
uc002clw.2	147	4721	24582	2.72713	0.0185519	2	110	8552.07	8551.87	0.39348	0.821404	-17078.8	-17095.3	tg_qn+lnfi	lnfi+tg_qn
uc002clw.2	147	4721	24582	2.72713	0.0185519	2	101	8552.01	8551.87	0.277333	0.870518	-17078.6	-17095.3	tg_qn+whr_qn	tg_qn+whr_qn
uc002clw.2	147	4721	24582	2.72713	0.0185519	1	100	8551.98	8551.87	0.214695	0.643112	-17087	-17095.3	tg_qn	tg_qn
uc002clw.2	147	4721	24582	2.72713	0.0185519	2	11	8551.94	8551.87	0.122624	0.94053	-17078.5	-17095.3	lnfi+whr_qn	lnfi+whr_qn
uc002clw.2	147	4721	24582	2.72713	0.0185519	1	10	8551.91	8551.87	0.0792507	0.778315	-17086.9	-17095.3	lnfi	lnfi
uc002clw.2	147	4721	24582	2.72713	0.0185519	1	1	8551.9	8551.87	0.0462289	0.82976	-17086.9	-17095.3	whr_qn	whr_qn
uc010uvf.1	11	4721	1101	0.125655	0.0114232	3	111	10616.4	10615.8	1.12483	0.771085	-21199	-21223.2	tg_qn+lnfi+whr_qn	lnfi+tg_qn+whr_qn
uc010uvf.1	11	4721	1101	0.125655	0.0114232	2	110	10616	10615.8	0.315083	0.854242	-21206.6	-21223.2	tg_qn+lnfi	lnfi+tg_qn
uc010uvf.1	11	4721	1101	0.125655	0.0114232	2	101	10616.4	10615.8	1.07746	0.583488	-21207.4	-21223.2	tg_qn+whr_qn	tg_qn+whr_qn
uc010uvf.1	11	4721	1101	0.125655	0.0114232	1	100	10615.9	10615.8	0.218931	0.639855	-21215	-21223.2	tg_qn	tg_qn
uc010uvf.1	11	4721	1101	0.125655	0.0114232	2	11	10616.2	10615.8	0.725892	0.695624	-21207	-21223.2	lnfi+whr_qn	lnfi+whr_qn
uc010uvf.1	11	4721	1101	0.125655	0.0114232	1	10	10615.9	10615.8	0.0276134	0.868021	-21214.8	-21223.2	lnfi	lnfi
uc010uvf.1	11	4721	1101	0.125655	0.0114232	1	1	10616.2	10615.8	0.700907	0.402479	-21215.5	-21223.2	whr_qn	whr_qn
uc010uvg.1	32	4721	952	0.105755	0.00330483	3	111	15180	15177.8	4.55028	0.207849	-30326.2	-30347.1	tg_qn+lnfi+whr_qn	lnfi+tg_qn+whr_qn
uc010uvg.1	32	4721	952	0.105755	0.00330483	2	110	15179.1	15177.8	2.71342	0.257507	-30332.9	-30347.1	tg_qn+lnfi	lnfi+tg_qn
uc010uvg.1	32	4721	952	0.105755	0.00330483	2	101	15179	15177.8	2.47588	0.289982	-30332.6	-30347.1	tg_qn+whr_qn	tg_qn+whr_qn
uc010uvg.1	32	4721	952	0.105755	0.00330483	1	100	15177.8	15177.8	0.0459258	0.830311	-30338.7	-30347.1	tg_qn	tg_qn
uc010uvg.1	32	4721	952	0.105755	0.00330483	2	11	15179.8	15177.8	4.13599	0.126439	-30334.3	-30347.1	lnfi+whr_qn	lnfi+whr_qn
uc010uvg.1	32	4721	952	0.105755	0.00330483	1	10	15179	15177.8	2.47036	0.116011	-30341.1	-30347.1	lnfi	lnfi
uc010uvg.1	32	4721	952	0.105755	0.00330483	1	1	15179	15177.8	2.43101	0.118957	-30341	-30347.1	whr_qn	whr_qn
uc002cly.2	87	4721	6181	0.683118	0.00785193	3	111	12694.7	12693.8	1.78126	0.619022	-25355.5	-25379.1	tg_qn+lnfi+whr_qn	lnfi+tg_qn+whr_qn
uc002cly.2	87	4721	6181	0.683118	0.00785193	2	110	12694.4	12693.8	1.29897	0.522314	-25363.5	-25379.1	tg_qn+lnfi	lnfi+tg_qn
uc002cly.2	87	4721	6181	0.683118	0.00785193	2	101	12694.3	12693.8	1.11523	0.572573	-25363.3	-25379.1	tg_qn+whr_qn	tg_qn+whr_qn
uc002cly.2	87	4721	6181	0.683118	0.00785193	1	100	12694	12693.8	0.47174	0.492188	-25371.1	-25379.1	tg_qn	tg_qn
uc002cly.2	87	4721	6181	0.683118	0.00785193	2	11	12694.6	12693.8	1.69226	0.429073	-25363.9	-25379.1	lnfi+whr_qn	lnfi+whr_qn
uc002cly.2	87	4721	6181	0.683118	0.00785193	1	10	12694.4	12693.8	1.17087	0.279222	-25371.8	-25379.1	lnfi	lnfi
uc002cly.2	87	4721	6181	0.683118	0.00785193	1	1	12694.2	12693.8	0.813618	0.367053	-25371.5	-25379.1	whr_qn	whr_qn
uc010brs.1	1	4721	169	0.018062	0.018062	3	111	5587.05	5585.72	2.65471	0.447979	-11140.3	-11163	tg_qn+lnfi+whr_qn	lnfi+tg_qn+whr_qn
uc010brs.1	1	4721	169	0.018062	0.018062	2	110	5586.33	5585.72	1.20567	0.547258	-11147.3	-11163	tg_qn+lnfi	lnfi+tg_qn
uc010brs.1	1	4721	169	0.018062	0.018062	2	101	5587.03	5585.72	2.60816	0.271422	-11148.7	-11163	tg_qn+whr_qn	tg_qn+whr_qn
uc010brs.1	1	4721	169	0.018062	0.018062	1	100	5586.25	5585.72	1.06124	0.302932	-11155.6	-11163	tg_qn	tg_qn
uc010brs.1	1	4721	169	0.018062	0.018062	2	11	5586.83	5585.72	2.20585	0.331899	-11148.3	-11163	lnfi+whr_qn	lnfi+whr_qn
uc010brs.1	1	4721	169	0.018062	0.018062	1	10	5585.99	5585.72	0.53383	0.465001	-11155.1	-11163	lnfi	lnfi
uc010brs.1	1	4721	169	0.018062	0.018062	1	1	5586.71	5585.72	1.97888	0.159508	-11156.5	-11163	whr_qn	whr_qn
uc002cmc.2	124	4721	9675	1.06183	0.00856312	3	111	13507.8	13504.5	6.47951	0.0904741	-26981.7	-27000.6	tg_qn+lnfi+whr_qn	lnfi+tg_qn+whr_qn
uc002cmc.2	124	4721	9675	1.06183	0.00856312	2	110	13505	13504.5	0.896284	0.638814	-26984.6	-27000.6	tg_qn+lnfi	lnfi+tg_qn
uc002cmc.2	124	4721	9675	1.06183	0.00856312	2	101	13507.8	13504.5	6.46102	0.0395373	-26990.2	-27000.6	tg_qn+whr_qn	tg_qn+whr_qn
uc002cmc.2	124	4721	9675	1.06183	0.00856312	1	100	13504.9	13504.5	0.792154	0.37345	-26993	-27000.6	tg_qn	tg_qn
uc002cmc.2	124	4721	9675	1.06183	0.00856312	2	11	13507.7	13504.5	6.27976	0.0432881	-26990	-27000.6	lnfi+whr_qn	lnfi+whr_qn
uc002cmc.2	124	4721	9675	1.06183	0.00856312	1	10	13504.7	13504.5	0.37107	0.542422	-26992.5	-27000.6	lnfi	lnfi
uc002cmc.2	124	4721	9675	1.06183	0.00856312	1	1	13507.7	13504.5	6.24455	0.0124576	-26998.4	-27000.6	whr_qn	whr_qn
uc002cmd.2	101	4721	7998	0.87675	0.00868069	3	111	13075.9	13072.6	6.61381	0.0852806	-26117.9	-26136.7	tg_qn+lnfi+whr_qn	lnfi+tg_qn+whr_qn
uc002cmd.2	101	4721	7998	0.87675	0.00868069	2	110	13073.2	13072.6	1.24279	0.537195	-26121	-26136.7	tg_qn+lnfi	lnfi+tg_qn
uc002cmd.2	101	4721	7998	0.87675	0.00868069	2	101	13075.9	13072.6	6.5958	0.0369607	-26126.3	-26136.7	tg_qn+whr_qn	tg_qn+whr_qn
uc002cmd.2	101	4721	7998	0.87675	0.00868069	1	100	13073.1	13072.6	1.14201	0.285228	-26129.3	-26136.7	tg_qn	tg_qn
uc002cmd.2	101	4721	7998	0.87675	0.00868069	2	11	13075.7	13072.6	6.23603	0.0442448	-26126	-26136.7	lnfi+whr_qn	lnfi+whr_qn
uc002cmd.2	101	4721	7998	0.87675	0.00868069	1	10	13072.8	13072.6	0.447269	0.503635	-26128.7	-26136.7	lnfi	lnfi
uc002cmd.2	101	4721	7998	0.87675	0.00868069	1	1	13075.7	13072.6	6.18004	0.01292	-26134.4	-26136.7	whr_qn	whr_qn
uc010brr.1	99	4721	7993	0.876214	0.00885065	3	111	12979.9	12976.6	6.55194	0.0876365	-25925.9	-25944.7	tg_qn+lnfi+whr_qn	lnfi+tg_qn+whr_qn
uc010brr.1	99	4721	7993	0.876214	0.00885065	2	110	12977.2	12976.6	1.25451	0.534054	-25929.1	-25944.7	tg_qn+lnfi	lnfi+tg_qn
uc010brr.1	99	4721	7993	0.876214	0.00885065	2	101	12979.9	12976.6	6.53361	0.0381281	-25934.4	-25944.7	tg_qn+whr_qn	tg_qn+whr_qn
uc010brr.1	99	4721	7993	0.876214	0.00885065	1	100	12977.2	12976.6	1.1557	0.282359	-25937.4	-25944.7	tg_qn	tg_qn
uc010brr.1	99	4721	7993	0.876214	0.00885065	2	11	12979.7	12976.6	6.16281	0.0458947	-25934	-25944.7	lnfi+whr_qn	lnfi+whr_qn
uc010brr.1	99	4721	7993	0.876214	0.00885065	1	10	12976.8	12976.6	0.445814	0.504329	-25936.7	-25944.7	lnfi	lnfi
uc010brr.1	99	4721	7993	0.876214	0.00885065	1	1	12979.7	12976.6	6.10597	0.0134726	-25942.4	-25944.7	whr_qn	whr_qn
uc002clz.2	322	4721	27666	3.03071	0.00941215	3	111	13165.4	13163.4	4.05004	0.256111	-26297	-26318.3	tg_qn+lnfi+whr_qn	lnfi+tg_qn+whr_qn
uc002clz.2	322	4721	27666	3.03071	0.00941215	2	110	13163.9	13163.4	0.90226	0.636908	-26302.3	-26318.3	tg_qn+lnfi	lnfi+tg_qn
uc002clz.2	322	4721	27666	3.03071	0.00941215	2	101	13165.4	13163.4	3.94888	0.138839	-26305.4	-26318.3	tg_qn+whr_qn	tg_qn+whr_qn
uc002clz.2	322	4721	27666	3.03071	0.00941215	1	100	13163.8	13163.4	0.881212	0.34787	-26310.8	-26318.3	tg_qn	tg_qn
uc002clz.2	322	4721	27666	3.03071	0.00941215	2	11	13165.2	13163.4	3.58594	0.166465	-26305	-26318.3	lnfi+whr_qn	lnfi+whr_qn
uc002clz.2	322	4721	27666	3.03071	0.00941215	1	10	13163.5	13163.4	0.10124	0.750347	-26310	-26318.3	lnfi	lnfi
uc002clz.2	322	4721	27666	3.03071	0.00941215	1	1	13165.2	13163.4	3.56442	0.0590304	-26313.4	-26318.3	whr_qn	whr_qn
uc002cmb.2	415	4721	37345	4.09157	0.00985921	3	111	13003.3	13001.1	4.48202	0.2139	-25972.8	-25993.7	tg_qn+lnfi+whr_qn	lnfi+tg_qn+whr_qn
uc002cmb.2	415	4721	37345	4.09157	0.00985921	2	110	13001.5	13001.1	0.90189	0.637026	-25977.7	-25993.7	tg_qn+lnfi	lnfi+tg_qn
uc002cmb.2	415	4721	37345	4.09157	0.00985921	2	101	13003.2	13001.1	4.15883	0.125004	-25981	-25993.7	tg_qn+whr_qn	tg_qn+whr_qn
uc002cmb.2	415	4721	37345	4.09157	0.00985921	1	100	13001.5	13001.1	0.790952	0.373813	-25986.1	-25993.7	tg_qn	tg_qn
uc002cmb.2	415	4721	37345	4.09157	0.00985921	2	11	13003.1	13001.1	3.97595	0.136972	-25980.8	-25993.7	lnfi+whr_qn	lnfi+whr_qn
uc002cmb.2	415	4721	37345	4.09157	0.00985921	1	10	13001.1	13001.1	0.0191606	0.889907	-25985.3	-25993.7	lnfi	lnfi
uc002cmb.2	415	4721	37345	4.09157	0.00985921	1	1	13003	13001.1	3.84767	0.049815	-25989.1	-25993.7	whr_qn	whr_qn
uc010uvh.1	208	4721	6800	0.745657	0.00358489	3	111	17033	17032.8	0.379939	0.944355	-34032.1	-34057.1	tg_qn+lnfi+whr_qn	lnfi+tg_qn+whr_qn
uc010uvh.1	208	4721	6800	0.745657	0.00358489	2	110	17032.9	17032.8	0.356742	0.836632	-34040.5	-34057.1	tg_qn+lnfi	lnfi+tg_qn
uc010uvh.1	208	4721	6800	0.745657	0.00358489	2	101	17032.9	17032.8	0.343095	0.84236	-34040.5	-34057.1	tg_qn+whr_qn	tg_qn+whr_qn
uc010uvh.1	208	4721	6800	0.745657	0.00358489	1	100	17032.9	17032.8	0.32073	0.571169	-34048.9	-34057.1	tg_qn	tg_qn
uc010uvh.1	208	4721	6800	0.745657	0.00358489	2	11	17032.8	17032.8	0.141696	0.931604	-34040.3	-34057.1	lnfi+whr_qn	lnfi+whr_qn
uc010uvh.1	208	4721	6800	0.745657	0.00358489	1	10	17032.8	17032.8	0.118915	0.730214	-34048.7	-34057.1	lnfi	lnfi
uc010uvh.1	208	4721	6800	0.745657	0.00358489	1	1	17032.8	17032.8	0.0285723	0.86577	-34048.6	-34057.1	whr_qn	whr_qn
uc002cmf.2	177	4721	6278	0.687899	0.00388644	3	111	17090.8	17090.4	0.761955	0.858544	-34147.8	-34172.4	tg_qn+lnfi+whr_qn	lnfi+tg_qn+whr_qn
uc002cmf.2	177	4721	6278	0.687899	0.00388644	2	110	17090.6	17090.4	0.456014	0.796119	-34155.9	-34172.4	tg_qn+lnfi	lnfi+tg_qn
uc002cmf.2	177	4721	6278	0.687899	0.00388644	2	101	17090.8	17090.4	0.696003	0.706098	-34156.2	-34172.4	tg_qn+whr_qn	tg_qn+whr_qn
uc002cmf.2	177	4721	6278	0.687899	0.00388644	1	100	17090.6	17090.4	0.414749	0.519569	-34164.3	-34172.4	tg_qn	tg_qn
uc002cmf.2	177	4721	6278	0.687899	0.00388644	2	11	17090.6	17090.4	0.391685	0.822142	-34155.9	-34172.4	lnfi+whr_qn	lnfi+whr_qn
uc002cmf.2	177	4721	6278	0.687899	0.00388644	1	10	17090.5	17090.4	0.152594	0.696069	-34164.1	-34172.4	lnfi	lnfi
uc002cmf.2	177	4721	6278	0.687899	0.00388644	1	1	17090.5	17090.4	0.174338	0.676285	-34164.1	-34172.4	whr_qn	whr_qn
uc002cmg.2	64	4721	3320	0.363585	0.00568101	3	111	17229.6	17225.3	8.66373	0.0341126	-34425.3	-34442.1	tg_qn+lnfi+whr_qn	lnfi+tg_qn+whr_qn
uc002cmg.2	64	4721	3320	0.363585	0.00568101	2	110	17226.9	17225.3	3.341	0.188153	-34428.5	-34442.1	tg_qn+lnfi	lnfi+tg_qn
uc002cmg.2	64	4721	3320	0.363585	0.00568101	2	101	17228.5	17225.3	6.4	0.0407621	-34431.5	-34442.1	tg_qn+whr_qn	tg_qn+whr_qn
uc002cmg.2	64	4721	3320	0.363585	0.00568101	1	100	17226.2	17225.3	1.87943	0.170399	-34435.5	-34442.1	tg_qn	tg_qn
uc002cmg.2	64	4721	3320	0.363585	0.00568101	2	11	17229	17225.3	7.43925	0.0242431	-34432.6	-34442.1	lnfi+whr_qn	lnfi+whr_qn
uc002cmg.2	64	4721	3320	0.363585	0.00568101	1	10	17226.6	17225.3	2.63825	0.104318	-34436.2	-34442.1	lnfi	lnfi
uc002cmg.2	64	4721	3320	0.363585	0.00568101	1	1	17227	17225.3	3.42194	0.0643355	-34437	-34442.1	whr_qn	whr_qn
uc010uvi.1	64	4721	3320	0.363585	0.00568101	3	111	17229.6	17225.3	8.66373	0.0341126	-34425.3	-34442.1	tg_qn+lnfi+whr_qn	lnfi+tg_qn+whr_qn
uc010uvi.1	64	4721	3320	0.363585	0.00568101	2	110	17226.9	17225.3	3.341	0.188153	-34428.5	-34442.1	tg_qn+lnfi	lnfi+tg_qn
uc010uvi.1	64	4721	3320	0.363585	0.00568101	2	101	17228.5	17225.3	6.4	0.0407621	-34431.5	-34442.1	tg_qn+whr_qn	tg_qn+whr_qn
uc010uvi.1	64	4721	3320	0.363585	0.00568101	1	100	17226.2	17225.3	1.87943	0.170399	-34435.5	-34442.1	tg_qn	tg_qn
uc010uvi.1	64	4721	3320	0.363585	0.00568101	2	11	17229	17225.3	7.43925	0.0242431	-34432.6	-34442.1	lnfi+whr_qn	lnfi+whr_qn
uc010uvi.1	64	4721	3320	0.363585	0.00568101	1	10	17226.6	17225.3	2.63825	0.104318	-34436.2	-34442.1	lnfi	lnfi
uc010uvi.1	64	4721	3320	0.363585	0.00568101	1	1	17227	17225.3	3.42194	0.0643355	-34437	-34442.1	whr_qn	whr_qn
uc010brt.2	64	4721	3320	0.363585	0.00568101	3	111	17229.6	17225.3	8.66373	0.0341126	-34425.3	-34442.1	tg_qn+lnfi+whr_qn	lnfi+tg_qn+whr_qn
uc010brt.2	64	4721	3320	0.363585	0.00568101	2	110	17226.9	17225.3	3.341	0.188153	-34428.5	-34442.1	tg_qn+lnfi	lnfi+tg_qn
uc010brt.2	64	4721	3320	0.363585	0.00568101	2	101	17228.5	17225.3	6.4	0.0407621	-34431.5	-34442.1	tg_qn+whr_qn	tg_qn+whr_qn
uc010brt.2	64	4721	3320	0.363585	0.00568101	1	100	17226.2	17225.3	1.87943	0.170399	-34435.5	-34442.1	tg_qn	tg_qn
uc010brt.2	64	4721	3320	0.363585	0.00568101	2	11	17229	17225.3	7.43925	0.0242431	-34432.6	-34442.1	lnfi+whr_qn	lnfi+whr_qn
uc010brt.2	64	4721	3320	0.363585	0.00568101	1	10	17226.6	17225.3	2.63825	0.104318	-34436.2	-34442.1	lnfi	lnfi
uc010brt.2	64	4721	3320	0.363585	0.00568101	1	1	17227	17225.3	3.42194	0.0643355	-34437	-34442.1	whr_qn	whr_qn
uc010bru.2	64	4721	3320	0.363585	0.00568101	3	111	17229.6	17225.3	8.66373	0.0341126	-34425.3	-34442.1	tg_qn+lnfi+whr_qn	lnfi+tg_qn+whr_qn
uc010bru.2	64	4721	3320	0.363585	0.00568101	2	110	17226.9	17225.3	3.341	0.188153	-34428.5	-34442.1	tg_qn+lnfi	lnfi+tg_qn
uc010bru.2	64	4721	3320	0.363585	0.00568101	2	101	17228.5	17225.3	6.4	0.0407621	-34431.5	-34442.1	tg_qn+whr_qn	tg_qn+whr_qn
uc010bru.2	64	4721	3320	0.363585	0.00568101	1	100	17226.2	17225.3	1.87943	0.170399	-34435.5	-34442.1	tg_qn	tg_qn
uc010bru.2	64	4721	3320	0.363585	0.00568101	2	11	17229	17225.3	7.43925	0.0242431	-34432.6	-34442.1	lnfi+whr_qn	lnfi+whr_qn
uc010bru.2	64	4721	3320	0.363585	0.00568101	1	10	17226.6	17225.3	2.63825	0.104318	-34436.2	-34442.1	lnfi	lnfi
uc010bru.2	64	4721	3320	0.363585	0.00568101	1	1	17227	17225.3	3.42194	0.0643355	-34437	-34442.1	whr_qn	whr_qn
uc010uvj.1	64	4721	3320	0.363585	0.00568101	3	111	17229.6	17225.3	8.66373	0.0341126	-34425.3	-34442.1	tg_qn+lnfi+whr_qn	lnfi+tg_qn+whr_qn
uc010uvj.1	64	4721	3320	0.363585	0.00568101	2	110	17226.9	17225.3	3.341	0.188153	-34428.5	-34442.1	tg_qn+lnfi	lnfi+tg_qn
uc010uvj.1	64	4721	3320	0.363585	0.00568101	2	101	17228.5	17225.3	6.4	0.0407621	-34431.5	-34442.1	tg_qn+whr_qn	tg_qn+whr_qn
uc010uvj.1	64	4721	3320	0.363585	0.00568101	1	100	17226.2	17225.3	1.87943	0.170399	-34435.5	-34442.1	tg_qn	tg_qn
uc010uvj.1	64	4721	3320	0.363585	0.00568101	2	11	17229	17225.3	7.43925	0.0242431	-34432.6	-34442.1	lnfi+whr_qn	lnfi+whr_qn
uc010uvj.1	64	4721	3320	0.363585	0.00568101	1	10	17226.6	17225.3	2.63825	0.104318	-34436.2	-34442.1	lnfi	lnfi
uc010uvj.1	64	4721	3320	0.363585	0.00568101	1	1	17227	17225.3	3.42194	0.0643355	-34437	-34442.1	whr_qn	whr_qn
uc010uvk.1	58	4721	3127	0.342978	0.00591341	3	111	17061.8	17057.9	7.77948	0.0507961	-34089.8	-34107.4	tg_qn+lnfi+whr_qn	lnfi+tg_qn+whr_qn
uc010uvk.1	58	4721	3127	0.342978	0.00591341	2	110	17059	17057.9	2.14162	0.342731	-34092.6	-34107.4	tg_qn+lnfi	lnfi+tg_qn
uc010uvk.1	58	4721	3127	0.342978	0.00591341	2	101	17061.1	17057.9	6.32762	0.0422643	-34096.8	-34107.4	tg_qn+whr_qn	tg_qn+whr_qn
uc010uvk.1	58	4721	3127	0.342978	0.00591341	1	100	17058.6	17057.9	1.33463	0.247982	-34100.3	-34107.4	tg_qn	tg_qn
uc010uvk.1	58	4721	3127	0.342978	0.00591341	2	11	17061.3	17057.9	6.72256	0.0346908	-34097.2	-34107.4	lnfi+whr_qn	lnfi+whr_qn
uc010uvk.1	58	4721	3127	0.342978	0.00591341	1	10	17058.7	17057.9	1.5769	0.209208	-34100.5	-34107.4	lnfi	lnfi
uc010uvk.1	58	4721	3127	0.342978	0.00591341	1	1	17059.9	17057.9	3.97946	0.0460585	-34102.9	-34107.4	whr_qn	whr_qn
uc002cmi.1	131	4721	6450	0.713282	0.0054449	3	111	16574.1	16572.8	2.66859	0.445592	-33114.5	-33137.2	tg_qn+lnfi+whr_qn	lnfi+tg_qn+whr_qn
uc002cmi.1	131	4721	6450	0.713282	0.0054449	2	110	16573.6	16572.8	1.62539	0.443662	-33121.9	-33137.2	tg_qn+lnfi	lnfi+tg_qn
uc002cmi.1	131	4721	6450	0.713282	0.0054449	2	101	16573.4	16572.8	1.14775	0.563339	-33121.4	-33137.2	tg_qn+whr_qn	tg_qn+whr_qn
uc002cmi.1	131	4721	6450	0.713282	0.0054449	1	100	16573	16572.8	0.394964	0.529702	-33129.1	-33137.2	tg_qn	tg_qn
uc002cmi.1	131	4721	6450	0.713282	0.0054449	2	11	16574.1	16572.8	2.5677	0.276969	-33122.8	-33137.2	lnfi+whr_qn	lnfi+whr_qn
uc002cmi.1	131	4721	6450	0.713282	0.0054449	1	10	16573.6	16572.8	1.57876	0.208939	-33130.3	-33137.2	lnfi	lnfi
uc002cmi.1	131	4721	6450	0.713282	0.0054449	1	1	16573.1	16572.8	0.558591	0.454829	-33129.3	-33137.2	whr_qn	whr_qn
uc002cmj.1	132	4721	6457	0.714024	0.00540928	3	111	16608	16606.6	2.75185	0.431488	-33182.2	-33204.8	tg_qn+lnfi+whr_qn	lnfi+tg_qn+whr_qn
uc002cmj.1	132	4721	6457	0.714024	0.00540928	2	110	16607.5	16606.6	1.6685	0.434201	-33189.6	-33204.8	tg_qn+lnfi	lnfi+tg_qn
uc002cmj.1	132	4721	6457	0.714024	0.00540928	2	101	16607.2	16606.6	1.1964	0.5498	-33189.1	-33204.8	tg_qn+whr_qn	tg_qn+whr_qn
uc002cmj.1	132	4721	6457	0.714024	0.00540928	1	100	16606.8	16606.6	0.412611	0.520647	-33196.8	-33204.8	tg_qn	tg_qn
uc002cmj.1	132	4721	6457	0.714024	0.00540928	2	11	16608	16606.6	2.64441	0.266546	-33190.5	-33204.8	lnfi+whr_qn	lnfi+whr_qn
uc002cmj.1	132	4721	6457	0.714024	0.00540928	1	10	16607.4	16606.6	1.61888	0.203249	-33198	-33204.8	lnfi	lnfi
uc002cmj.1	132	4721	6457	0.714024	0.00540928	1	1	16606.9	16606.6	0.580946	0.445942	-33196.9	-33204.8	whr_qn	whr_qn
uc002cmk.2	201	4721	9118	1.01424	0.00504598	3	111	17769.7	17768.8	1.92599	0.587909	-35505.6	-35529.1	tg_qn+lnfi+whr_qn	lnfi+tg_qn+whr_qn
uc002cmk.2	201	4721	9118	1.01424	0.00504598	2	110	17769.3	17768.8	1.08171	0.58225	-35513.2	-35529.1	tg_qn+lnfi	lnfi+tg_qn
uc002cmk.2	201	4721	9118	1.01424	0.00504598	2	101	17769.7	17768.8	1.90317	0.386128	-35514.1	-35529.1	tg_qn+whr_qn	tg_qn+whr_qn
uc002cmk.2	201	4721	9118	1.01424	0.00504598	1	100	17769.3	17768.8	1.06525	0.302021	-35521.7	-35529.1	tg_qn	tg_qn
uc002cmk.2	201	4721	9118	1.01424	0.00504598	2	11	17769.2	17768.8	0.770442	0.6803	-35512.9	-35529.1	lnfi+whr_qn	lnfi+whr_qn
uc002cmk.2	201	4721	9118	1.01424	0.00504598	1	10	17768.8	17768.8	0.132913	0.715431	-35520.8	-35529.1	lnfi	lnfi
uc002cmk.2	201	4721	9118	1.01424	0.00504598	1	1	17769	17768.8	0.521046	0.470396	-35521.1	-35529.1	whr_qn	whr_qn
uc002cml.2	201	4721	9118	1.01424	0.00504598	3	111	17769.7	17768.8	1.92599	0.587909	-35505.6	-35529.1	tg_qn+lnfi+whr_qn	lnfi+tg_qn+whr_qn
uc002cml.2	201	4721	9118	1.01424	0.00504598	2	110	17769.3	17768.8	1.08171	0.58225	-35513.2	-35529.1	tg_qn+lnfi	lnfi+tg_qn
uc002cml.2	201	4721	9118	1.01424	0.00504598	2	101	17769.7	17768.8	1.90317	0.386128	-35514.1	-35529.1	tg_qn+whr_qn	tg_qn+whr_qn
uc002cml.2	201	4721	9118	1.01424	0.00504598	1	100	17769.3	17768.8	1.06525	0.302021	-35521.7	-35529.1	tg_qn	tg_qn
uc002cml.2	201	4721	9118	1.01424	0.00504598	2	11	17769.2	17768.8	0.770442	0.6803	-35512.9	-35529.1	lnfi+whr_qn	lnfi+whr_qn
uc002cml.2	201	4721	9118	1.01424	0.00504598	1	10	17768.8	17768.8	0.132913	0.715431	-35520.8	-35529.1	lnfi	lnfi
uc002cml.2	201	4721	9118	1.01424	0.00504598	1	1	17769	17768.8	0.521046	0.470396	-35521.1	-35529.1	whr_qn	whr_qn
uc010uvl.1	201	4721	9118	1.01424	0.00504598	3	111	17769.7	17768.8	1.92599	0.587909	-35505.6	-35529.1	tg_qn+lnfi+whr_qn	lnfi+tg_qn+whr_qn
uc010uvl.1	201	4721	9118	1.01424	0.00504598	2	110	17769.3	17768.8	1.08171	0.58225	-35513.2	-35529.1	tg_qn+lnfi	lnfi+tg_qn
uc010uvl.1	201	4721	9118	1.01424	0.00504598	2	101	17769.7	17768.8	1.90317	0.386128	-35514.1	-35529.1	tg_qn+whr_qn	tg_qn+whr_qn
uc010uvl.1	201	4721	9118	1.01424	0.00504598	1	100	17769.3	17768.8	1.06525	0.302021	-35521.7	-35529.1	tg_qn	tg_qn
uc010uvl.1	201	4721	9118	1.01424	0.00504598	2	11	17769.2	17768.8	0.770442	0.6803	-35512.9	-35529.1	lnfi+whr_qn	lnfi+whr_qn
uc010uvl.1	201	4721	9118	1.01424	0.00504598	1	10	17768.8	17768.8	0.132913	0.715431	-35520.8	-35529.1	lnfi	lnfi
uc010uvl.1	201	4721	9118	1.01424	0.00504598	1	1	17769	17768.8	0.521046	0.470396	-35521.1	-35529.1	whr_qn	whr_qn
uc002cmm.2	6	4721	14	0.00149477	0.000249128	3	111	19846.6	19845.2	2.67462	0.444558	-39659.3	-39682	tg_qn+lnfi+whr_qn	lnfi+tg_qn+whr_qn
uc002cmm.2	6	4721	14	0.00149477	0.000249128	2	110	19845.8	19845.2	1.13035	0.568259	-39666.2	-39682	tg_qn+lnfi	lnfi+tg_qn
uc002cmm.2	6	4721	14	0.00149477	0.000249128	2	101	19846.3	19845.2	2.08113	0.353255	-39667.1	-39682	tg_qn+whr_qn	tg_qn+whr_qn
uc002cmm.2	6	4721	14	0.00149477	0.000249128	1	100	19845.3	19845.2	0.239262	0.62474	-39673.7	-39682	tg_qn	tg_qn
uc002cmm.2	6	4721	14	0.00149477	0.000249128	2	11	19846.5	19845.2	2.67387	0.26265	-39667.7	-39682	lnfi+whr_qn	lnfi+whr_qn
uc002cmm.2	6	4721	14	0.00149477	0.000249128	1	10	19845.8	19845.2	1.11863	0.290215	-39674.6	-39682	lnfi	lnfi
uc002cmm.2	6	4721	14	0.00149477	0.000249128	1	1	19846.2	19845.2	2.02348	0.154884	-39675.5	-39682	whr_qn	whr_qn
uc010brv.2	6	4721	14	0.00149477	0.000249128	3	111	19846.6	19845.2	2.67462	0.444558	-39659.3	-39682	tg_qn+lnfi+whr_qn	lnfi+tg_qn+whr_qn
uc010brv.2	6	4721	14	0.00149477	0.000249128	2	110	19845.8	19845.2	1.13035	0.568259	-39666.2	-39682	tg_qn+lnfi	lnfi+tg_qn
uc010brv.2	6	4721	14	0.00149477	0.000249128	2	101	19846.3	19845.2	2.08113	0.353255	-39667.1	-39682	tg_qn+whr_qn	tg_qn+whr_qn
uc010brv.2	6	4721	14	0.00149477	0.000249128	1	100	19845.3	19845.2	0.239262	0.62474	-39673.7	-39682	tg_qn	tg_qn
uc010brv.2	6	4721	14	0.00149477	0.000249128	2	11	19846.5	19845.2	2.67387	0.26265	-39667.7	-39682	lnfi+whr_qn	lnfi+whr_qn
uc010brv.2	6	4721	14	0.00149477	0.000249128	1	10	19845.8	19845.2	1.11863	0.290215	-39674.6	-39682	lnfi	lnfi
uc010brv.2	6	4721	14	0.00149477	0.000249128	1	1	19846.2	19845.2	2.02348	0.154884	-39675.5	-39682	whr_qn	whr_qn
uc002cmn.2	6	4721	78	0.00844263	0.00140711	3	111	15770.5	15770.1	0.896412	0.826294	-31507.2	-31531.7	tg_qn+lnfi+whr_qn	lnfi+tg_qn+whr_qn
uc002cmn.2	6	4721	78	0.00844263	0.00140711	2	110	15770.3	15770.1	0.326242	0.849488	-31515.1	-31531.7	tg_qn+lnfi	lnfi+tg_qn
uc002cmn.2	6	4721	78	0.00844263	0.00140711	2	101	15770.3	15770.1	0.480658	0.786369	-31515.3	-31531.7	tg_qn+whr_qn	tg_qn+whr_qn
uc002cmn.2	6	4721	78	0.00844263	0.00140711	1	100	15770.1	15770.1	0.021659	0.882998	-31523.3	-31531.7	tg_qn	tg_qn
uc002cmn.2	6	4721	78	0.00844263	0.00140711	2	11	15770.5	15770.1	0.885222	0.642357	-31515.7	-31531.7	lnfi+whr_qn	lnfi+whr_qn
uc002cmn.2	6	4721	78	0.00844263	0.00140711	1	10	15770.2	15770.1	0.304818	0.580878	-31523.6	-31531.7	lnfi	lnfi
uc002cmn.2	6	4721	78	0.00844263	0.00140711	1	1	15770.3	15770.1	0.421045	0.516416	-31523.7	-31531.7	whr_qn	whr_qn
uc002cmo.2	7	4721	88	0.00958811	0.00136973	3	111	16194.8	16194.4	0.827099	0.842975	-32355.8	-32380.3	tg_qn+lnfi+whr_qn	lnfi+tg_qn+whr_qn
uc002cmo.2	7	4721	88	0.00958811	0.00136973	2	110	16194.7	16194.4	0.619224	0.733732	-32364	-32380.3	tg_qn+lnfi	lnfi+tg_qn
uc002cmo.2	7	4721	88	0.00958811	0.00136973	2	101	16194.5	16194.4	0.174384	0.916501	-32363.6	-32380.3	tg_qn+whr_qn	tg_qn+whr_qn
uc002cmo.2	7	4721	88	0.00958811	0.00136973	1	100	16194.4	16194.4	0.0465869	0.829113	-32371.9	-32380.3	tg_qn	tg_qn
uc002cmo.2	7	4721	88	0.00958811	0.00136973	2	11	16194.7	16194.4	0.664687	0.717241	-32364.1	-32380.3	lnfi+whr_qn	lnfi+whr_qn
uc002cmo.2	7	4721	88	0.00958811	0.00136973	1	10	16194.6	16194.4	0.409135	0.522409	-32372.3	-32380.3	lnfi	lnfi
uc002cmo.2	7	4721	88	0.00958811	0.00136973	1	1	16194.5	16194.4	0.14879	0.699695	-32372	-32380.3	whr_qn	whr_qn
uc002cmp.1	7	4721	88	0.00958811	0.00136973	3	111	16194.8	16194.4	0.827099	0.842975	-32355.8	-32380.3	tg_qn+lnfi+whr_qn	lnfi+tg_qn+whr_qn
uc002cmp.1	7	4721	88	0.00958811	0.00136973	2	110	16194.7	16194.4	0.619224	0.733732	-32364	-32380.3	tg_qn+lnfi	lnfi+tg_qn
uc002cmp.1	7	4721	88	0.00958811	0.00136973	2	101	16194.5	16194.4	0.174384	0.916501	-32363.6	-32380.3	tg_qn+whr_qn	tg_qn+whr_qn
uc002cmp.1	7	4721	88	0.00958811	0.00136973	1	100	16194.4	16194.4	0.0465869	0.829113	-32371.9	-32380.3	tg_qn	tg_qn
uc002cmp.1	7	4721	88	0.00958811	0.00136973	2	11	16194.7	16194.4	0.664687	0.717241	-32364.1	-32380.3	lnfi+whr_qn	lnfi+whr_qn
uc002cmp.1	7	4721	88	0.00958811	0.00136973	1	10	16194.6	16194.4	0.409135	0.522409	-32372.3	-32380.3	lnfi	lnfi
uc002cmp.1	7	4721	88	0.00958811	0.00136973	1	1	16194.5	16194.4	0.14879	0.699695	-32372	-32380.3	whr_qn	whr_qn
uc002cmq.1	10	4721	263	0.0286961	0.00286961	3	111	15406.9	15404.5	4.76662	0.189706	-30780	-30800.6	tg_qn+lnfi+whr_qn	lnfi+tg_qn+whr_qn
uc002cmq.1	10	4721	263	0.0286961	0.00286961	2	110	15405.8	15404.5	2.56161	0.277814	-30786.2	-30800.6	tg_qn+lnfi	lnfi+tg_qn
uc002cmq.1	10	4721	263	0.0286961	0.00286961	2	101	15406.7	15404.5	4.42196	0.109593	-30788.1	-30800.6	tg_qn+whr_qn	tg_qn+whr_qn
uc002cmq.1	10	4721	263	0.0286961	0.00286961	1	100	15405.7	15404.5	2.4021	0.121172	-30794.5	-30800.6	tg_qn	tg_qn
uc002cmq.1	10	4721	263	0.0286961	0.00286961	2	11	15405.8	15404.5	2.60238	0.272208	-30786.3	-30800.6	lnfi+whr_qn	lnfi+whr_qn
uc002cmq.1	10	4721	263	0.0286961	0.00286961	1	10	15405	15404.5	0.860982	0.353464	-30793	-30800.6	lnfi	lnfi
uc002cmq.1	10	4721	263	0.0286961	0.00286961	1	1	15405.2	15404.5	1.26704	0.260323	-30793.4	-30800.6	whr_qn	whr_qn
uc010brw.1	10	4721	263	0.0286961	0.00286961	3	111	15406.9	15404.5	4.76662	0.189706	-30780	-30800.6	tg_qn+lnfi+whr_qn	lnfi+tg_qn+whr_qn
uc010brw.1	10	4721	263	0.0286961	0.00286961	2	110	15405.8	15404.5	2.56161	0.277814	-30786.2	-30800.6	tg_qn+lnfi	lnfi+tg_qn
uc010brw.1	10	4721	263	0.0286961	0.00286961	2	101	15406.7	15404.5	4.42196	0.109593	-30788.1	-30800.6	tg_qn+whr_qn	tg_qn+whr_qn
uc010brw.1	10	4721	263	0.0286961	0.00286961	1	100	15405.7	15404.5	2.4021	0.121172	-30794.5	-30800.6	tg_qn	tg_qn
uc010brw.1	10	4721	263	0.0286961	0.00286961	2	11	15405.8	15404.5	2.60238	0.272208	-30786.3	-30800.6	lnfi+whr_qn	lnfi+whr_qn
uc010brw.1	10	4721	263	0.0286961	0.00286961	1	10	15405	15404.5	0.860982	0.353464	-30793	-30800.6	lnfi	lnfi
uc010brw.1	10	4721	263	0.0286961	0.00286961	1	1	15405.2	15404.5	1.26704	0.260323	-30793.4	-30800.6	whr_qn	whr_qn
uc002cmr.2	16	4721	504	0.0567239	0.00354525	3	111	16125.8	16123.2	5.1515	0.161034	-32217.8	-32238	tg_qn+lnfi+whr_qn	lnfi+tg_qn+whr_qn
uc002cmr.2	16	4721	504	0.0567239	0.00354525	2	110	16124	16123.2	1.48253	0.476511	-32222.5	-32238	tg_qn+lnfi	lnfi+tg_qn
uc002cmr.2	16	4721	504	0.0567239	0.00354525	2	101	16125.7	16123.2	4.98705	0.0826182	-32226	-32238	tg_qn+whr_qn	tg_qn+whr_qn
uc002cmr.2	16	4721	504	0.0567239	0.00354525	1	100	16123.7	16123.2	1.04547	0.306553	-32230.6	-32238	tg_qn	tg_qn
uc002cmr.2	16	4721	504	0.0567239	0.00354525	2	11	16124.8	16123.2	3.16532	0.205428	-32224.2	-32238	lnfi+whr_qn	lnfi+whr_qn
uc002cmr.2	16	4721	504	0.0567239	0.00354525	1	10	16123.3	16123.2	0.0669493	0.795832	-32229.6	-32238	lnfi	lnfi
uc002cmr.2	16	4721	504	0.0567239	0.00354525	1	1	16124.8	16123.2	3.14599	0.0761139	-32232.7	-32238	whr_qn	whr_qn
uc002cms.2	16	4721	504	0.0567239	0.00354525	3	111	16125.8	16123.2	5.1515	0.161034	-32217.8	-32238	tg_qn+lnfi+whr_qn	lnfi+tg_qn+whr_qn
uc002cms.2	16	4721	504	0.0567239	0.00354525	2	110	16124	16123.2	1.48253	0.476511	-32222.5	-32238	tg_qn+lnfi	lnfi+tg_qn
uc002cms.2	16	4721	504	0.0567239	0.00354525	2	101	16125.7	16123.2	4.98705	0.0826182	-32226	-32238	tg_qn+whr_qn	tg_qn+whr_qn
uc002cms.2	16	4721	504	0.0567239	0.00354525	1	100	16123.7	16123.2	1.04547	0.306553	-32230.6	-32238	tg_qn	tg_qn
uc002cms.2	16	4721	504	0.0567239	0.00354525	2	11	16124.8	16123.2	3.16532	0.205428	-32224.2	-32238	lnfi+whr_qn	lnfi+whr_qn
uc002cms.2	16	4721	504	0.0567239	0.00354525	1	10	16123.3	16123.2	0.0669493	0.795832	-32229.6	-32238	lnfi	lnfi
uc002cms.2	16	4721	504	0.0567239	0.00354525	1	1	16124.8	16123.2	3.14599	0.0761139	-32232.7	-32238	whr_qn	whr_qn
uc002cmt.2	16	4721	504	0.0567239	0.00354525	3	111	16125.8	16123.2	5.1515	0.161034	-32217.8	-32238	tg_qn+lnfi+whr_qn	lnfi+tg_qn+whr_qn
uc002cmt.2	16	4721	504	0.0567239	0.00354525	2	110	16124	16123.2	1.48253	0.476511	-32222.5	-32238	tg_qn+lnfi	lnfi+tg_qn
uc002cmt.2	16	4721	504	0.0567239	0.00354525	2	101	16125.7	16123.2	4.98705	0.0826182	-32226	-32238	tg_qn+whr_qn	tg_qn+whr_qn
uc002cmt.2	16	4721	504	0.0567239	0.00354525	1	100	16123.7	16123.2	1.04547	0.306553	-32230.6	-32238	tg_qn	tg_qn
uc002cmt.2	16	4721	504	0.0567239	0.00354525	2	11	16124.8	16123.2	3.16532	0.205428	-32224.2	-32238	lnfi+whr_qn	lnfi+whr_qn
uc002cmt.2	16	4721	504	0.0567239	0.00354525	1	10	16123.3	16123.2	0.0669493	0.795832	-32229.6	-32238	lnfi	lnfi
uc002cmt.2	16	4721	504	0.0567239	0.00354525	1	1	16124.8	16123.2	3.14599	0.0761139	-32232.7	-32238	whr_qn	whr_qn
uc002cmu.2	18	4721	512	0.0575795	0.00319886	3	111	16638	16635	6.00172	0.111527	-33242.1	-33261.5	tg_qn+lnfi+whr_qn	lnfi+tg_qn+whr_qn
uc002cmu.2	18	4721	512	0.0575795	0.00319886	2	110	16635.9	16635	1.7359	0.419811	-33246.3	-33261.5	tg_qn+lnfi	lnfi+tg_qn
uc002cmu.2	18	4721	512	0.0575795	0.00319886	2	101	16637.9	16635	5.80406	0.0549117	-33250.4	-33261.5	tg_qn+whr_qn	tg_qn+whr_qn
uc002cmu.2	18	4721	512	0.0575795	0.00319886	1	100	16635.6	16635	1.21568	0.27021	-33254.3	-33261.5	tg_qn	tg_qn
uc002cmu.2	18	4721	512	0.0575795	0.00319886	2	11	16636.8	16635	3.67925	0.158877	-33248.3	-33261.5	lnfi+whr_qn	lnfi+whr_qn
uc002cmu.2	18	4721	512	0.0575795	0.00319886	1	10	16635	16635	0.0796063	0.777832	-33253.1	-33261.5	lnfi	lnfi
uc002cmu.2	18	4721	512	0.0575795	0.00319886	1	1	16636.8	16635	3.66107	0.0556978	-33256.7	-33261.5	whr_qn	whr_qn
uc002cmv.2	18	4721	512	0.0575795	0.00319886	3	111	16638	16635	6.00172	0.111527	-33242.1	-33261.5	tg_qn+lnfi+whr_qn	lnfi+tg_qn+whr_qn
uc002cmv.2	18	4721	512	0.0575795	0.00319886	2	110	16635.9	16635	1.7359	0.419811	-33246.3	-33261.5	tg_qn+lnfi	lnfi+tg_qn
uc002cmv.2	18	4721	512	0.0575795	0.00319886	2	101	16637.9	16635	5.80406	0.0549117	-33250.4	-33261.5	tg_qn+whr_qn	tg_qn+whr_qn
uc002cmv.2	18	4721	512	0.0575795	0.00319886	1	100	16635.6	16635	1.21568	0.27021	-33254.3	-33261.5	tg_qn	tg_qn
uc002cmv.2	18	4721	512	0.0575795	0.00319886	2	11	16636.8	16635	3.67925	0.158877	-33248.3	-33261.5	lnfi+whr_qn	lnfi+whr_qn
uc002cmv.2	18	4721	512	0.0575795	0.00319886	1	10	16635	16635	0.0796063	0.777832	-33253.1	-33261.5	lnfi	lnfi
uc002cmv.2	18	4721	512	0.0575795	0.00319886	1	1	16636.8	16635	3.66107	0.0556978	-33256.7	-33261.5	whr_qn	whr_qn
uc010uvm.1	16	4721	237	0.0262235	0.00163897	3	111	17756.2	17754.6	3.1861	0.363813	-35478.5	-35500.7	tg_qn+lnfi+whr_qn	lnfi+tg_qn+whr_qn
uc010uvm.1	16	4721	237	0.0262235	0.00163897	2	110	17754.7	17754.6	0.129888	0.93712	-35483.9	-35500.7	tg_qn+lnfi	lnfi+tg_qn
uc010uvm.1	16	4721	237	0.0262235	0.00163897	2	101	17756.1	17754.6	3.07501	0.214917	-35486.9	-35500.7	tg_qn+whr_qn	tg_qn+whr_qn
uc010uvm.1	16	4721	237	0.0262235	0.00163897	1	100	17754.7	17754.6	0.112644	0.737154	-35492.4	-35500.7	tg_qn	tg_qn
uc010uvm.1	16	4721	237	0.0262235	0.00163897	2	11	17756.2	17754.6	3.16312	0.205654	-35487	-35500.7	lnfi+whr_qn	lnfi+whr_qn
uc010uvm.1	16	4721	237	0.0262235	0.00163897	1	10	17754.6	17754.6	0.0123134	0.911643	-35492.3	-35500.7	lnfi	lnfi
uc010uvm.1	16	4721	237	0.0262235	0.00163897	1	1	17756.1	17754.6	3.0647	0.0800099	-35495.3	-35500.7	whr_qn	whr_qn
uc002cmw.3	29	4721	1144	0.127544	0.00439806	3	111	15752.7	15749.6	6.05103	0.109154	-31471.5	-31490.8	tg_qn+lnfi+whr_qn	lnfi+tg_qn+whr_qn
uc002cmw.3	29	4721	1144	0.127544	0.00439806	2	110	15750.9	15749.6	2.57108	0.276501	-31476.5	-31490.8	tg_qn+lnfi	lnfi+tg_qn
uc002cmw.3	29	4721	1144	0.127544	0.00439806	2	101	15752.1	15749.6	4.82052	0.0897919	-31478.7	-31490.8	tg_qn+whr_qn	tg_qn+whr_qn
uc002cmw.3	29	4721	1144	0.127544	0.00439806	1	100	15750.5	15749.6	1.81176	0.178297	-31484.2	-31490.8	tg_qn	tg_qn
uc002cmw.3	29	4721	1144	0.127544	0.00439806	2	11	15751.8	15749.6	4.26714	0.118414	-31478.2	-31490.8	lnfi+whr_qn	lnfi+whr_qn
uc002cmw.3	29	4721	1144	0.127544	0.00439806	1	10	15749.7	15749.6	0.11391	0.735736	-31482.5	-31490.8	lnfi	lnfi
uc002cmw.3	29	4721	1144	0.127544	0.00439806	1	1	15751.5	15749.6	3.77943	0.0518864	-31486.1	-31490.8	whr_qn	whr_qn
uc002cmx.3	29	4721	1144	0.127544	0.00439806	3	111	15752.7	15749.6	6.05103	0.109154	-31471.5	-31490.8	tg_qn+lnfi+whr_qn	lnfi+tg_qn+whr_qn
uc002cmx.3	29	4721	1144	0.127544	0.00439806	2	110	15750.9	15749.6	2.57108	0.276501	-31476.5	-31490.8	tg_qn+lnfi	lnfi+tg_qn
uc002cmx.3	29	4721	1144	0.127544	0.00439806	2	101	15752.1	15749.6	4.82052	0.0897919	-31478.7	-31490.8	tg_qn+whr_qn	tg_qn+whr_qn
uc002cmx.3	29	4721	1144	0.127544	0.00439806	1	100	15750.5	15749.6	1.81176	0.178297	-31484.2	-31490.8	tg_qn	tg_qn
uc002cmx.3	29	4721	1144	0.127544	0.00439806	2	11	15751.8	15749.6	4.26714	0.118414	-31478.2	-31490.8	lnfi+whr_qn	lnfi+whr_qn
uc002cmx.3	29	4721	1144	0.127544	0.00439806	1	10	15749.7	15749.6	0.11391	0.735736	-31482.5	-31490.8	lnfi	lnfi
uc002cmx.3	29	4721	1144	0.127544	0.00439806	1	1	15751.5	15749.6	3.77943	0.0518864	-31486.1	-31490.8	whr_qn	whr_qn
uc010brx.2	29	4721	1144	0.127544	0.00439806	3	111	15752.7	15749.6	6.05103	0.109154	-31471.5	-31490.8	tg_qn+lnfi+whr_qn	lnfi+tg_qn+whr_qn
uc010brx.2	29	4721	1144	0.127544	0.00439806	2	110	15750.9	15749.6	2.57108	0.276501	-31476.5	-31490.8	tg_qn+lnfi	lnfi+tg_qn
uc010brx.2	29	4721	1144	0.127544	0.00439806	2	101	15752.1	15749.6	4.82052	0.0897919	-31478.7	-31490.8	tg_qn+whr_qn	tg_qn+whr_qn
uc010brx.2	29	4721	1144	0.127544	0.00439806	1	100	15750.5	15749.6	1.81176	0.178297	-31484.2	-31490.8	tg_qn	tg_qn
uc010brx.2	29	4721	1144	0.127544	0.00439806	2	11	15751.8	15749.6	4.26714	0.118414	-31478.2	-31490.8	lnfi+whr_qn	lnfi+whr_qn
uc010brx.2	29	4721	1144	0.127544	0.00439806	1	10	15749.7	15749.6	0.11391	0.735736	-31482.5	-31490.8	lnfi	lnfi
uc010brx.2	29	4721	1144	0.127544	0.00439806	1	1	15751.5	15749.6	3.77943	0.0518864	-31486.1	-31490.8	whr_qn	whr_qn
uc010uvn.1	12	4721	177	0.019216	0.00160134	3	111	16854.6	16853.6	2.06302	0.559431	-33675.4	-33698.7	tg_qn+lnfi+whr_qn	lnfi+tg_qn+whr_qn
uc010uvn.1	12	4721	177	0.019216	0.00160134	2	110	16853.8	16853.6	0.37517	0.828959	-33682.2	-33698.7	tg_qn+lnfi	lnfi+tg_qn
uc010uvn.1	12	4721	177	0.019216	0.00160134	2	101	16854.5	16853.6	1.74863	0.417148	-33683.5	-33698.7	tg_qn+whr_qn	tg_qn+whr_qn
uc010uvn.1	12	4721	177	0.019216	0.00160134	1	100	16853.7	16853.6	0.21845	0.640224	-33690.5	-33698.7	tg_qn	tg_qn
uc010uvn.1	12	4721	177	0.019216	0.00160134	2	11	16854.5	16853.6	1.8881	0.389049	-33683.7	-33698.7	lnfi+whr_qn	lnfi+whr_qn
uc010uvn.1	12	4721	177	0.019216	0.00160134	1	10	16853.6	16853.6	0.045799	0.830542	-33690.3	-33698.7	lnfi	lnfi
uc010uvn.1	12	4721	177	0.019216	0.00160134	1	1	16854.4	16853.6	1.68594	0.194137	-33691.9	-33698.7	whr_qn	whr_qn
uc002cmy.2	12	4721	177	0.019216	0.00160134	3	111	16854.6	16853.6	2.06302	0.559431	-33675.4	-33698.7	tg_qn+lnfi+whr_qn	lnfi+tg_qn+whr_qn
uc002cmy.2	12	4721	177	0.019216	0.00160134	2	110	16853.8	16853.6	0.37517	0.828959	-33682.2	-33698.7	tg_qn+lnfi	lnfi+tg_qn
uc002cmy.2	12	4721	177	0.019216	0.00160134	2	101	16854.5	16853.6	1.74863	0.417148	-33683.5	-33698.7	tg_qn+whr_qn	tg_qn+whr_qn
uc002cmy.2	12	4721	177	0.019216	0.00160134	1	100	16853.7	16853.6	0.21845	0.640224	-33690.5	-33698.7	tg_qn	tg_qn
uc002cmy.2	12	4721	177	0.019216	0.00160134	2	11	16854.5	16853.6	1.8881	0.389049	-33683.7	-33698.7	lnfi+whr_qn	lnfi+whr_qn
uc002cmy.2	12	4721	177	0.019216	0.00160134	1	10	16853.6	16853.6	0.045799	0.830542	-33690.3	-33698.7	lnfi	lnfi
uc002cmy.2	12	4721	177	0.019216	0.00160134	1	1	16854.4	16853.6	1.68594	0.194137	-33691.9	-33698.7	whr_qn	whr_qn
uc010uvo.1	16	4721	250	0.0272269	0.00170168	3	111	17361.9	17359.6	4.50099	0.212202	-34689.9	-34710.8	tg_qn+lnfi+whr_qn	lnfi+tg_qn+whr_qn
uc010uvo.1	16	4721	250	0.0272269	0.00170168	2	110	17360	17359.6	0.639558	0.72631	-34694.5	-34710.8	tg_qn+lnfi	lnfi+tg_qn
uc010uvo.1	16	4721	250	0.0272269	0.00170168	2	101	17361.7	17359.6	4.2323	0.120495	-34698.1	-34710.8	tg_qn+whr_qn	tg_qn+whr_qn
uc010uvo.1	16	4721	250	0.0272269	0.00170168	1	100	17359.6	17359.6	0.0249384	0.874521	-34702.4	-34710.8	tg_qn	tg_qn
uc010uvo.1	16	4721	250	0.0272269	0.00170168	2	11	17361.8	17359.6	4.3427	0.114024	-34698.2	-34710.8	lnfi+whr_qn	lnfi+whr_qn
uc010uvo.1	16	4721	250	0.0272269	0.00170168	1	10	17359.9	17359.6	0.608788	0.435244	-34703	-34710.8	lnfi	lnfi
uc010uvo.1	16	4721	250	0.0272269	0.00170168	1	1	17361.7	17359.6	4.17431	0.0410412	-34706.5	-34710.8	whr_qn	whr_qn
uc002cnb.1	93	4721	10011	1.10195	0.0118489	3	111	11098.7	11096.7	4.07752	0.253214	-22163.6	-22184.9	tg_qn+lnfi+whr_qn	lnfi+tg_qn+whr_qn
uc002cnb.1	93	4721	10011	1.10195	0.0118489	2	110	11098	11096.7	2.59778	0.272835	-22170.6	-22184.9	tg_qn+lnfi	lnfi+tg_qn
uc002cnb.1	93	4721	10011	1.10195	0.0118489	2	101	11098.3	11096.7	3.17496	0.20444	-22171.1	-22184.9	tg_qn+whr_qn	tg_qn+whr_qn
uc002cnb.1	93	4721	10011	1.10195	0.0118489	1	100	11097.7	11096.7	1.96217	0.161281	-22178.4	-22184.9	tg_qn	tg_qn
uc002cnb.1	93	4721	10011	1.10195	0.0118489	2	11	11098	11096.7	2.74518	0.253449	-22170.7	-22184.9	lnfi+whr_qn	lnfi+whr_qn
uc002cnb.1	93	4721	10011	1.10195	0.0118489	1	10	11097.5	11096.7	1.5623	0.211328	-22178	-22184.9	lnfi	lnfi
uc002cnb.1	93	4721	10011	1.10195	0.0118489	1	1	11097	11096.7	0.702275	0.40202	-22177.1	-22184.9	whr_qn	whr_qn
uc002cmz.2	93	4721	10011	1.10195	0.0118489	3	111	11098.7	11096.7	4.07752	0.253214	-22163.6	-22184.9	tg_qn+lnfi+whr_qn	lnfi+tg_qn+whr_qn
uc002cmz.2	93	4721	10011	1.10195	0.0118489	2	110	11098	11096.7	2.59778	0.272835	-22170.6	-22184.9	tg_qn+lnfi	lnfi+tg_qn
uc002cmz.2	93	4721	10011	1.10195	0.0118489	2	101	11098.3	11096.7	3.17496	0.20444	-22171.1	-22184.9	tg_qn+whr_qn	tg_qn+whr_qn
uc002cmz.2	93	4721	10011	1.10195	0.0118489	1	100	11097.7	11096.7	1.96217	0.161281	-22178.4	-22184.9	tg_qn	tg_qn
uc002cmz.2	93	4721	10011	1.10195	0.0118489	2	11	11098	11096.7	2.74518	0.253449	-22170.7	-22184.9	lnfi+whr_qn	lnfi+whr_qn
uc002cmz.2	93	4721	10011	1.10195	0.0118489	1	10	11097.5	11096.7	1.5623	0.211328	-22178	-22184.9	lnfi	lnfi
uc002cmz.2	93	4721	10011	1.10195	0.0118489	1	1	11097	11096.7	0.702275	0.40202	-22177.1	-22184.9	whr_qn	whr_qn
uc002cna.2	93	4721	10011	1.10195	0.0118489	3	111	11098.7	11096.7	4.07752	0.253214	-22163.6	-22184.9	tg_qn+lnfi+whr_qn	lnfi+tg_qn+whr_qn
uc002cna.2	93	4721	10011	1.10195	0.0118489	2	110	11098	11096.7	2.59778	0.272835	-22170.6	-22184.9	tg_qn+lnfi	lnfi+tg_qn
uc002cna.2	93	4721	10011	1.10195	0.0118489	2	101	11098.3	11096.7	3.17496	0.20444	-22171.1	-22184.9	tg_qn+whr_qn	tg_qn+whr_qn
uc002cna.2	93	4721	10011	1.10195	0.0118489	1	100	11097.7	11096.7	1.96217	0.161281	-22178.4	-22184.9	tg_qn	tg_qn
uc002cna.2	93	4721	10011	1.10195	0.0118489	2	11	11098	11096.7	2.74518	0.253449	-22170.7	-22184.9	lnfi+whr_qn	lnfi+whr_qn
uc002cna.2	93	4721	10011	1.10195	0.0118489	1	10	11097.5	11096.7	1.5623	0.211328	-22178	-22184.9	lnfi	lnfi
uc002cna.2	93	4721	10011	1.10195	0.0118489	1	1	11097	11096.7	0.702275	0.40202	-22177.1	-22184.9	whr_qn	whr_qn
uc010uvp.1	93	4721	10011	1.10195	0.0118489	3	111	11098.7	11096.7	4.07752	0.253214	-22163.6	-22184.9	tg_qn+lnfi+whr_qn	lnfi+tg_qn+whr_qn
uc010uvp.1	93	4721	10011	1.10195	0.0118489	2	110	11098	11096.7	2.59778	0.272835	-22170.6	-22184.9	tg_qn+lnfi	lnfi+tg_qn
uc010uvp.1	93	4721	10011	1.10195	0.0118489	2	101	11098.3	11096.7	3.17496	0.20444	-22171.1	-22184.9	tg_qn+whr_qn	tg_qn+whr_qn
uc010uvp.1	93	4721	10011	1.10195	0.0118489	1	100	11097.7	11096.7	1.96217	0.161281	-22178.4	-22184.9	tg_qn	tg_qn
uc010uvp.1	93	4721	10011	1.10195	0.0118489	2	11	11098	11096.7	2.74518	0.253449	-22170.7	-22184.9	lnfi+whr_qn	lnfi+whr_qn
uc010uvp.1	93	4721	10011	1.10195	0.0118489	1	10	11097.5	11096.7	1.5623	0.211328	-22178	-22184.9	lnfi	lnfi
uc010uvp.1	93	4721	10011	1.10195	0.0118489	1	1	11097	11096.7	0.702275	0.40202	-22177.1	-22184.9	whr_qn	whr_qn
uc010bry.1	50	4721	6225	0.683825	0.0136765	3	111	9837.63	9835.89	3.48366	0.322887	-19641.4	-19663.3	tg_qn+lnfi+whr_qn	lnfi+tg_qn+whr_qn
uc010bry.1	50	4721	6225	0.683825	0.0136765	2	110	9836.98	9835.89	2.18921	0.334672	-19648.6	-19663.3	tg_qn+lnfi	lnfi+tg_qn
uc010bry.1	50	4721	6225	0.683825	0.0136765	2	101	9836.92	9835.89	2.0731	0.354677	-19648.5	-19663.3	tg_qn+whr_qn	tg_qn+whr_qn
uc010bry.1	50	4721	6225	0.683825	0.0136765	1	100	9836.43	9835.89	1.09309	0.295787	-19655.9	-19663.3	tg_qn	tg_qn
uc010bry.1	50	4721	6225	0.683825	0.0136765	2	11	9837.36	9835.89	2.95592	0.228103	-19649.3	-19663.3	lnfi+whr_qn	lnfi+whr_qn
uc010bry.1	50	4721	6225	0.683825	0.0136765	1	10	9836.8	9835.89	1.83247	0.175836	-19656.7	-19663.3	lnfi	lnfi
uc010bry.1	50	4721	6225	0.683825	0.0136765	1	1	9836.2	9835.89	0.626562	0.428619	-19655.5	-19663.3	whr_qn	whr_qn
uc002cnc.1	6	4721	421	0.0476298	0.0079383	3	111	11908.9	11908.4	0.965059	0.809706	-23784	-23808.4	tg_qn+lnfi+whr_qn	lnfi+tg_qn+whr_qn
uc002cnc.1	6	4721	421	0.0476298	0.0079383	2	110	11908.6	11908.4	0.383664	0.825446	-23791.9	-23808.4	tg_qn+lnfi	lnfi+tg_qn
uc002cnc.1	6	4721	421	0.0476298	0.0079383	2	101	11908.9	11908.4	0.926153	0.629344	-23792.4	-23808.4	tg_qn+whr_qn	tg_qn+whr_qn
uc002cnc.1	6	4721	421	0.0476298	0.0079383	1	100	11908.6	11908.4	0.294901	0.587097	-23800.2	-23808.4	tg_qn	tg_qn
uc002cnc.1	6	4721	421	0.0476298	0.0079383	2	11	11908.7	11908.4	0.480759	0.78633	-23791.9	-23808.4	lnfi+whr_qn	lnfi+whr_qn
uc002cnc.1	6	4721	421	0.0476298	0.0079383	1	10	11908.4	11908.4	0.00960634	0.921923	-23799.9	-23808.4	lnfi	lnfi
uc002cnc.1	6	4721	421	0.0476298	0.0079383	1	1	11908.7	11908.4	0.475274	0.490571	-23800.4	-23808.4	whr_qn	whr_qn
uc002cnd.2	38	4721	1184	0.130499	0.00343418	3	111	16232.4	16230.5	3.81211	0.28248	-32431	-32452.6	tg_qn+lnfi+whr_qn	lnfi+tg_qn+whr_qn
uc002cnd.2	38	4721	1184	0.130499	0.00343418	2	110	16232.4	16230.5	3.75068	0.153303	-32439.4	-32452.6	tg_qn+lnfi	lnfi+tg_qn
uc002cnd.2	38	4721	1184	0.130499	0.00343418	2	101	16230.6	16230.5	0.0594126	0.970731	-32435.7	-32452.6	tg_qn+whr_qn	tg_qn+whr_qn
uc002cnd.2	38	4721	1184	0.130499	0.00343418	1	100	16230.6	16230.5	0.0517371	0.820068	-32444.2	-32452.6	tg_qn	tg_qn
uc002cnd.2	38	4721	1184	0.130499	0.00343418	2	11	16232.3	16230.5	3.58016	0.166947	-32439.3	-32452.6	lnfi+whr_qn	lnfi+whr_qn
uc002cnd.2	38	4721	1184	0.130499	0.00343418	1	10	16232.3	16230.5	3.48768	0.0618272	-32447.6	-32452.6	lnfi	lnfi
uc002cnd.2	38	4721	1184	0.130499	0.00343418	1	1	16230.5	16230.5	0.011019	0.916398	-32444.2	-32452.6	whr_qn	whr_qn
uc010brz.2	38	4721	1184	0.130499	0.00343418	3	111	16232.4	16230.5	3.81211	0.28248	-32431	-32452.6	tg_qn+lnfi+whr_qn	lnfi+tg_qn+whr_qn
uc010brz.2	38	4721	1184	0.130499	0.00343418	2	110	16232.4	16230.5	3.75068	0.153303	-32439.4	-32452.6	tg_qn+lnfi	lnfi+tg_qn
uc010brz.2	38	4721	1184	0.130499	0.00343418	2	101	16230.6	16230.5	0.0594126	0.970731	-32435.7	-32452.6	tg_qn+whr_qn	tg_qn+whr_qn
uc010brz.2	38	4721	1184	0.130499	0.00343418	1	100	16230.6	16230.5	0.0517371	0.820068	-32444.2	-32452.6	tg_qn	tg_qn
uc010brz.2	38	4721	1184	0.130499	0.00343418	2	11	16232.3	16230.5	3.58016	0.166947	-32439.3	-32452.6	lnfi+whr_qn	lnfi+whr_qn
uc010brz.2	38	4721	1184	0.130499	0.00343418	1	10	16232.3	16230.5	3.48768	0.0618272	-32447.6	-32452.6	lnfi	lnfi
uc010brz.2	38	4721	1184	0.130499	0.00343418	1	1	16230.5	16230.5	0.011019	0.916398	-32444.2	-32452.6	whr_qn	whr_qn
uc010uvq.1	105	4721	4934	0.540087	0.00514369	3	111	13387.5	13387	0.945419	0.814456	-26741.1	-26765.5	tg_qn+lnfi+whr_qn	lnfi+tg_qn+whr_qn
uc010uvq.1	105	4721	4934	0.540087	0.00514369	2	110	13387.3	13387	0.559598	0.755936	-26749.2	-26765.5	tg_qn+lnfi	lnfi+tg_qn
uc010uvq.1	105	4721	4934	0.540087	0.00514369	2	101	13387.2	13387	0.318688	0.852703	-26748.9	-26765.5	tg_qn+whr_qn	tg_qn+whr_qn
uc010uvq.1	105	4721	4934	0.540087	0.00514369	1	100	13387	13387	0.0441139	0.833642	-26757.1	-26765.5	tg_qn	tg_qn
uc010uvq.1	105	4721	4934	0.540087	0.00514369	2	11	13387.5	13387	0.934259	0.626799	-26749.5	-26765.5	lnfi+whr_qn	lnfi+whr_qn
uc010uvq.1	105	4721	4934	0.540087	0.00514369	1	10	13387.3	13387	0.540878	0.462069	-26757.6	-26765.5	lnfi	lnfi
uc010uvq.1	105	4721	4934	0.540087	0.00514369	1	1	13387.1	13387	0.23477	0.628009	-26757.3	-26765.5	whr_qn	whr_qn
uc002cne.2	105	4721	4934	0.540087	0.00514369	3	111	13387.5	13387	0.945419	0.814456	-26741.1	-26765.5	tg_qn+lnfi+whr_qn	lnfi+tg_qn+whr_qn
uc002cne.2	105	4721	4934	0.540087	0.00514369	2	110	13387.3	13387	0.559598	0.755936	-26749.2	-26765.5	tg_qn+lnfi	lnfi+tg_qn
uc002cne.2	105	4721	4934	0.540087	0.00514369	2	101	13387.2	13387	0.318688	0.852703	-26748.9	-26765.5	tg_qn+whr_qn	tg_qn+whr_qn
uc002cne.2	105	4721	4934	0.540087	0.00514369	1	100	13387	13387	0.0441139	0.833642	-26757.1	-26765.5	tg_qn	tg_qn
uc002cne.2	105	4721	4934	0.540087	0.00514369	2	11	13387.5	13387	0.934259	0.626799	-26749.5	-26765.5	lnfi+whr_qn	lnfi+whr_qn
uc002cne.2	105	4721	4934	0.540087	0.00514369	1	10	13387.3	13387	0.540878	0.462069	-26757.6	-26765.5	lnfi	lnfi
uc002cne.2	105	4721	4934	0.540087	0.00514369	1	1	13387.1	13387	0.23477	0.628009	-26757.3	-26765.5	whr_qn	whr_qn
uc010uvr.1	150	4721	8722	0.965205	0.0064347	3	111	13252.9	13252.2	1.48727	0.685211	-26472	-26495.9	tg_qn+lnfi+whr_qn	lnfi+tg_qn+whr_qn
uc010uvr.1	150	4721	8722	0.965205	0.0064347	2	110	13252.4	13252.2	0.398547	0.819326	-26479.3	-26495.9	tg_qn+lnfi	lnfi+tg_qn
uc010uvr.1	150	4721	8722	0.965205	0.0064347	2	101	13252.7	13252.2	1.0326	0.596726	-26480	-26495.9	tg_qn+whr_qn	tg_qn+whr_qn
uc010uvr.1	150	4721	8722	0.965205	0.0064347	1	100	13252.2	13252.2	0.10226	0.749134	-26487.5	-26495.9	tg_qn	tg_qn
uc010uvr.1	150	4721	8722	0.965205	0.0064347	2	11	13252.9	13252.2	1.43141	0.488847	-26480.4	-26495.9	lnfi+whr_qn	lnfi+whr_qn
uc010uvr.1	150	4721	8722	0.965205	0.0064347	1	10	13252.4	13252.2	0.378129	0.538606	-26487.8	-26495.9	lnfi	lnfi
uc010uvr.1	150	4721	8722	0.965205	0.0064347	1	1	13252.6	13252.2	0.805424	0.369477	-26488.2	-26495.9	whr_qn	whr_qn
uc002cnf.2	31	4721	2741	0.299502	0.00966136	3	111	9820.01	9818.57	2.87279	0.411657	-19606.2	-19628.7	tg_qn+lnfi+whr_qn	lnfi+tg_qn+whr_qn
uc002cnf.2	31	4721	2741	0.299502	0.00966136	2	110	9819.73	9818.57	2.30779	0.315407	-19614.1	-19628.7	tg_qn+lnfi	lnfi+tg_qn
uc002cnf.2	31	4721	2741	0.299502	0.00966136	2	101	9818.74	9818.57	0.340247	0.843561	-19612.1	-19628.7	tg_qn+whr_qn	tg_qn+whr_qn
uc002cnf.2	31	4721	2741	0.299502	0.00966136	1	100	9818.59	9818.57	0.0414548	0.838663	-19620.3	-19628.7	tg_qn	tg_qn
uc002cnf.2	31	4721	2741	0.299502	0.00966136	2	11	9819.97	9818.57	2.78845	0.248025	-19614.6	-19628.7	lnfi+whr_qn	lnfi+whr_qn
uc002cnf.2	31	4721	2741	0.299502	0.00966136	1	10	9819.65	9818.57	2.16308	0.141361	-19622.4	-19628.7	lnfi	lnfi
uc002cnf.2	31	4721	2741	0.299502	0.00966136	1	1	9818.7	9818.57	0.255156	0.613468	-19620.5	-19628.7	whr_qn	whr_qn
uc010uvs.1	7	4721	283	0.0315434	0.0045062	3	111	12961.8	12960.3	2.90314	0.406801	-25889.7	-25912.2	tg_qn+lnfi+whr_qn	lnfi+tg_qn+whr_qn
uc010uvs.1	7	4721	283	0.0315434	0.0045062	2	110	12961.6	12960.3	2.55516	0.278711	-25897.8	-25912.2	tg_qn+lnfi	lnfi+tg_qn
uc010uvs.1	7	4721	283	0.0315434	0.0045062	2	101	12960.5	12960.3	0.35523	0.837265	-25895.6	-25912.2	tg_qn+whr_qn	tg_qn+whr_qn
uc010uvs.1	7	4721	283	0.0315434	0.0045062	1	100	12960.4	12960.3	0.19802	0.656324	-25903.9	-25912.2	tg_qn	tg_qn
uc010uvs.1	7	4721	283	0.0315434	0.0045062	2	11	12961.4	12960.3	2.12067	0.346341	-25897.4	-25912.2	lnfi+whr_qn	lnfi+whr_qn
uc010uvs.1	7	4721	283	0.0315434	0.0045062	1	10	12961.2	12960.3	1.63978	0.200356	-25905.4	-25912.2	lnfi	lnfi
uc010uvs.1	7	4721	283	0.0315434	0.0045062	1	1	12960.4	12960.3	0.208647	0.64783	-25904	-25912.2	whr_qn	whr_qn
uc002cnh.2	31	4721	1546	0.180289	0.00581577	3	111	13768.7	13765.7	6.00062	0.11158	-27503.5	-27522.9	tg_qn+lnfi+whr_qn	lnfi+tg_qn+whr_qn
uc002cnh.2	31	4721	1546	0.180289	0.00581577	2	110	13768.6	13765.7	5.92884	0.0515904	-27511.9	-27522.9	tg_qn+lnfi	lnfi+tg_qn
uc002cnh.2	31	4721	1546	0.180289	0.00581577	2	101	13767.3	13765.7	3.32632	0.189539	-27509.3	-27522.9	tg_qn+whr_qn	tg_qn+whr_qn
uc002cnh.2	31	4721	1546	0.180289	0.00581577	1	100	13767.3	13765.7	3.29328	0.069564	-27517.7	-27522.9	tg_qn	tg_qn
uc002cnh.2	31	4721	1546	0.180289	0.00581577	2	11	13768	13765.7	4.7398	0.0934899	-27510.7	-27522.9	lnfi+whr_qn	lnfi+whr_qn
uc002cnh.2	31	4721	1546	0.180289	0.00581577	1	10	13768	13765.7	4.70267	0.0301157	-27519.1	-27522.9	lnfi	lnfi
uc002cnh.2	31	4721	1546	0.180289	0.00581577	1	1	13765.7	13765.7	0.147303	0.701126	-27514.6	-27522.9	whr_qn	whr_qn
uc002cni.2	21	4721	1065	0.113194	0.00539018	3	111	11110.6	11110.4	0.331431	0.954013	-22187.4	-22212.4	tg_qn+lnfi+whr_qn	lnfi+tg_qn+whr_qn
uc002cni.2	21	4721	1065	0.113194	0.00539018	2	110	11110.5	11110.4	0.174607	0.916399	-22195.7	-22212.4	tg_qn+lnfi	lnfi+tg_qn
uc002cni.2	21	4721	1065	0.113194	0.00539018	2	101	11110.6	11110.4	0.300113	0.860659	-22195.8	-22212.4	tg_qn+whr_qn	tg_qn+whr_qn
uc002cni.2	21	4721	1065	0.113194	0.00539018	1	100	11110.5	11110.4	0.145919	0.702466	-22204.1	-22212.4	tg_qn	tg_qn
uc002cni.2	21	4721	1065	0.113194	0.00539018	2	11	11110.6	11110.4	0.227695	0.892394	-22195.7	-22212.4	lnfi+whr_qn	lnfi+whr_qn
uc002cni.2	21	4721	1065	0.113194	0.00539018	1	10	11110.5	11110.4	0.0437001	0.834413	-22204	-22212.4	lnfi	lnfi
uc002cni.2	21	4721	1065	0.113194	0.00539018	1	1	11110.5	11110.4	0.196634	0.657451	-22204.2	-22212.4	whr_qn	whr_qn
uc002cnj.2	21	4721	1065	0.113194	0.00539018	3	111	11110.6	11110.4	0.331431	0.954013	-22187.4	-22212.4	tg_qn+lnfi+whr_qn	lnfi+tg_qn+whr_qn
uc002cnj.2	21	4721	1065	0.113194	0.00539018	2	110	11110.5	11110.4	0.174607	0.916399	-22195.7	-22212.4	tg_qn+lnfi	lnfi+tg_qn
uc002cnj.2	21	4721	1065	0.113194	0.00539018	2	101	11110.6	11110.4	0.300113	0.860659	-22195.8	-22212.4	tg_qn+whr_qn	tg_qn+whr_qn
uc002cnj.2	21	4721	1065	0.113194	0.00539018	1	100	11110.5	11110.4	0.145919	0.702466	-22204.1	-22212.4	tg_qn	tg_qn
uc002cnj.2	21	4721	1065	0.113194	0.00539018	2	11	11110.6	11110.4	0.227695	0.892394	-22195.7	-22212.4	lnfi+whr_qn	lnfi+whr_qn
uc002cnj.2	21	4721	1065	0.113194	0.00539018	1	10	11110.5	11110.4	0.0437001	0.834413	-22204	-22212.4	lnfi	lnfi
uc002cnj.2	21	4721	1065	0.113194	0.00539018	1	1	11110.5	11110.4	0.196634	0.657451	-22204.2	-22212.4	whr_qn	whr_qn
uc002cnp.1	2	4721	268	0.03044	0.01522	3	111	7742.6	7741.35	2.50212	0.474908	-15451.4	-15474.2	tg_qn+lnfi+whr_qn	lnfi+tg_qn+whr_qn
uc002cnp.1	2	4721	268	0.03044	0.01522	2	110	7742.3	7741.35	1.89614	0.387488	-15459.2	-15474.2	tg_qn+lnfi	lnfi+tg_qn
uc002cnp.1	2	4721	268	0.03044	0.01522	2	101	7741.92	7741.35	1.14244	0.564835	-15458.5	-15474.2	tg_qn+whr_qn	tg_qn+whr_qn
uc002cnp.1	2	4721	268	0.03044	0.01522	1	100	7741.48	7741.35	0.255696	0.613092	-15466	-15474.2	tg_qn	tg_qn
uc002cnp.1	2	4721	268	0.03044	0.01522	2	11	7742.58	7741.35	2.47091	0.290703	-15459.8	-15474.2	lnfi+whr_qn	lnfi+whr_qn
uc002cnp.1	2	4721	268	0.03044	0.01522	1	10	7742.29	7741.35	1.87384	0.171036	-15467.7	-15474.2	lnfi	lnfi
uc002cnp.1	2	4721	268	0.03044	0.01522	1	1	7741.86	7741.35	1.02859	0.31049	-15466.8	-15474.2	whr_qn	whr_qn
uc010bsa.1	17	4721	1325	0.142883	0.00840489	3	111	9765.76	9765.14	1.23392	0.744881	-19497.7	-19521.8	tg_qn+lnfi+whr_qn	lnfi+tg_qn+whr_qn
uc010bsa.1	17	4721	1325	0.142883	0.00840489	2	110	9765.19	9765.14	0.112571	0.945269	-19505	-19521.8	tg_qn+lnfi	lnfi+tg_qn
uc010bsa.1	17	4721	1325	0.142883	0.00840489	2	101	9765.74	9765.14	1.19958	0.548927	-19506.1	-19521.8	tg_qn+whr_qn	tg_qn+whr_qn
uc010bsa.1	17	4721	1325	0.142883	0.00840489	1	100	9765.18	9765.14	0.0767806	0.781709	-19513.4	-19521.8	tg_qn	tg_qn
uc010bsa.1	17	4721	1325	0.142883	0.00840489	2	11	9765.74	9765.14	1.20142	0.548422	-19506.1	-19521.8	lnfi+whr_qn	lnfi+whr_qn
uc010bsa.1	17	4721	1325	0.142883	0.00840489	1	10	9765.16	9765.14	0.0522405	0.819209	-19513.4	-19521.8	lnfi	lnfi
uc010bsa.1	17	4721	1325	0.142883	0.00840489	1	1	9765.72	9765.14	1.16837	0.279737	-19514.5	-19521.8	whr_qn	whr_qn
uc002cnl.2	17	4721	1325	0.142883	0.00840489	3	111	9765.76	9765.14	1.23392	0.744881	-19497.7	-19521.8	tg_qn+lnfi+whr_qn	lnfi+tg_qn+whr_qn
uc002cnl.2	17	4721	1325	0.142883	0.00840489	2	110	9765.19	9765.14	0.112571	0.945269	-19505	-19521.8	tg_qn+lnfi	lnfi+tg_qn
uc002cnl.2	17	4721	1325	0.142883	0.00840489	2	101	9765.74	9765.14	1.19958	0.548927	-19506.1	-19521.8	tg_qn+whr_qn	tg_qn+whr_qn
uc002cnl.2	17	4721	1325	0.142883	0.00840489	1	100	9765.18	9765.14	0.0767806	0.781709	-19513.4	-19521.8	tg_qn	tg_qn
uc002cnl.2	17	4721	1325	0.142883	0.00840489	2	11	9765.74	9765.14	1.20142	0.548422	-19506.1	-19521.8	lnfi+whr_qn	lnfi+whr_qn
uc002cnl.2	17	4721	1325	0.142883	0.00840489	1	10	9765.16	9765.14	0.0522405	0.819209	-19513.4	-19521.8	lnfi	lnfi
uc002cnl.2	17	4721	1325	0.142883	0.00840489	1	1	9765.72	9765.14	1.16837	0.279737	-19514.5	-19521.8	whr_qn	whr_qn
uc002cnm.2	17	4721	1325	0.142883	0.00840489	3	111	9765.76	9765.14	1.23392	0.744881	-19497.7	-19521.8	tg_qn+lnfi+whr_qn	lnfi+tg_qn+whr_qn
uc002cnm.2	17	4721	1325	0.142883	0.00840489	2	110	9765.19	9765.14	0.112571	0.945269	-19505	-19521.8	tg_qn+lnfi	lnfi+tg_qn
uc002cnm.2	17	4721	1325	0.142883	0.00840489	2	101	9765.74	9765.14	1.19958	0.548927	-19506.1	-19521.8	tg_qn+whr_qn	tg_qn+whr_qn
uc002cnm.2	17	4721	1325	0.142883	0.00840489	1	100	9765.18	9765.14	0.0767806	0.781709	-19513.4	-19521.8	tg_qn	tg_qn
uc002cnm.2	17	4721	1325	0.142883	0.00840489	2	11	9765.74	9765.14	1.20142	0.548422	-19506.1	-19521.8	lnfi+whr_qn	lnfi+whr_qn
uc002cnm.2	17	4721	1325	0.142883	0.00840489	1	10	9765.16	9765.14	0.0522405	0.819209	-19513.4	-19521.8	lnfi	lnfi
uc002cnm.2	17	4721	1325	0.142883	0.00840489	1	1	9765.72	9765.14	1.16837	0.279737	-19514.5	-19521.8	whr_qn	whr_qn
uc002cnn.2	17	4721	1325	0.142883	0.00840489	3	111	9765.76	9765.14	1.23392	0.744881	-19497.7	-19521.8	tg_qn+lnfi+whr_qn	lnfi+tg_qn+whr_qn
uc002cnn.2	17	4721	1325	0.142883	0.00840489	2	110	9765.19	9765.14	0.112571	0.945269	-19505	-19521.8	tg_qn+lnfi	lnfi+tg_qn
uc002cnn.2	17	4721	1325	0.142883	0.00840489	2	101	9765.74	9765.14	1.19958	0.548927	-19506.1	-19521.8	tg_qn+whr_qn	tg_qn+whr_qn
uc002cnn.2	17	4721	1325	0.142883	0.00840489	1	100	9765.18	9765.14	0.0767806	0.781709	-19513.4	-19521.8	tg_qn	tg_qn
uc002cnn.2	17	4721	1325	0.142883	0.00840489	2	11	9765.74	9765.14	1.20142	0.548422	-19506.1	-19521.8	lnfi+whr_qn	lnfi+whr_qn
uc002cnn.2	17	4721	1325	0.142883	0.00840489	1	10	9765.16	9765.14	0.0522405	0.819209	-19513.4	-19521.8	lnfi	lnfi
uc002cnn.2	17	4721	1325	0.142883	0.00840489	1	1	9765.72	9765.14	1.16837	0.279737	-19514.5	-19521.8	whr_qn	whr_qn
uc002cno.2	17	4721	1325	0.142883	0.00840489	3	111	9765.76	9765.14	1.23392	0.744881	-19497.7	-19521.8	tg_qn+lnfi+whr_qn	lnfi+tg_qn+whr_qn
uc002cno.2	17	4721	1325	0.142883	0.00840489	2	110	9765.19	9765.14	0.112571	0.945269	-19505	-19521.8	tg_qn+lnfi	lnfi+tg_qn
uc002cno.2	17	4721	1325	0.142883	0.00840489	2	101	9765.74	9765.14	1.19958	0.548927	-19506.1	-19521.8	tg_qn+whr_qn	tg_qn+whr_qn
uc002cno.2	17	4721	1325	0.142883	0.00840489	1	100	9765.18	9765.14	0.0767806	0.781709	-19513.4	-19521.8	tg_qn	tg_qn
uc002cno.2	17	4721	1325	0.142883	0.00840489	2	11	9765.74	9765.14	1.20142	0.548422	-19506.1	-19521.8	lnfi+whr_qn	lnfi+whr_qn
uc002cno.2	17	4721	1325	0.142883	0.00840489	1	10	9765.16	9765.14	0.0522405	0.819209	-19513.4	-19521.8	lnfi	lnfi
uc002cno.2	17	4721	1325	0.142883	0.00840489	1	1	9765.72	9765.14	1.16837	0.279737	-19514.5	-19521.8	whr_qn	whr_qn
uc002cns.1	1	4721	176	0.0198596	0.0198596	3	111	5494.58	5493.44	2.28688	0.515039	-10955.3	-10978.4	tg_qn+lnfi+whr_qn	lnfi+tg_qn+whr_qn
uc002cns.1	1	4721	176	0.0198596	0.0198596	2	110	5493.99	5493.44	1.1087	0.574444	-10962.6	-10978.4	tg_qn+lnfi	lnfi+tg_qn
uc002cns.1	1	4721	176	0.0198596	0.0198596	2	101	5494.58	5493.44	2.28449	0.319101	-10963.8	-10978.4	tg_qn+whr_qn	tg_qn+whr_qn
uc002cns.1	1	4721	176	0.0198596	0.0198596	1	100	5493.97	5493.44	1.07298	0.300273	-10971	-10978.4	tg_qn	tg_qn
[truncated: 116,966 more rows]
